# Supplementary material
Source: PubMed Central journal article supplement (PMC6352896)

Figure 1a.

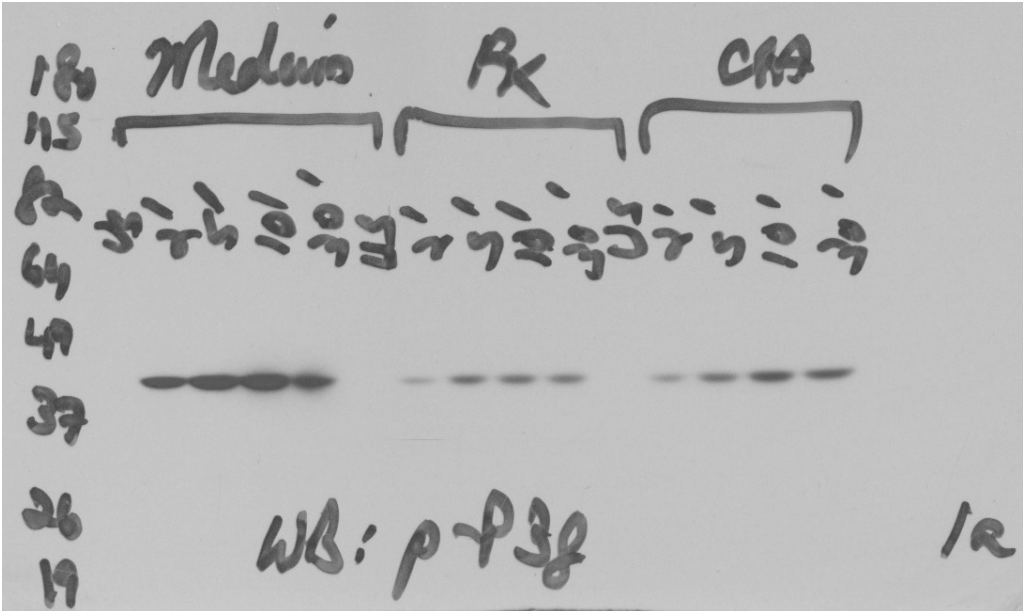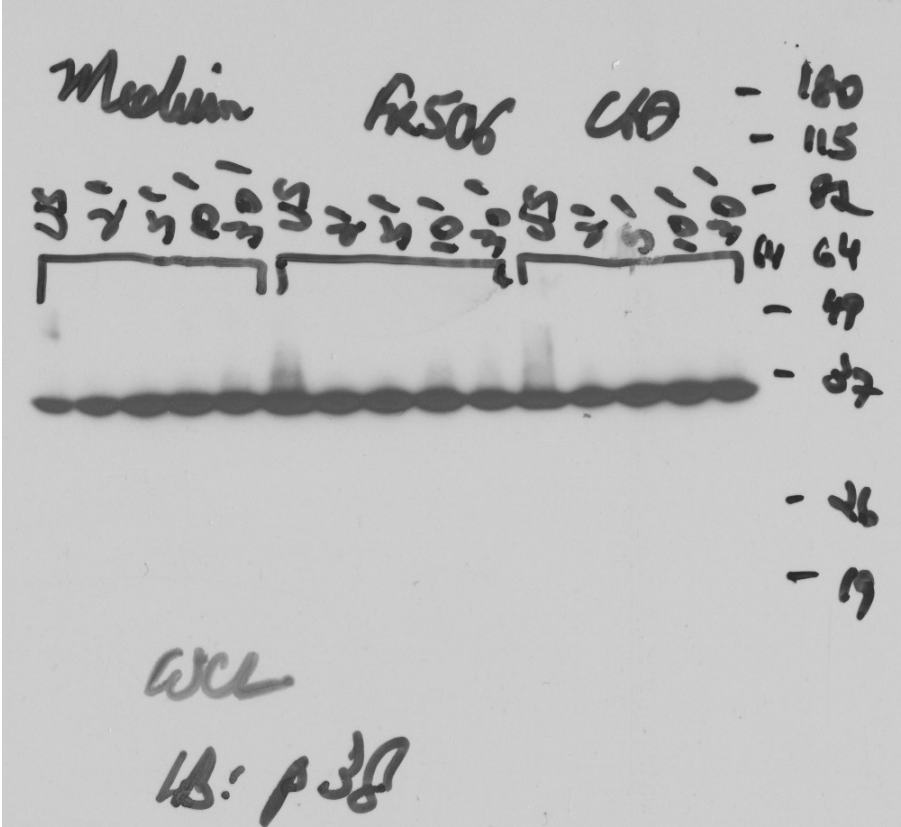

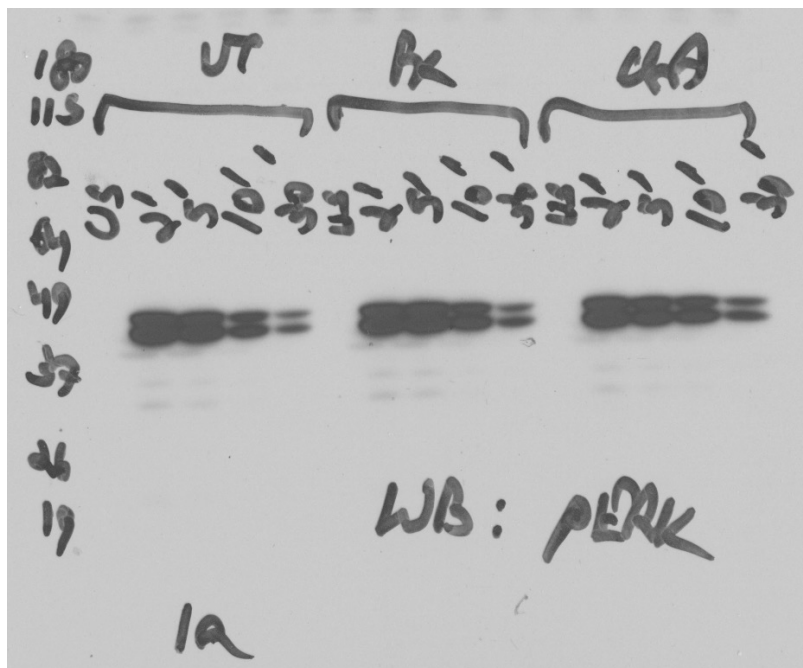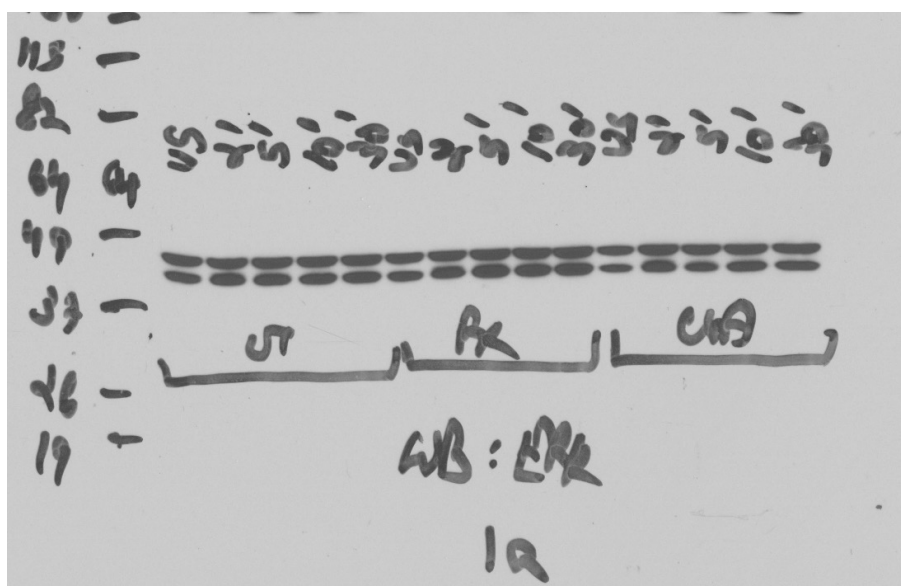

Figure 1b.

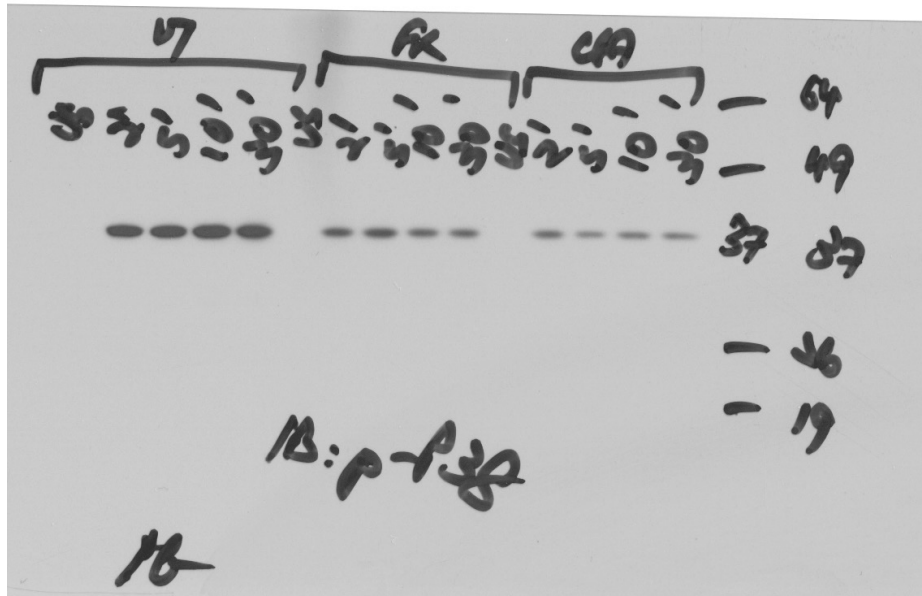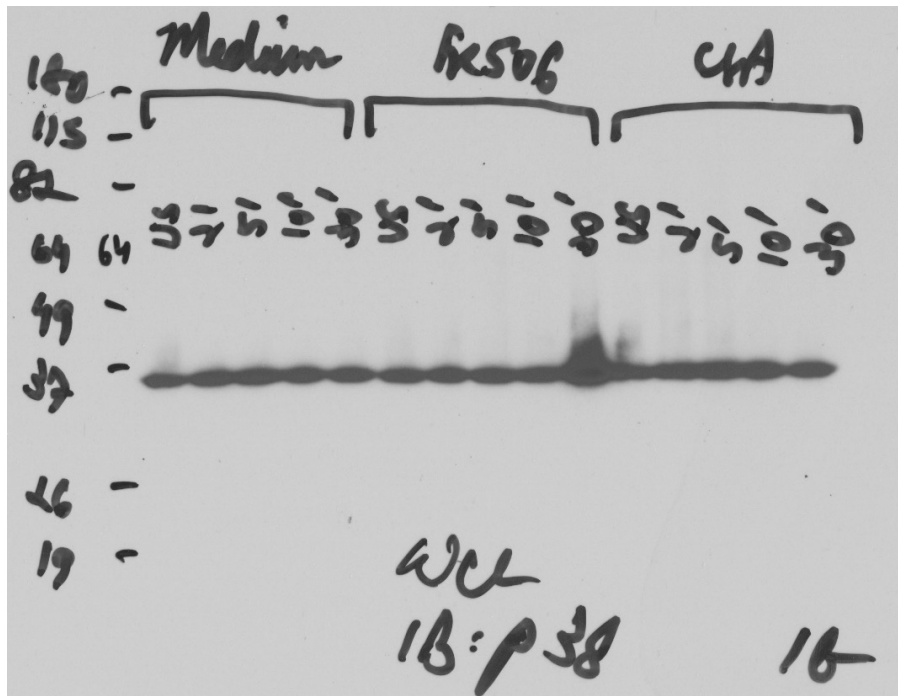

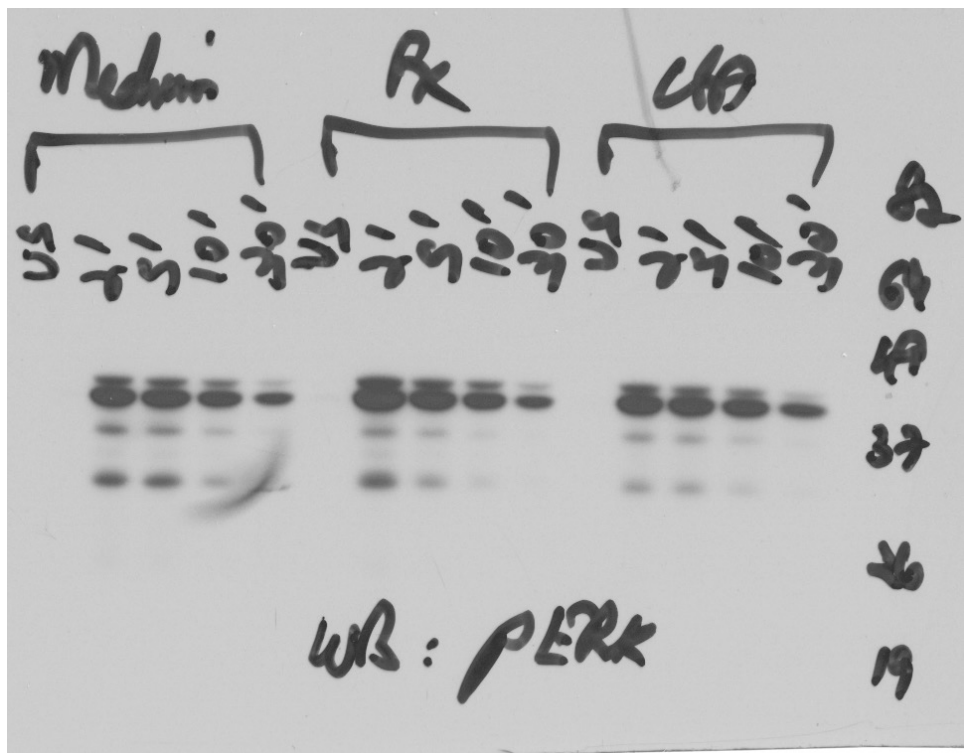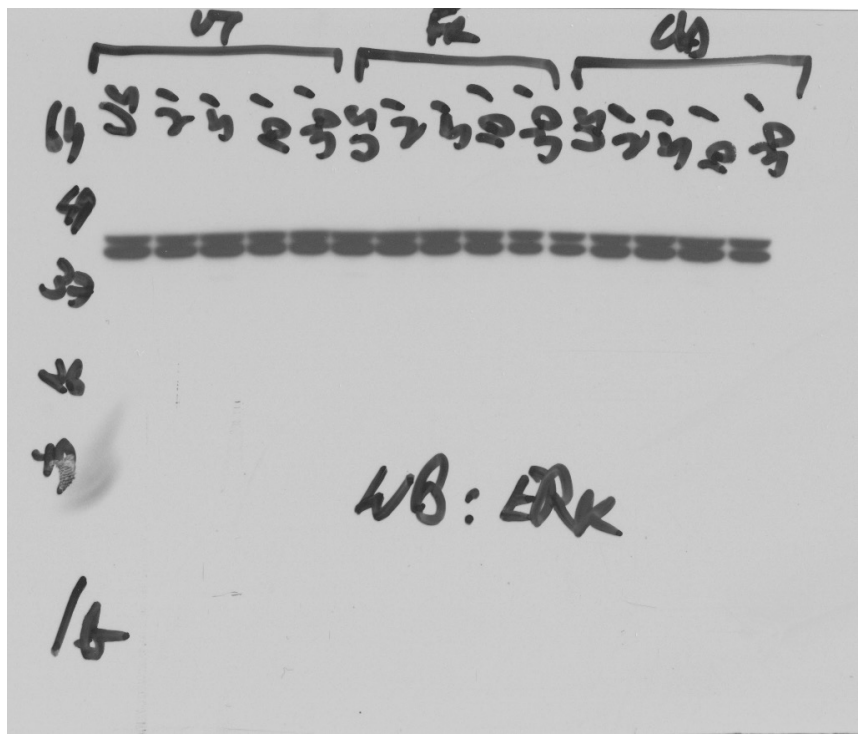



Figure 1c.

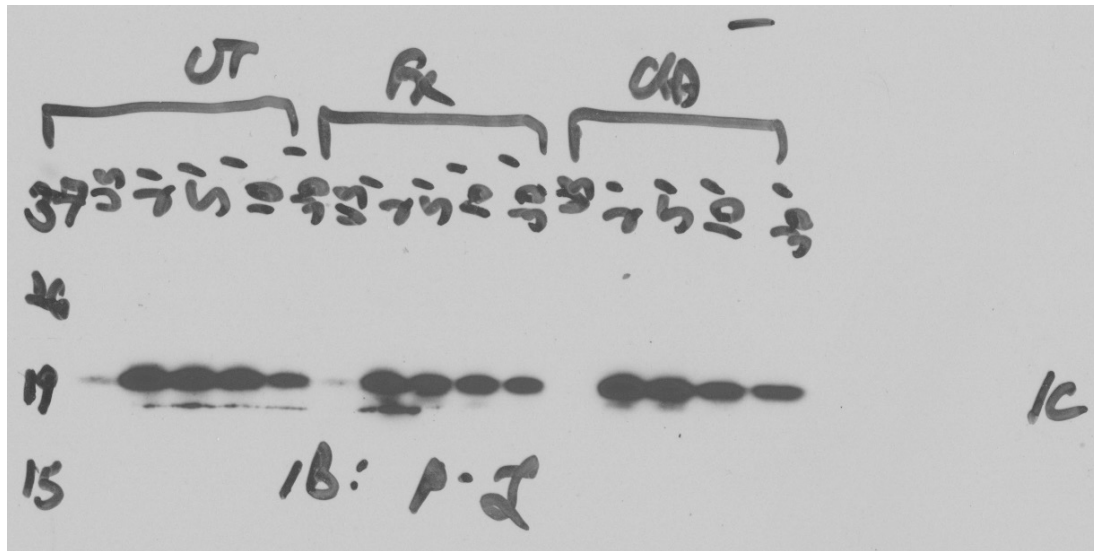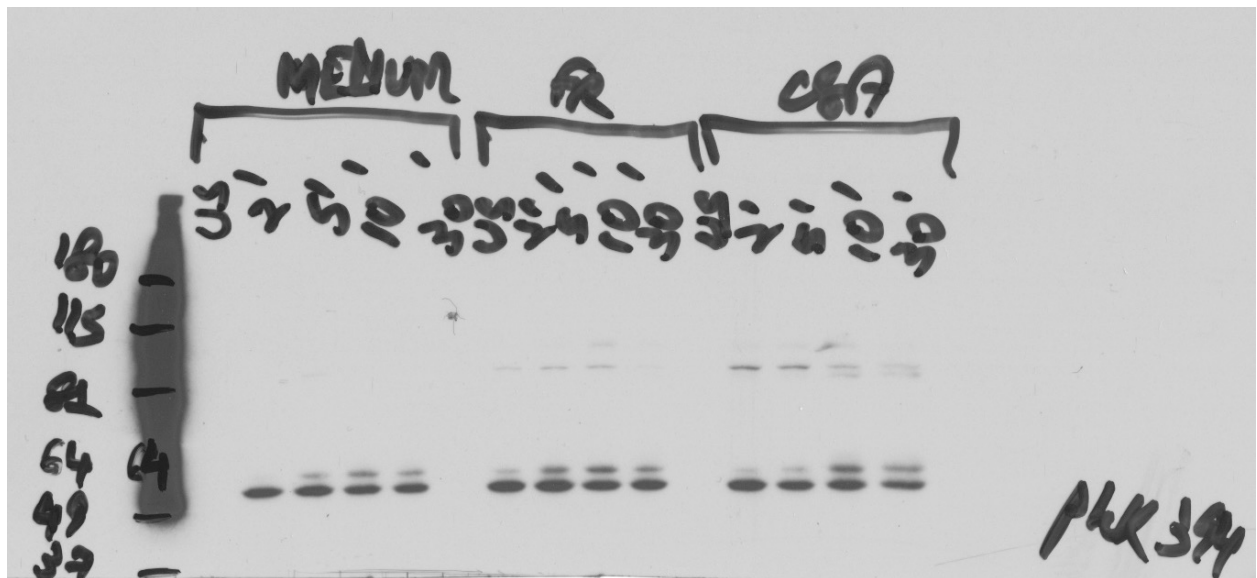

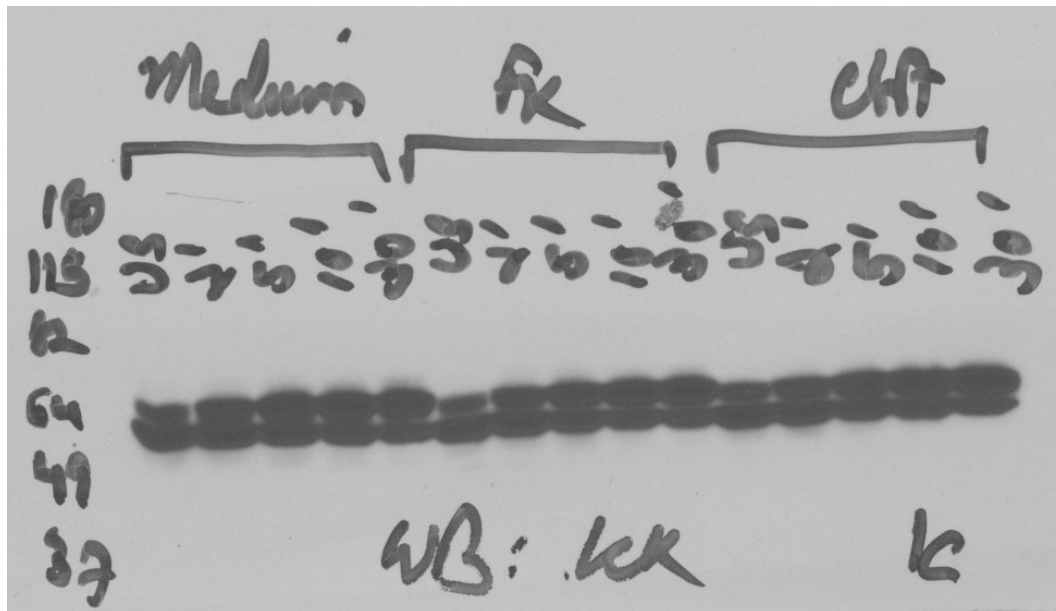

Figure 1d.

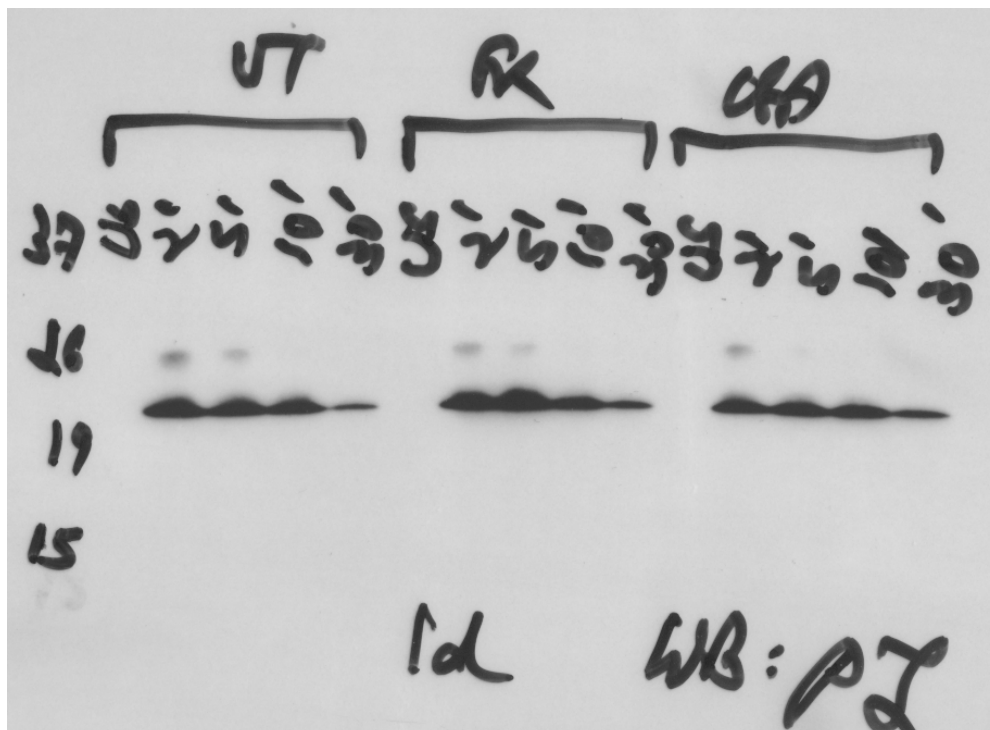

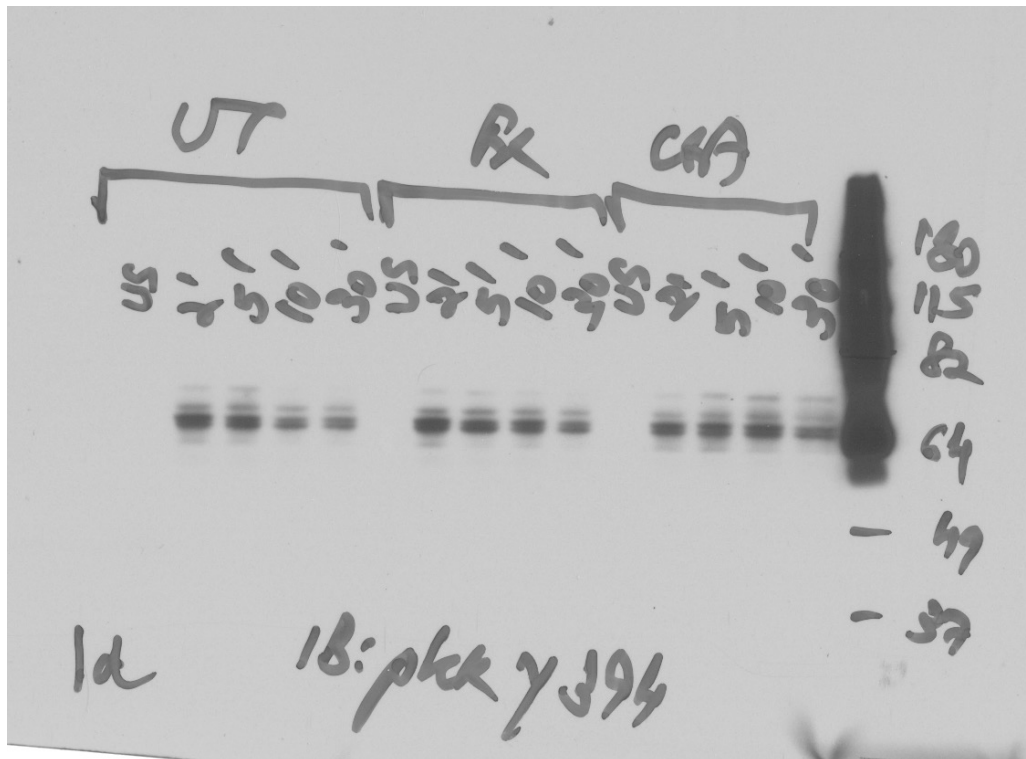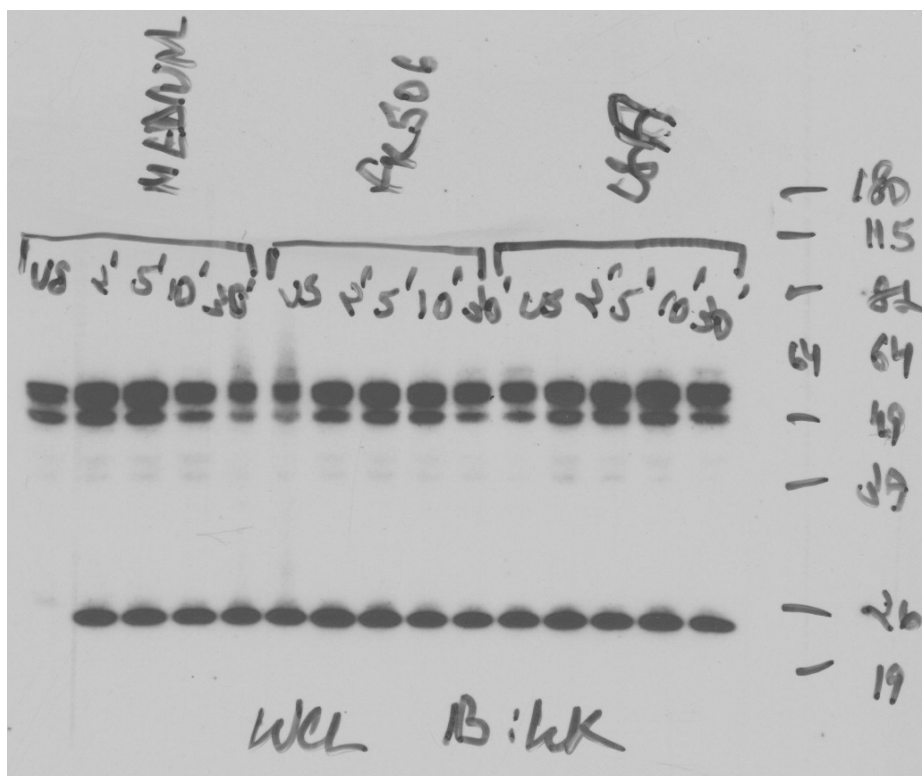

Figure 1e.

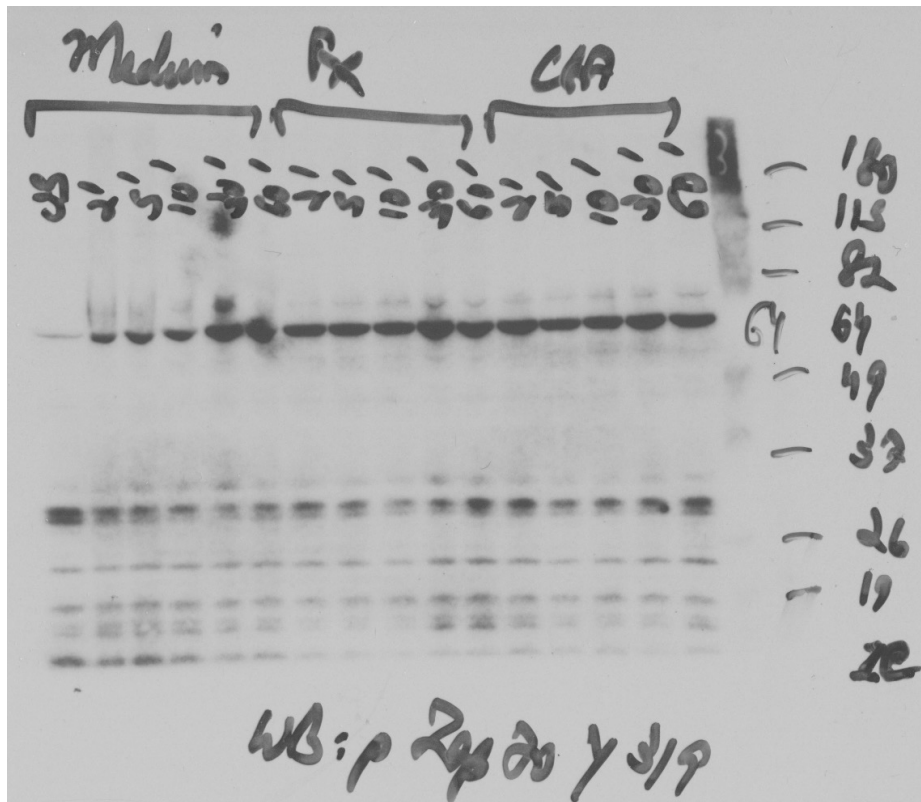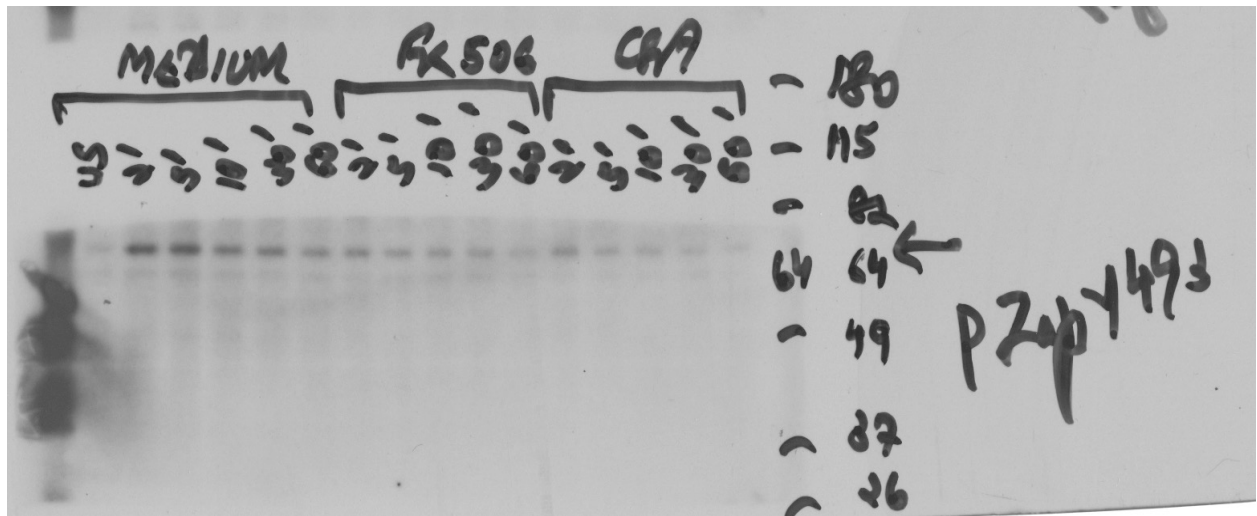

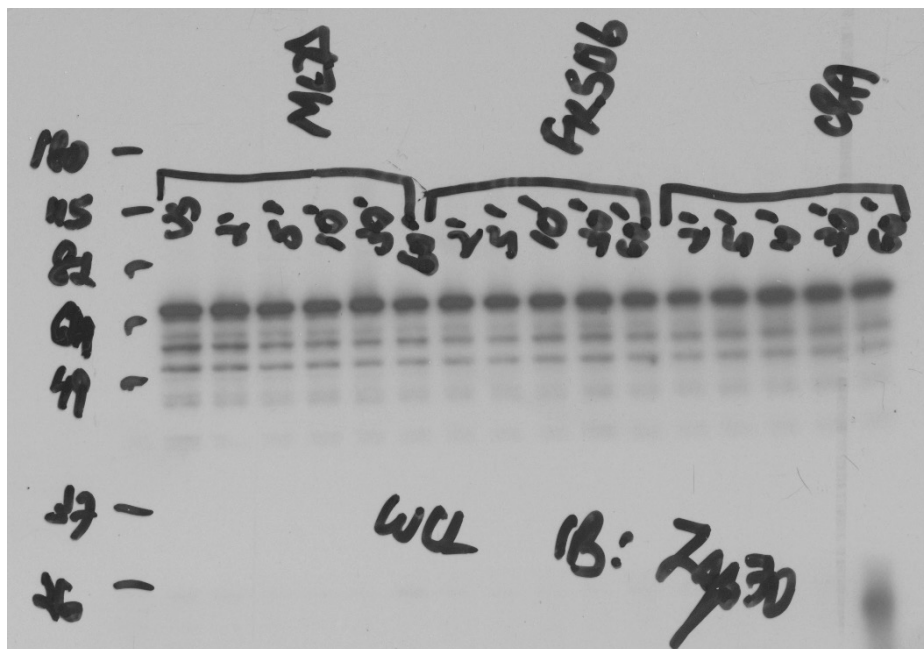

Figure 1f.

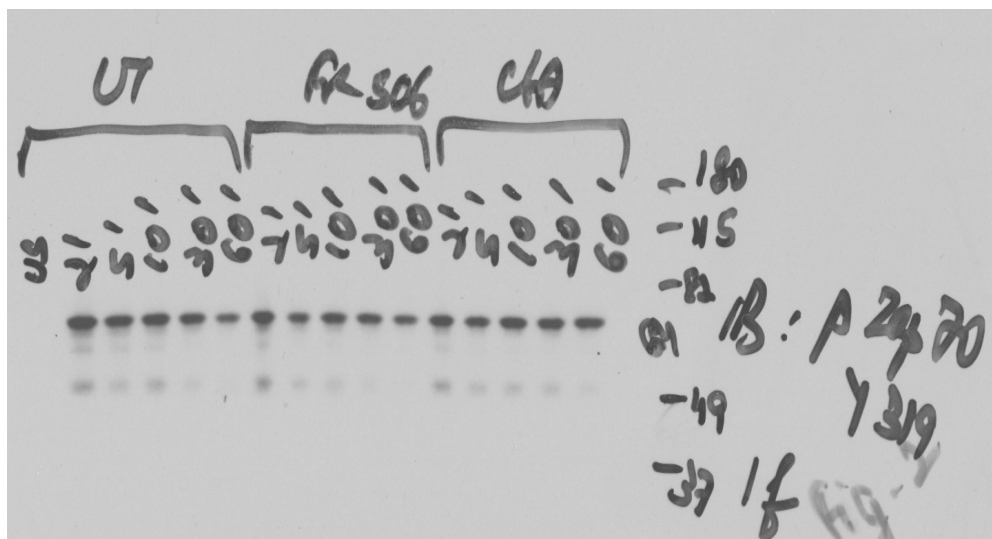

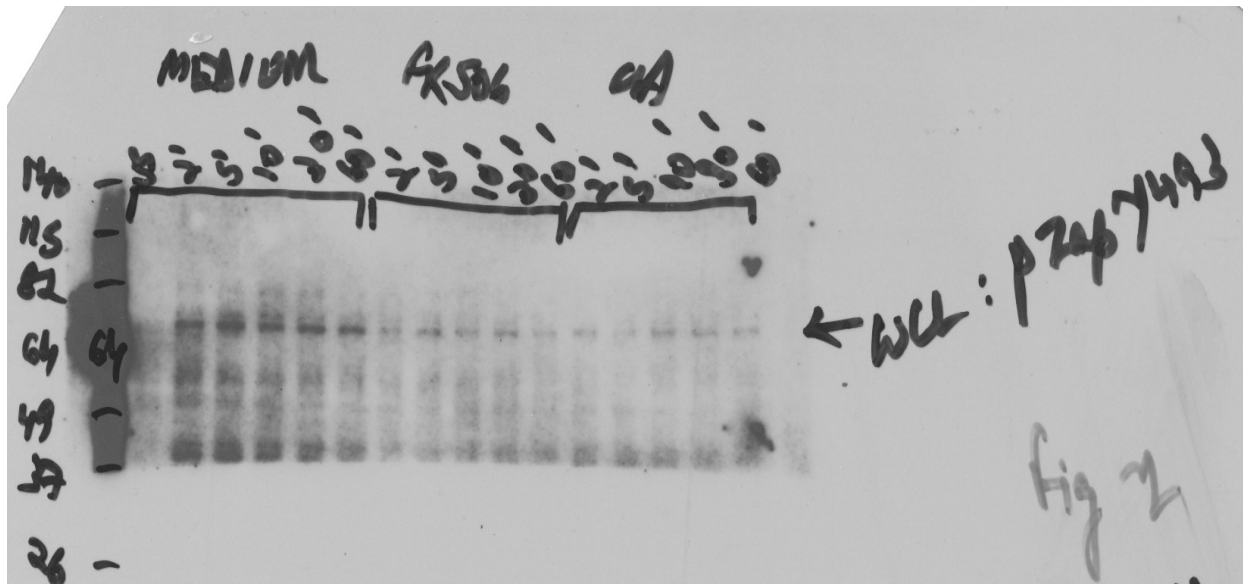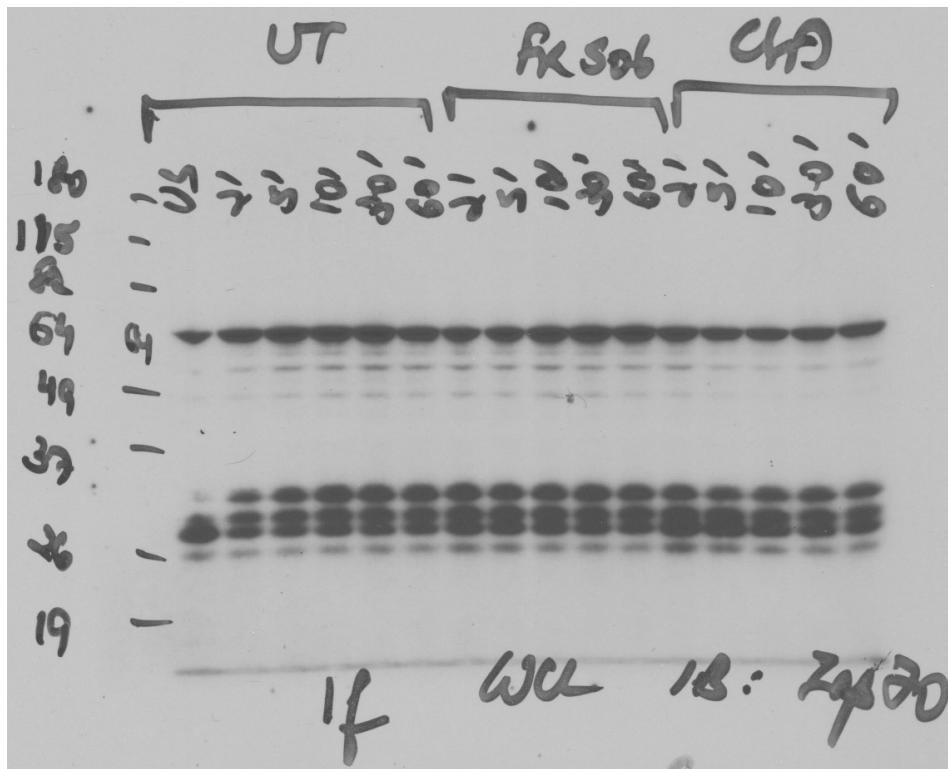

Figure 1g.

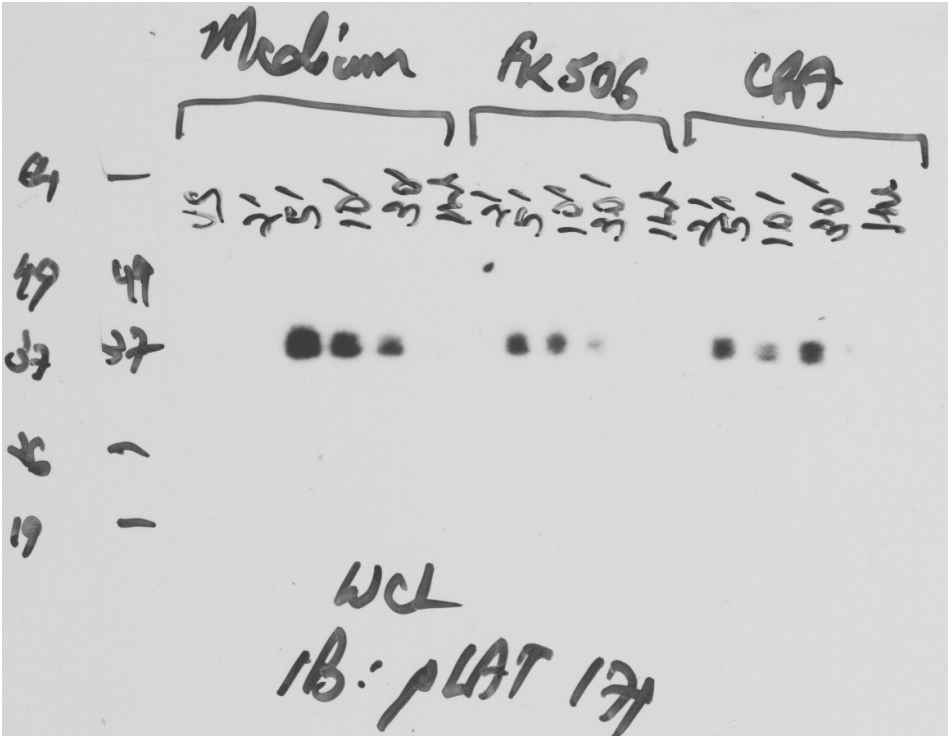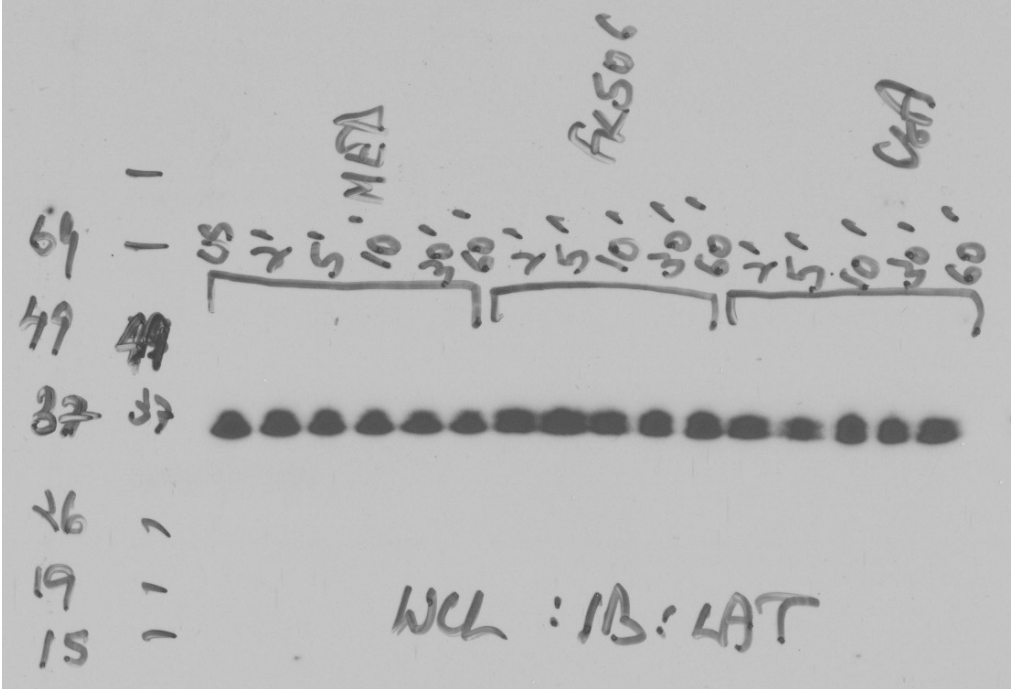

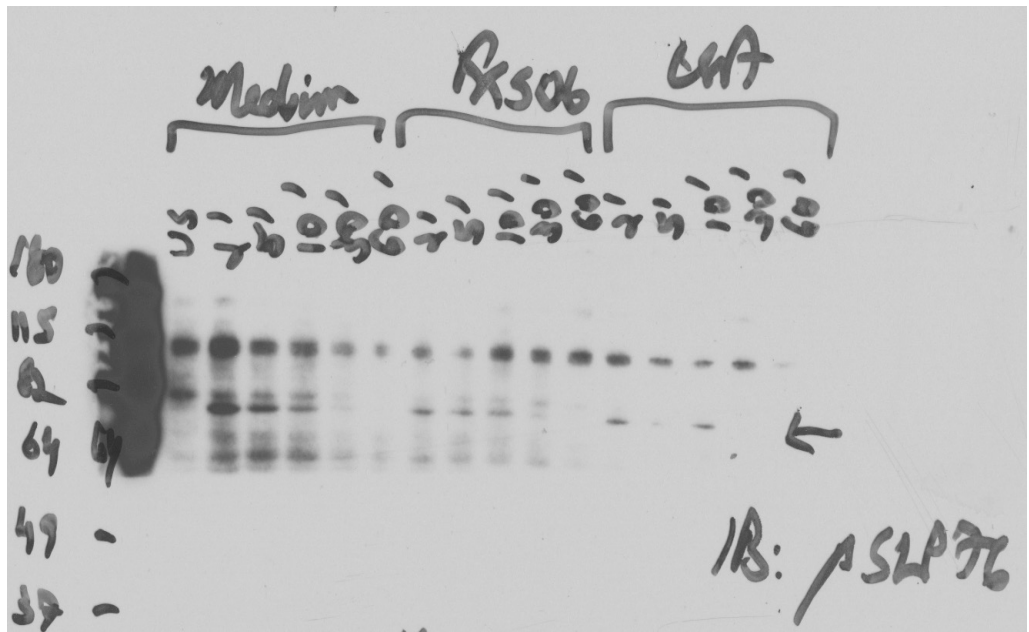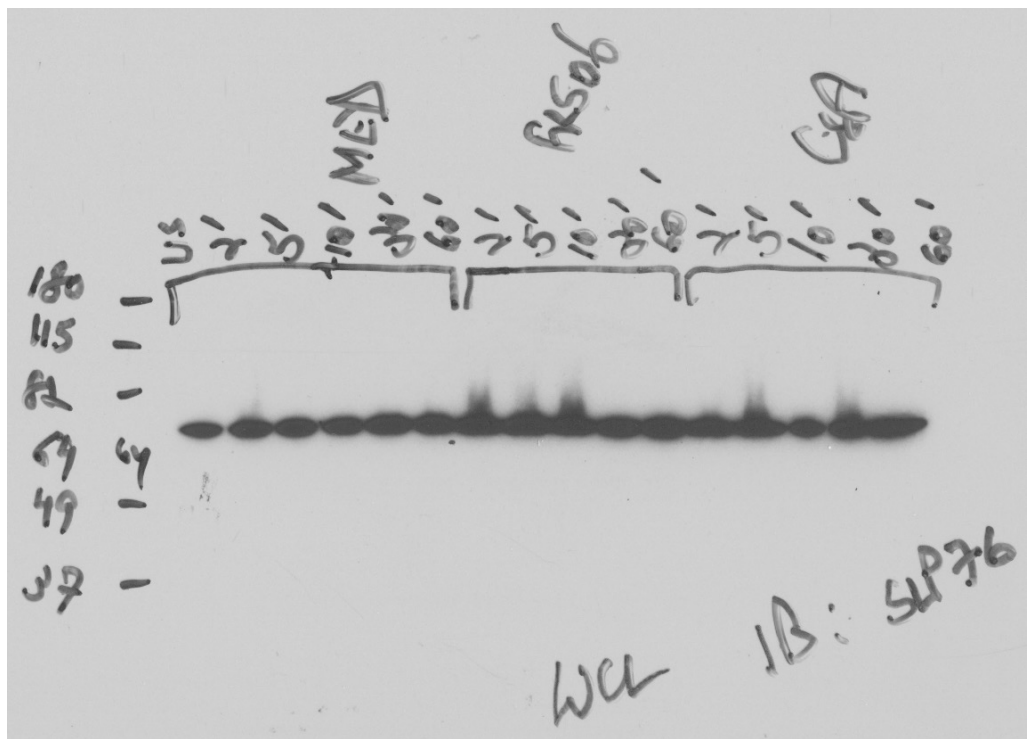



Figure 1h.

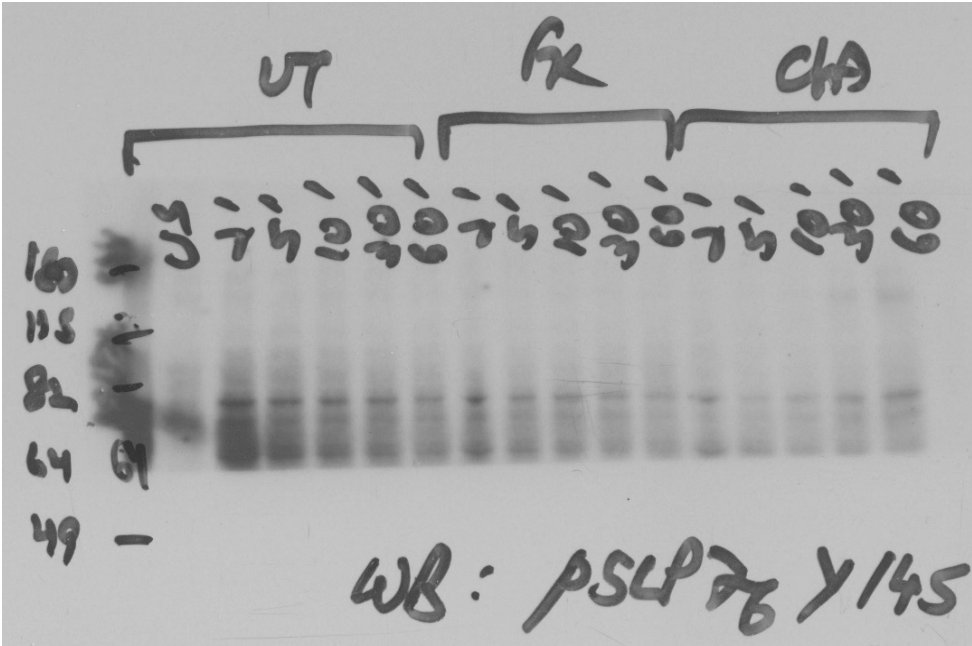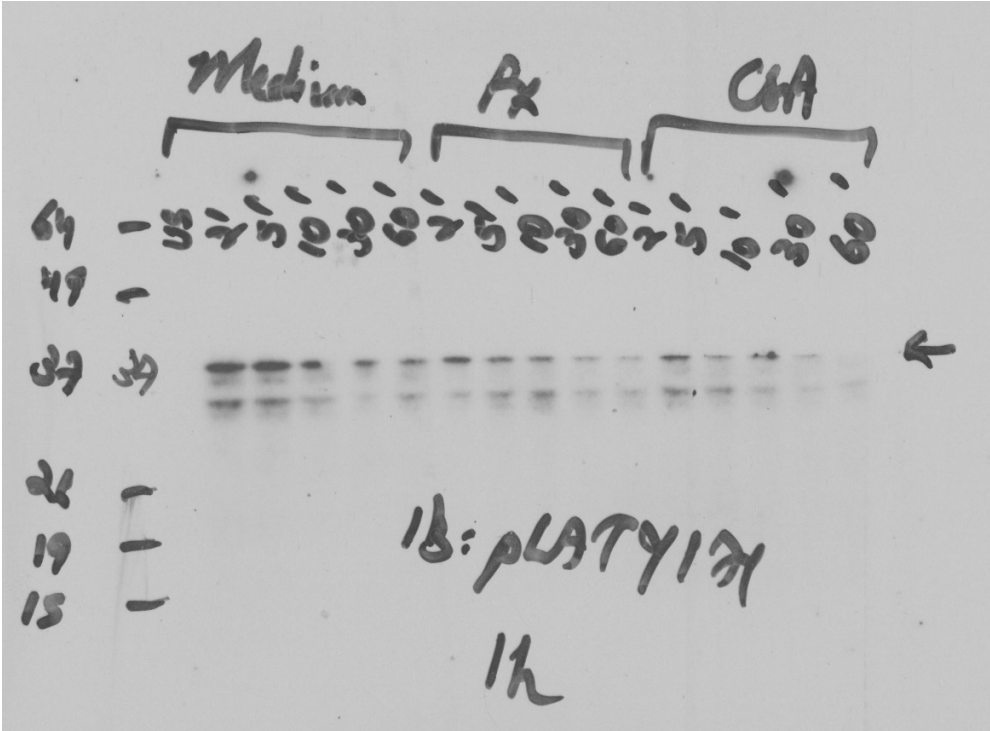

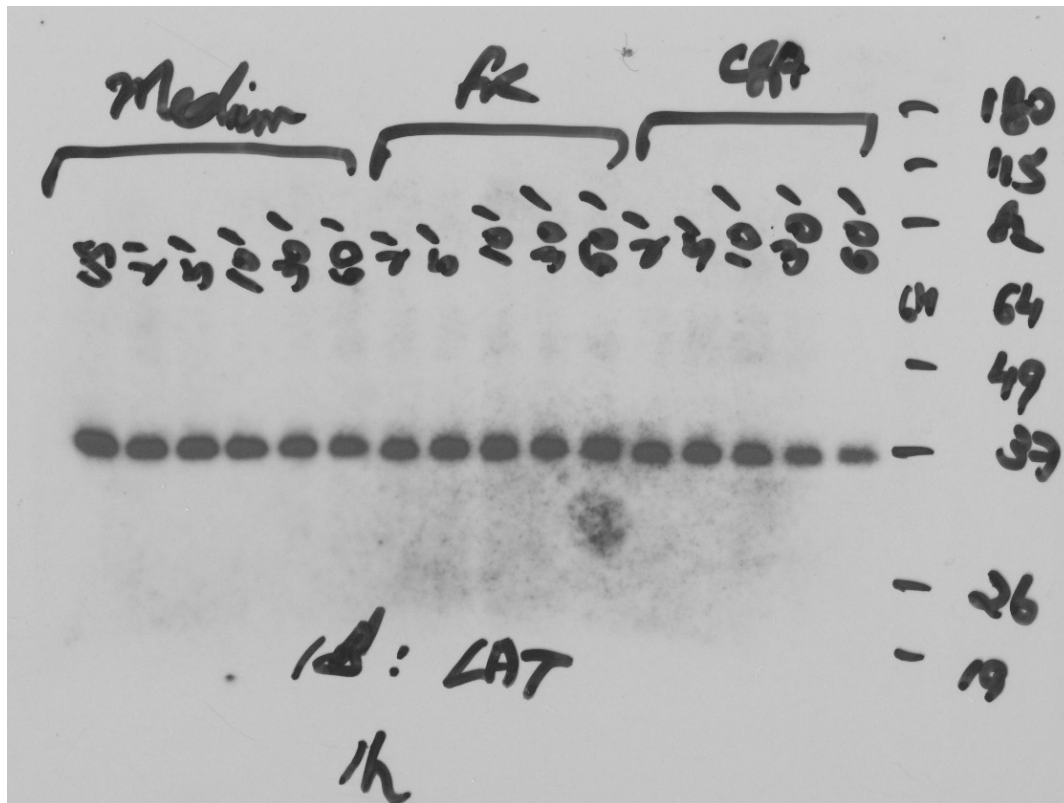

Figure 1i.

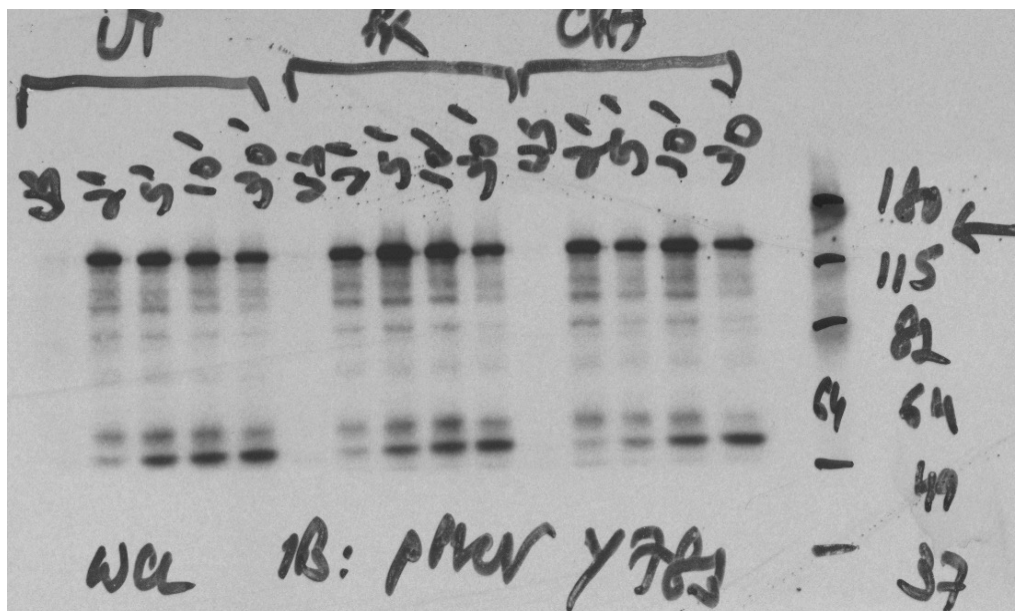

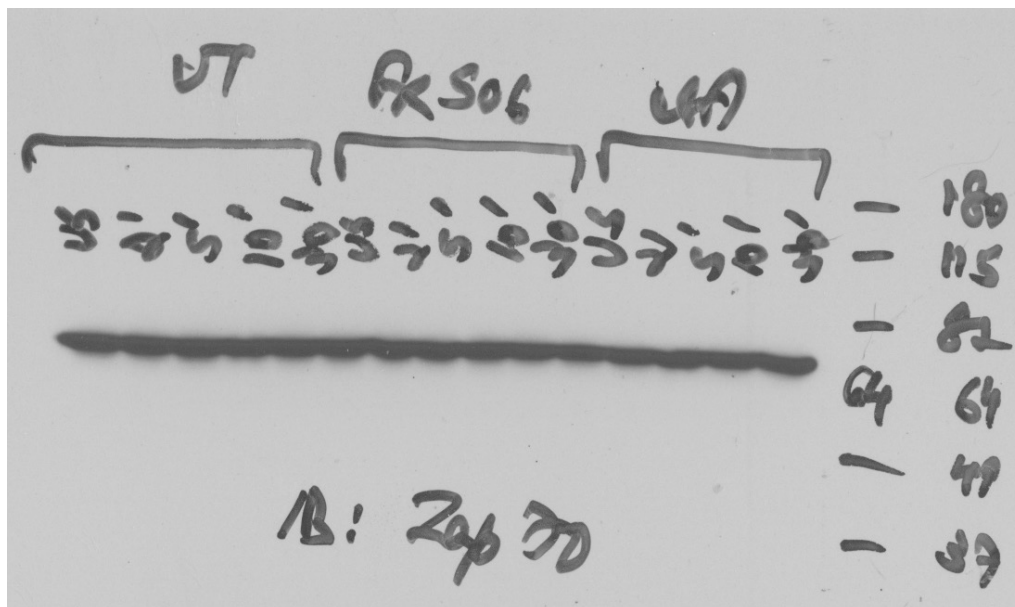

Figure 1j.

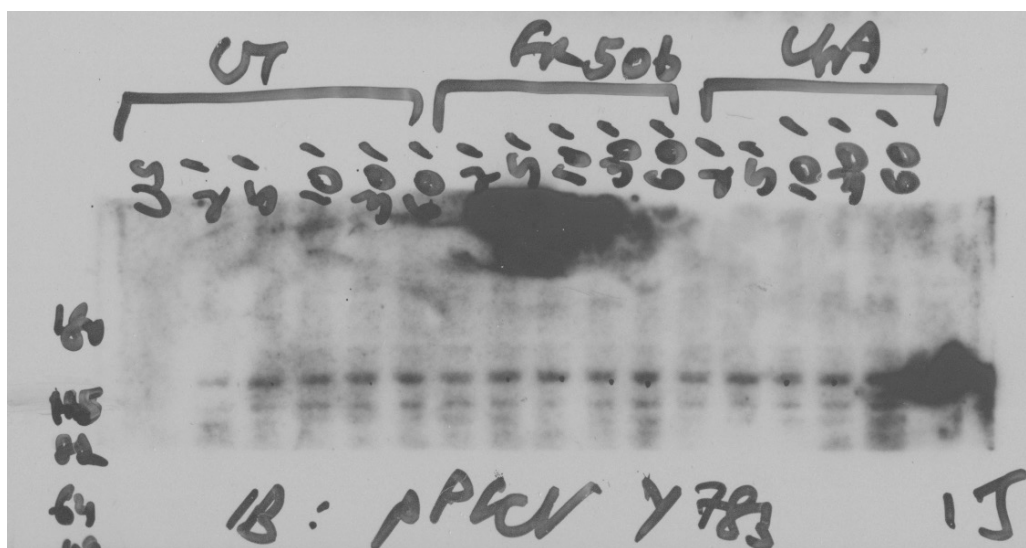

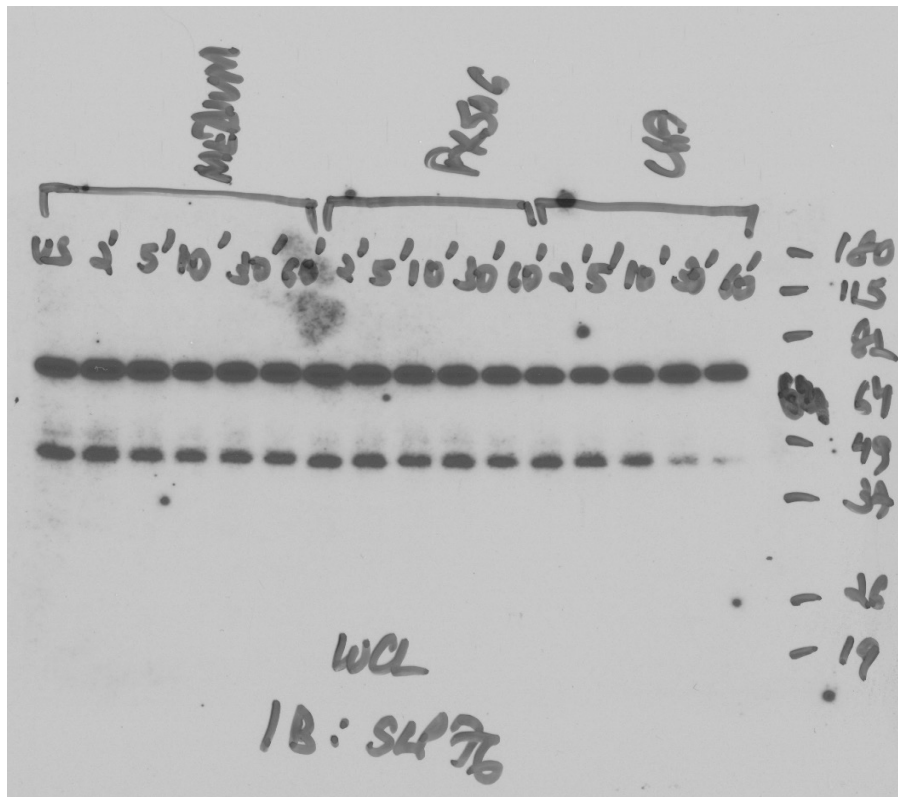

Figure 1 continued.

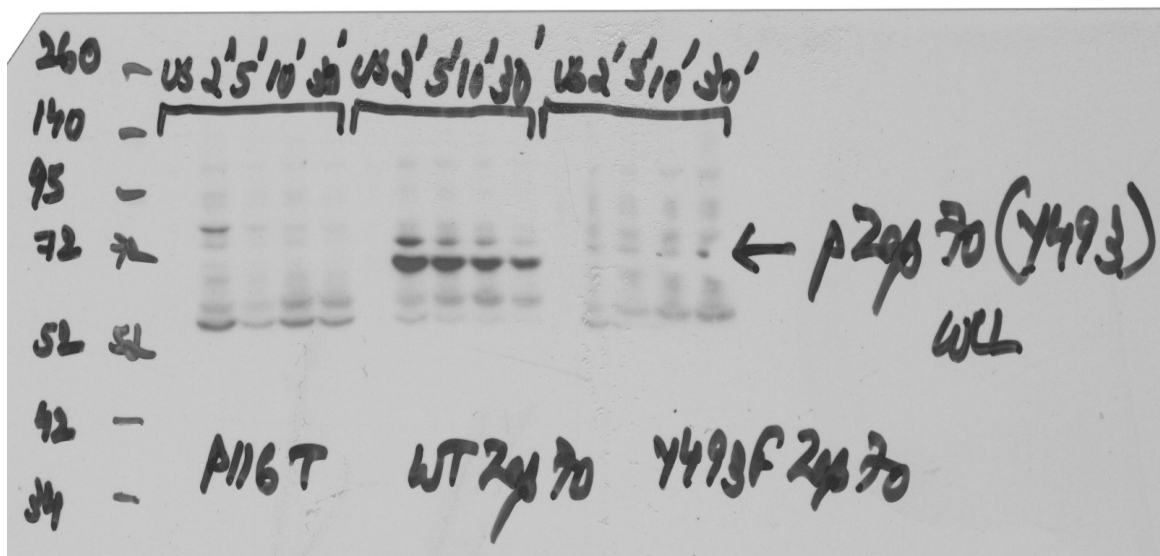

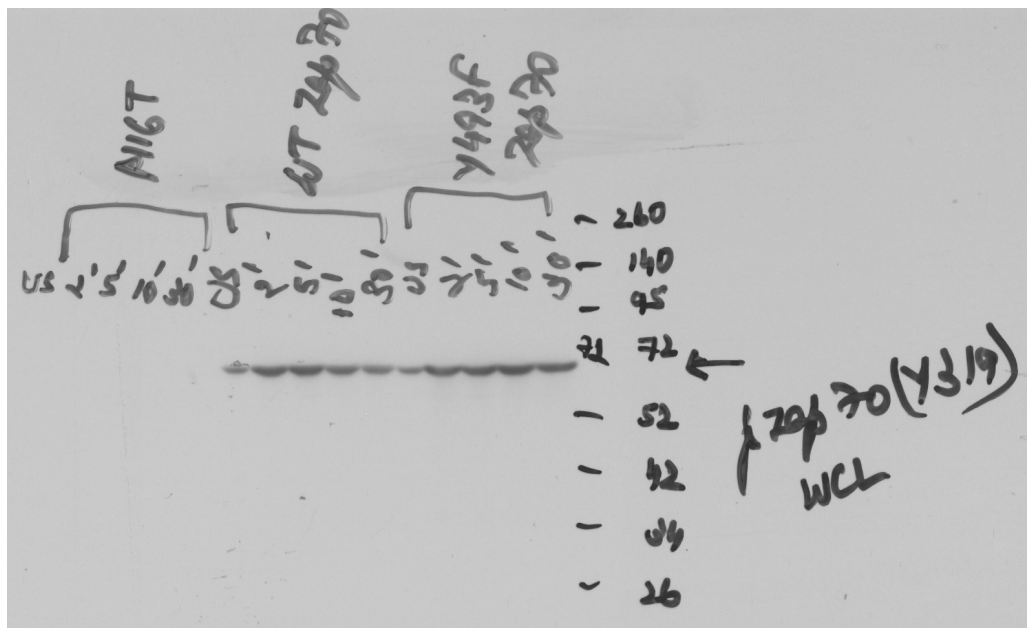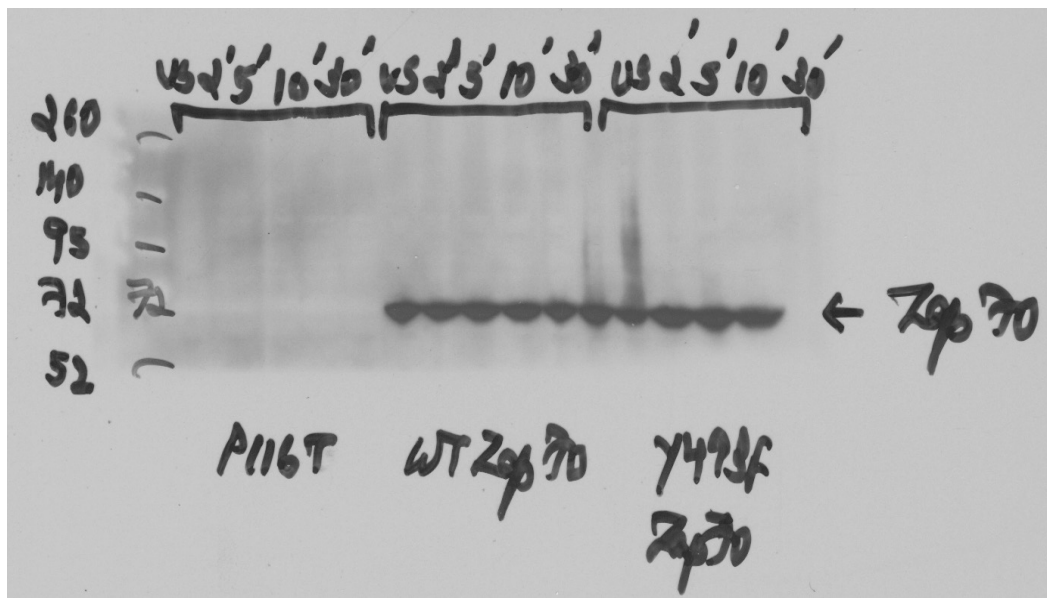

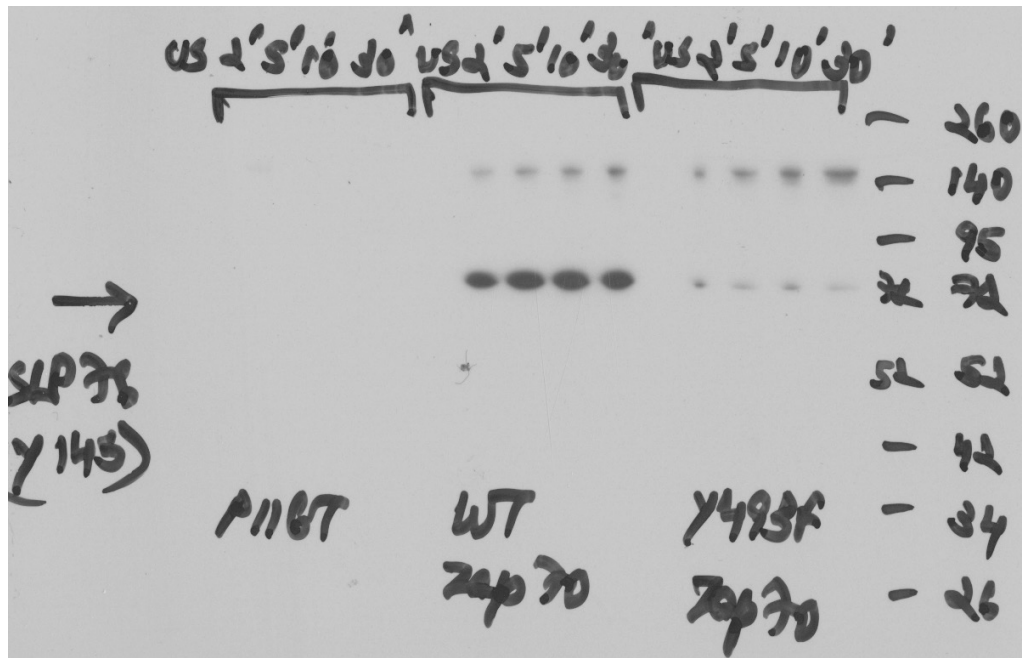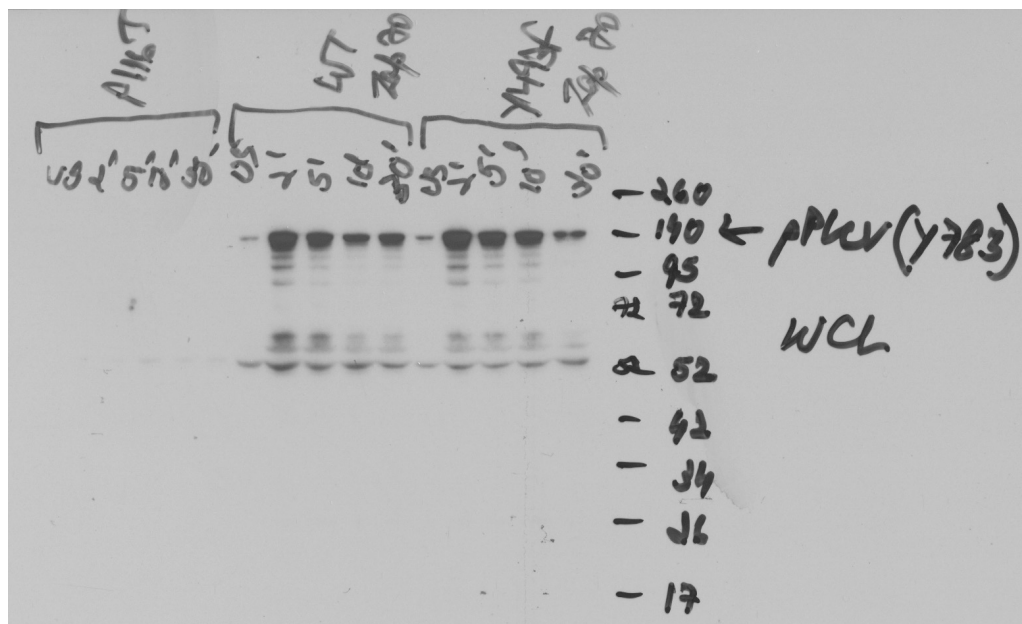

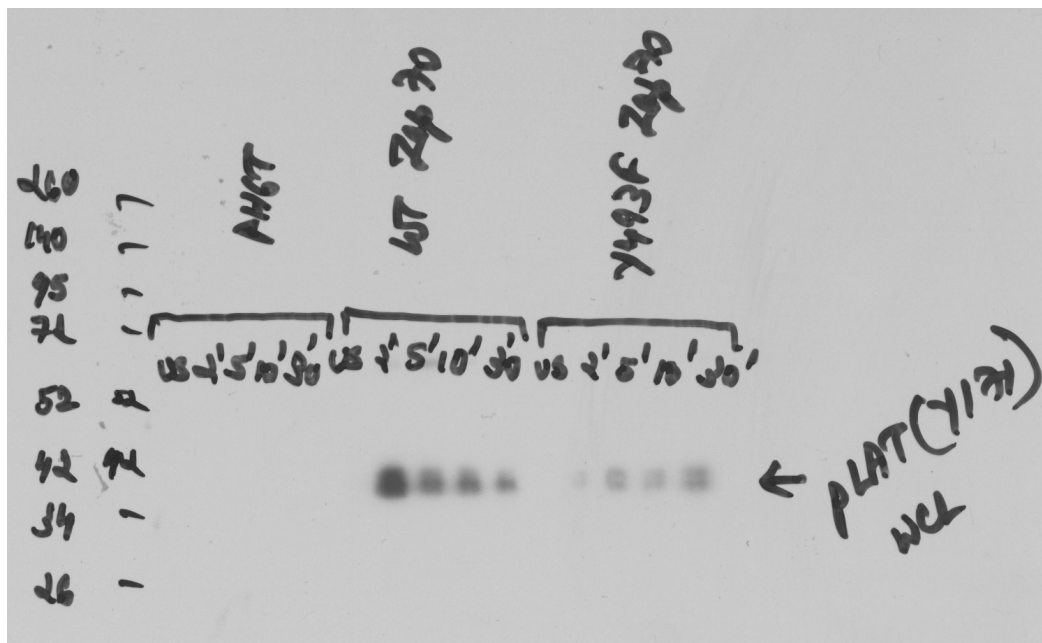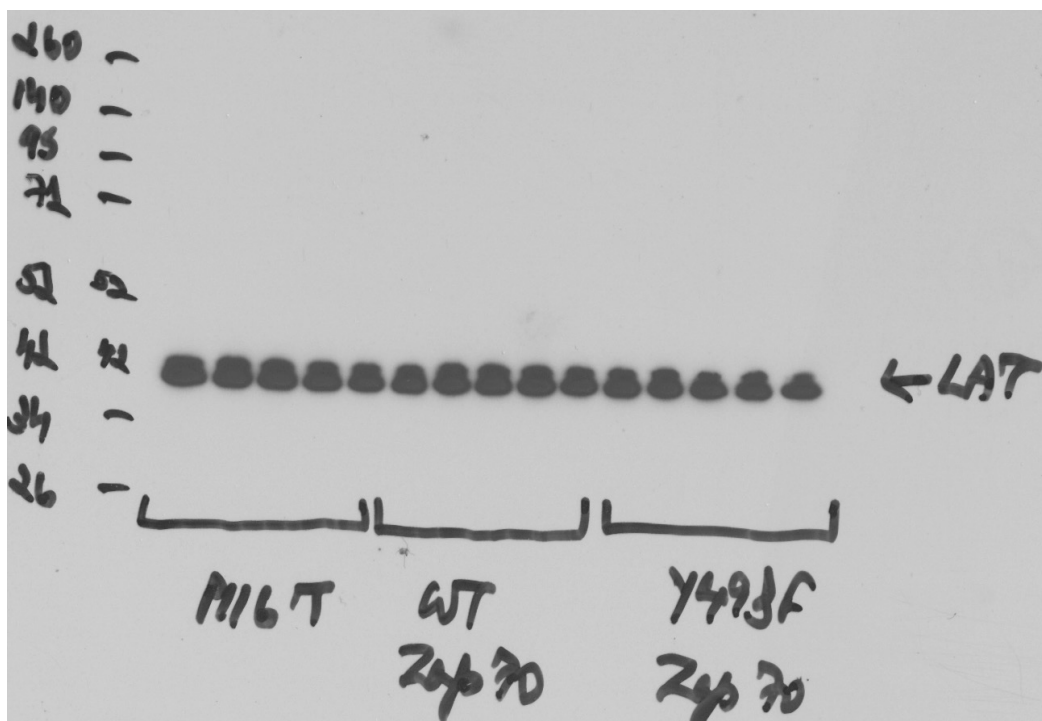



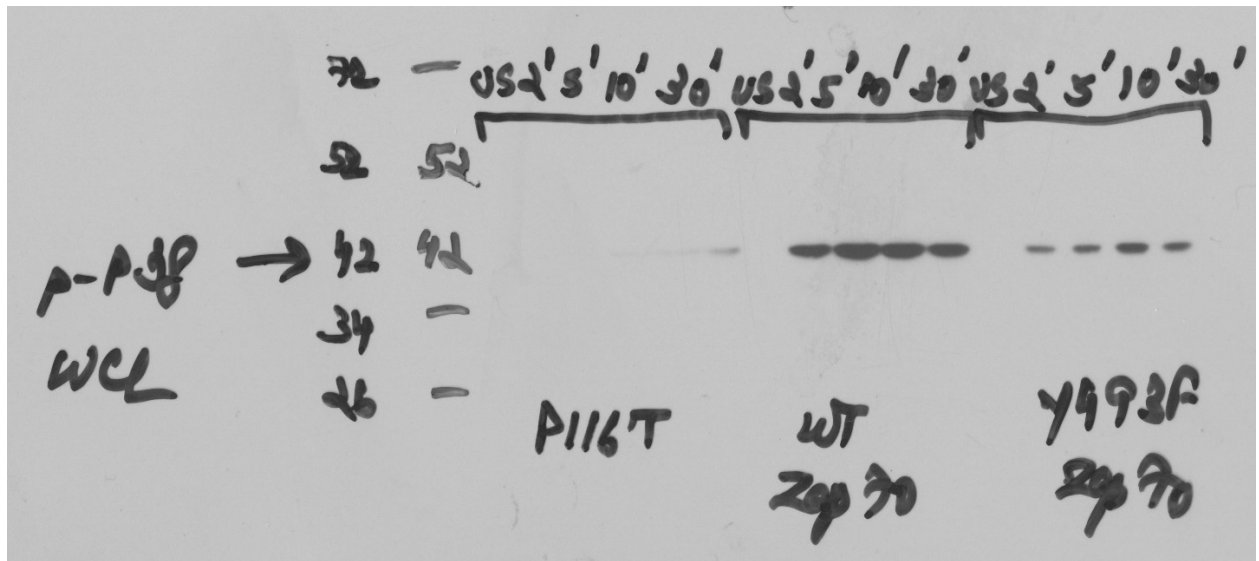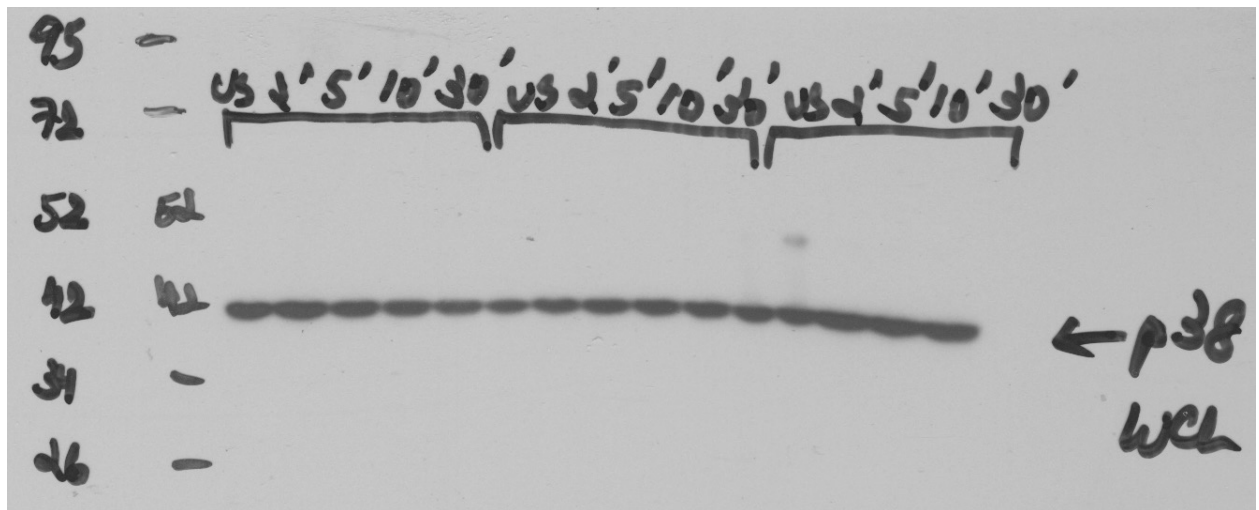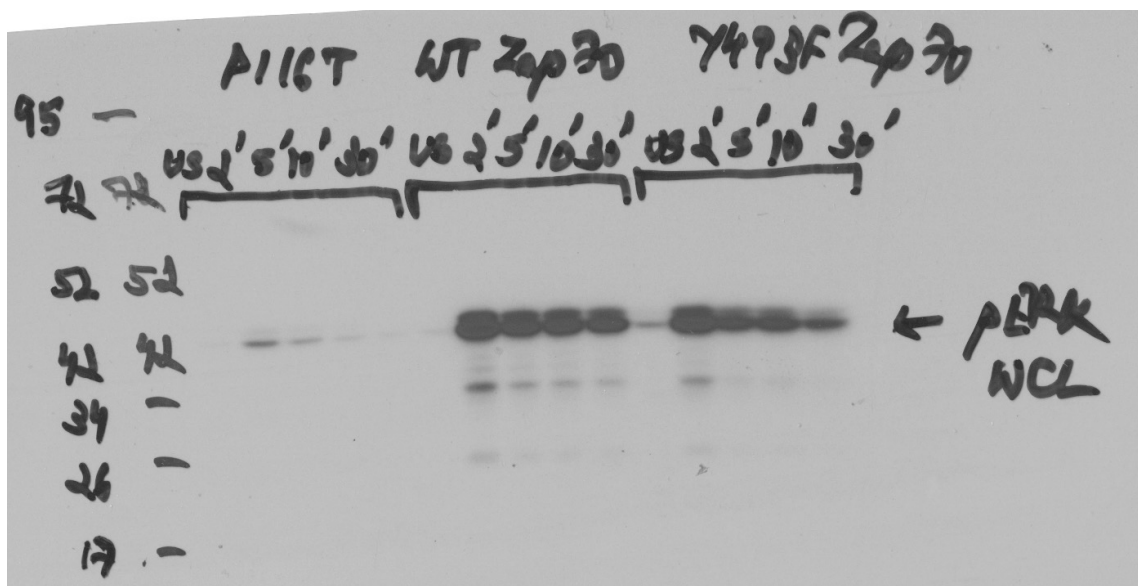



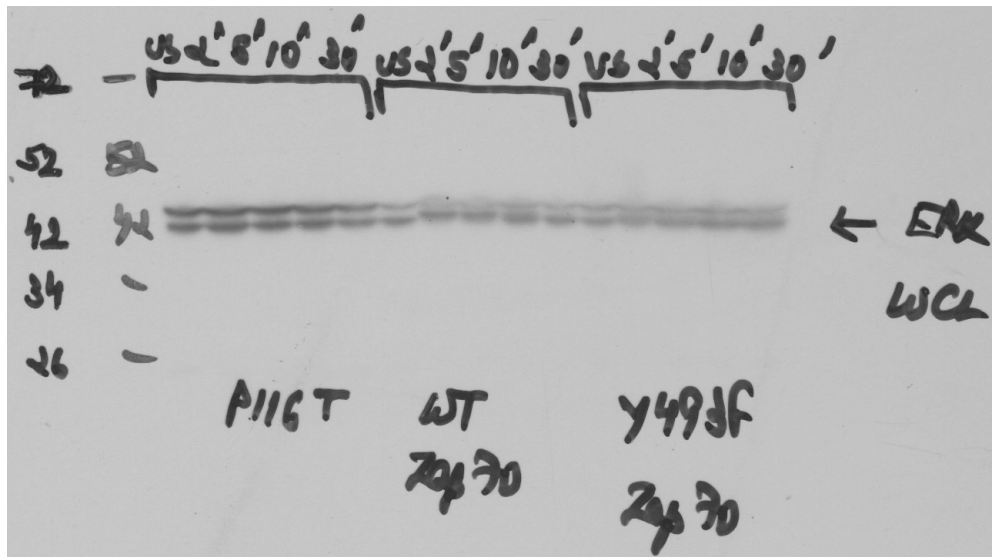

Figure 2a.

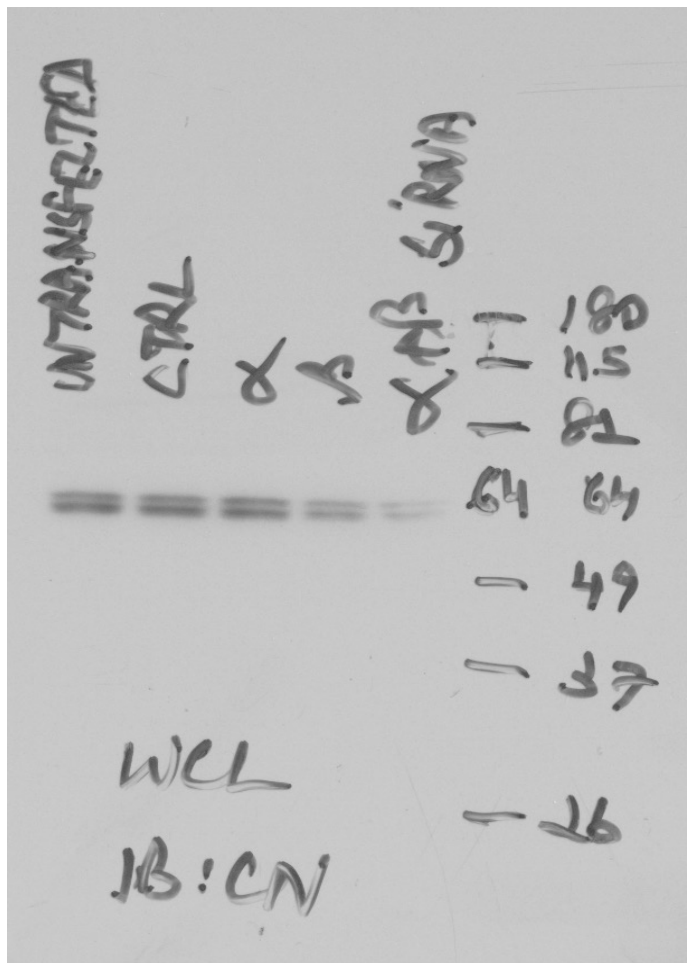

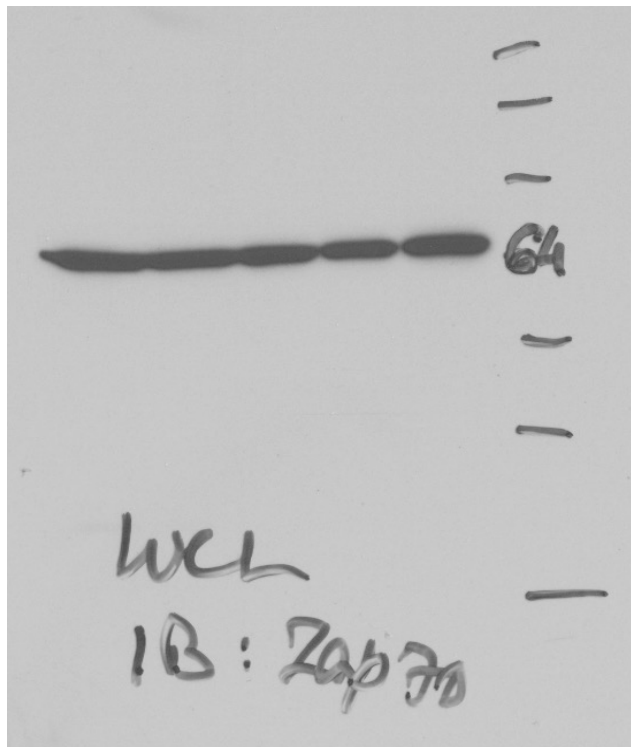

Figure 2b.

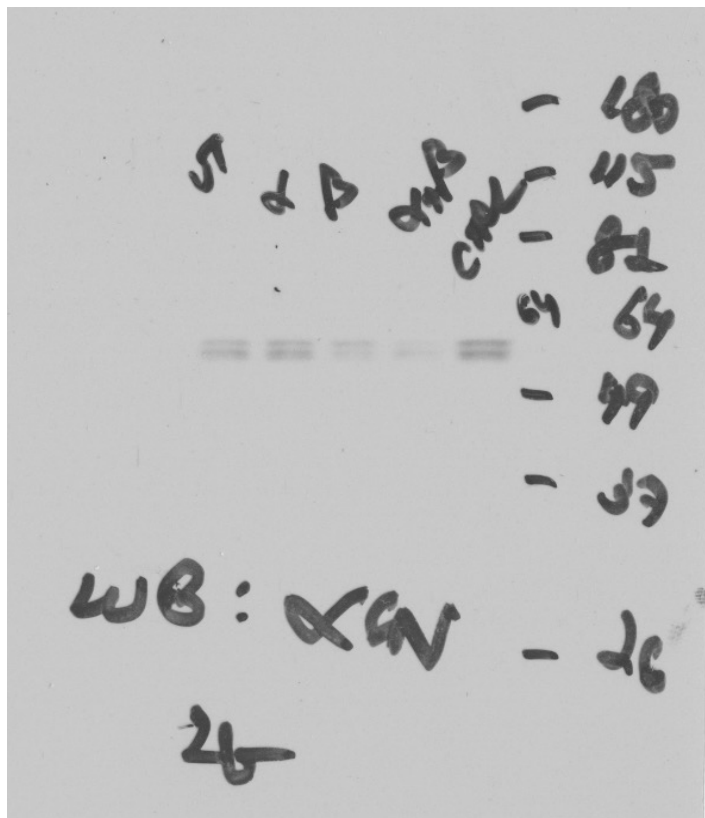

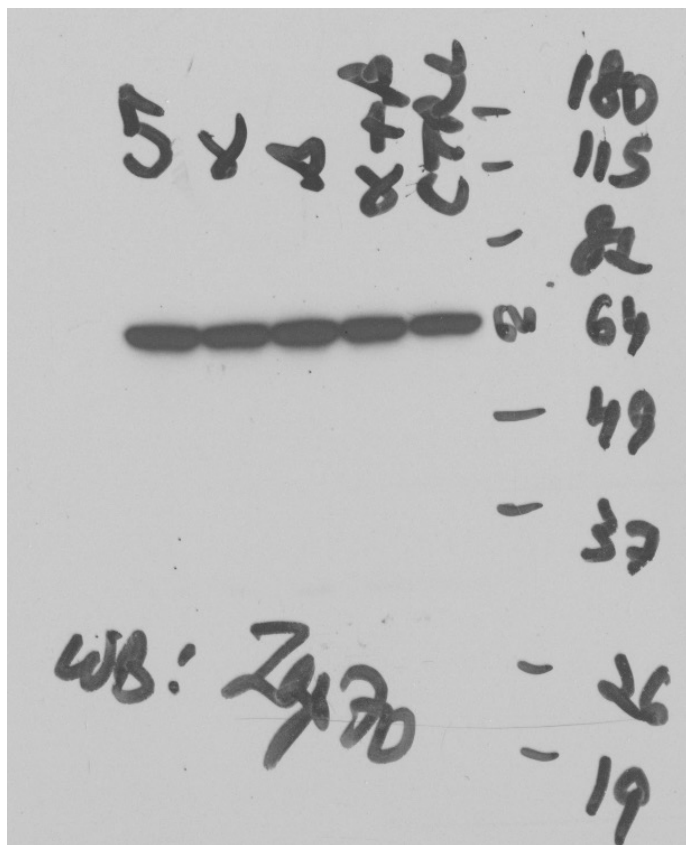

Figure 2c.

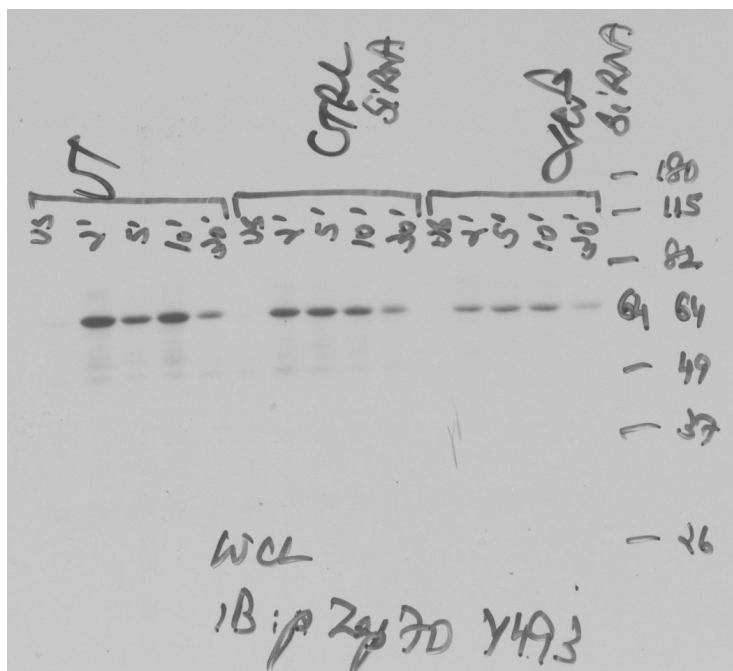

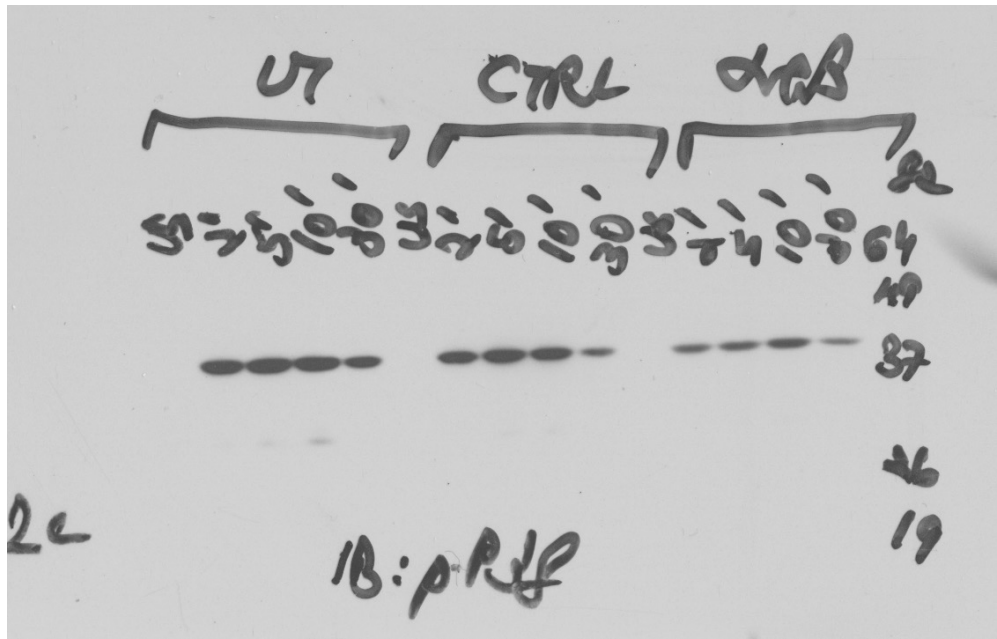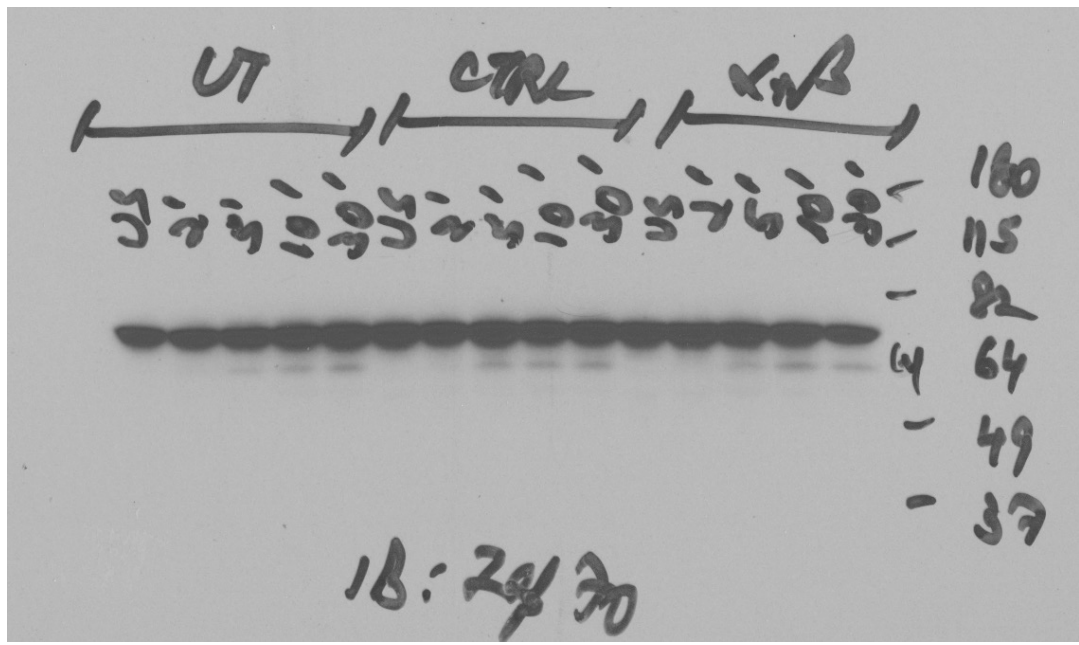

Figure 2d.

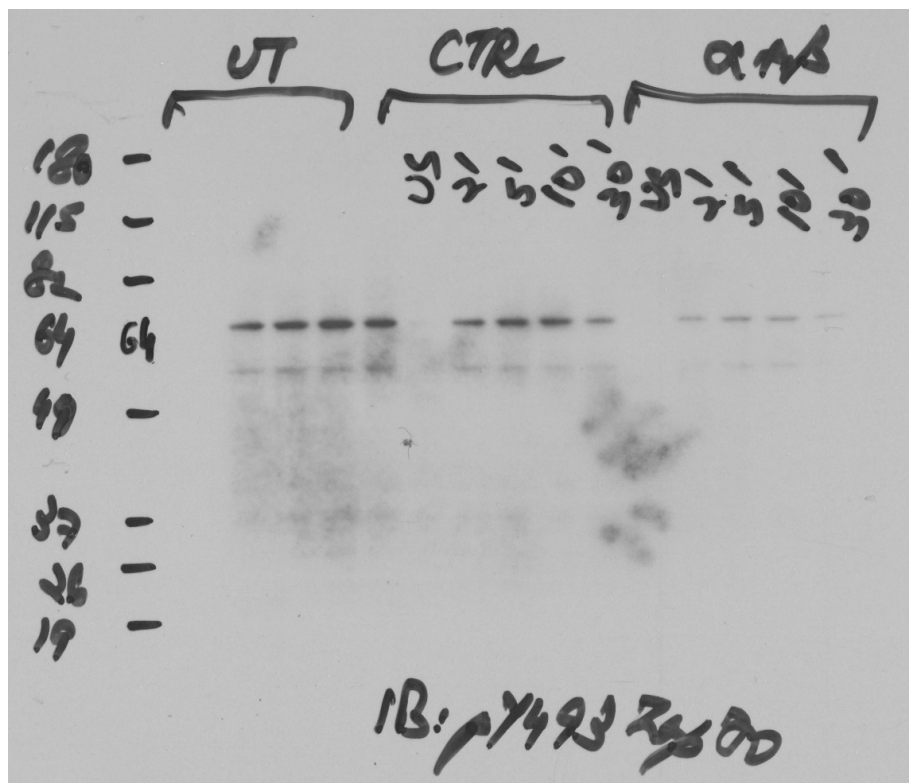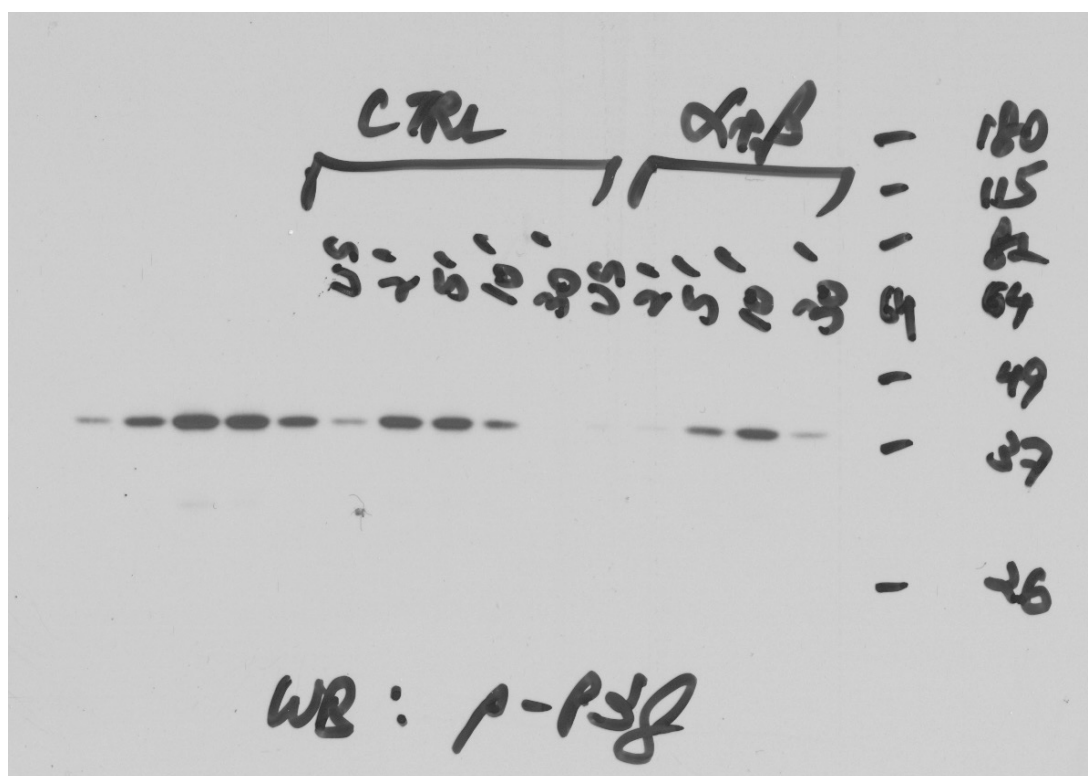

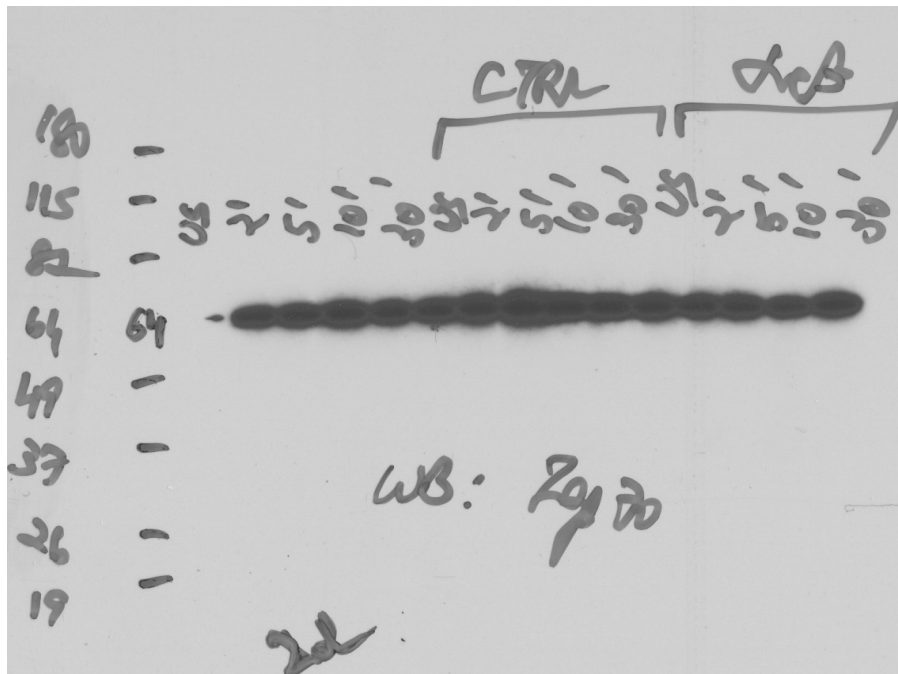

Figure 2e.

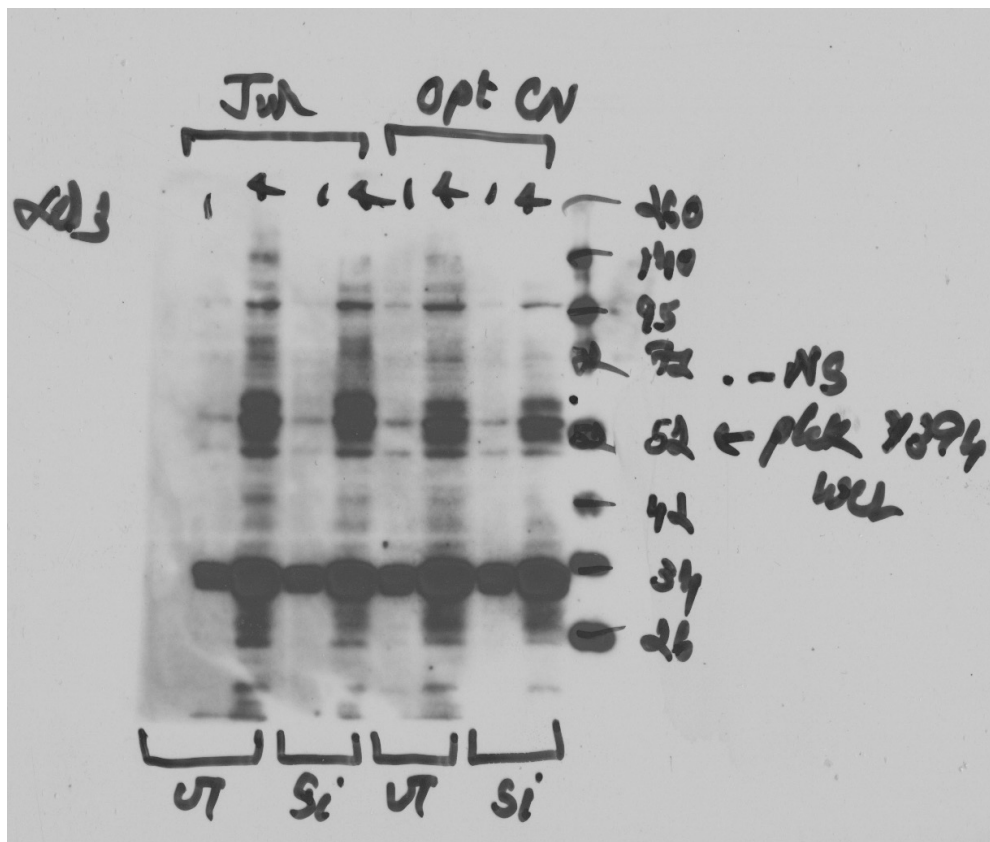

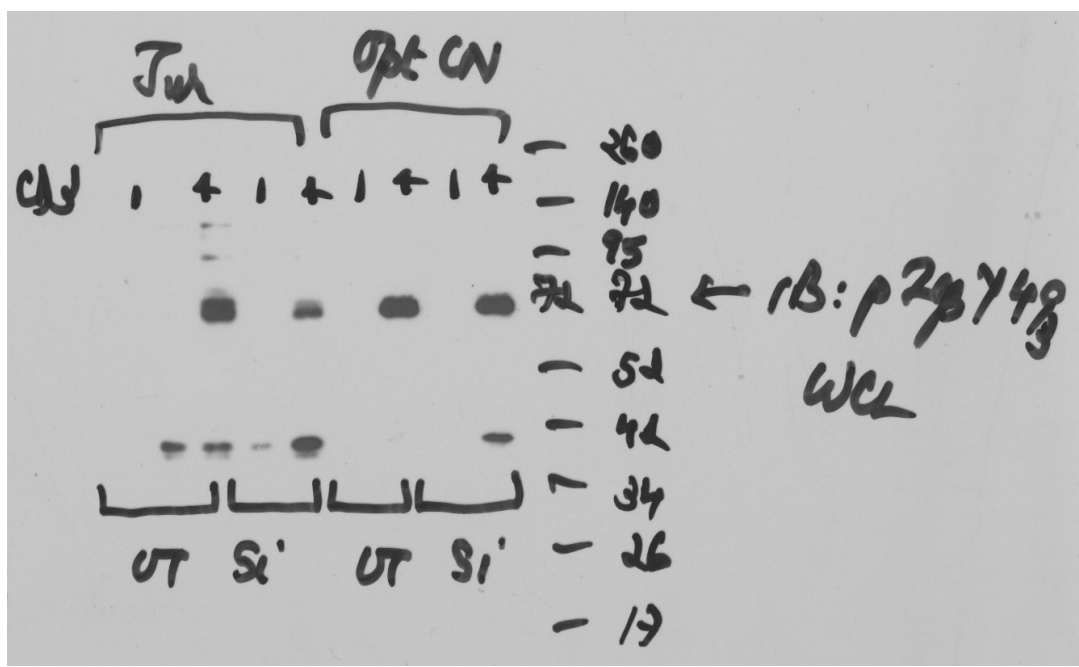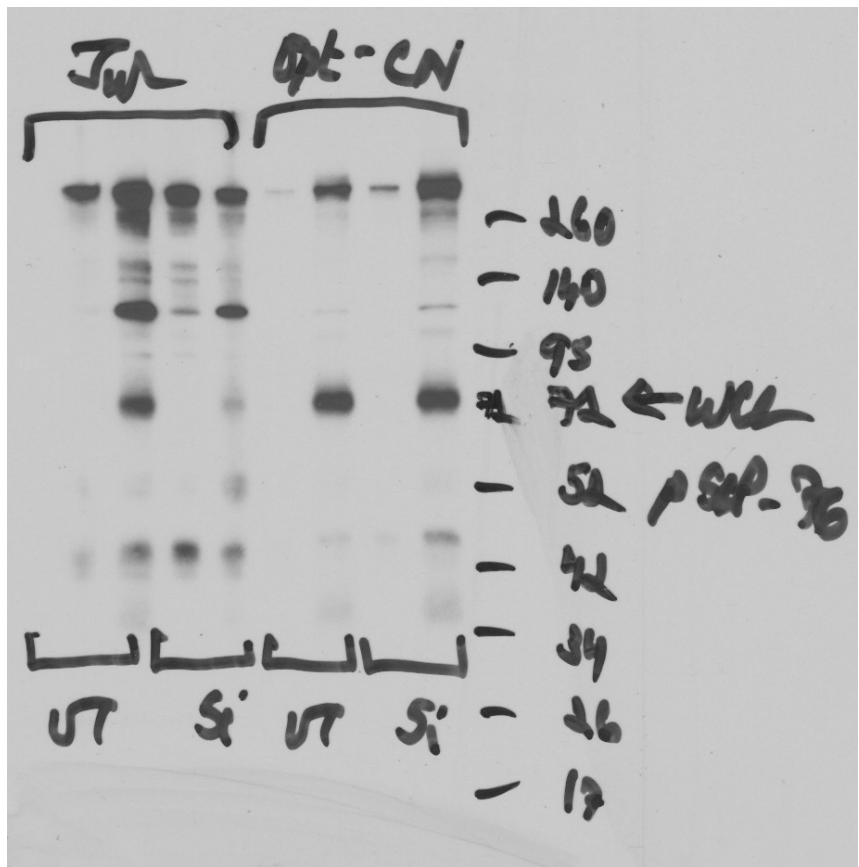





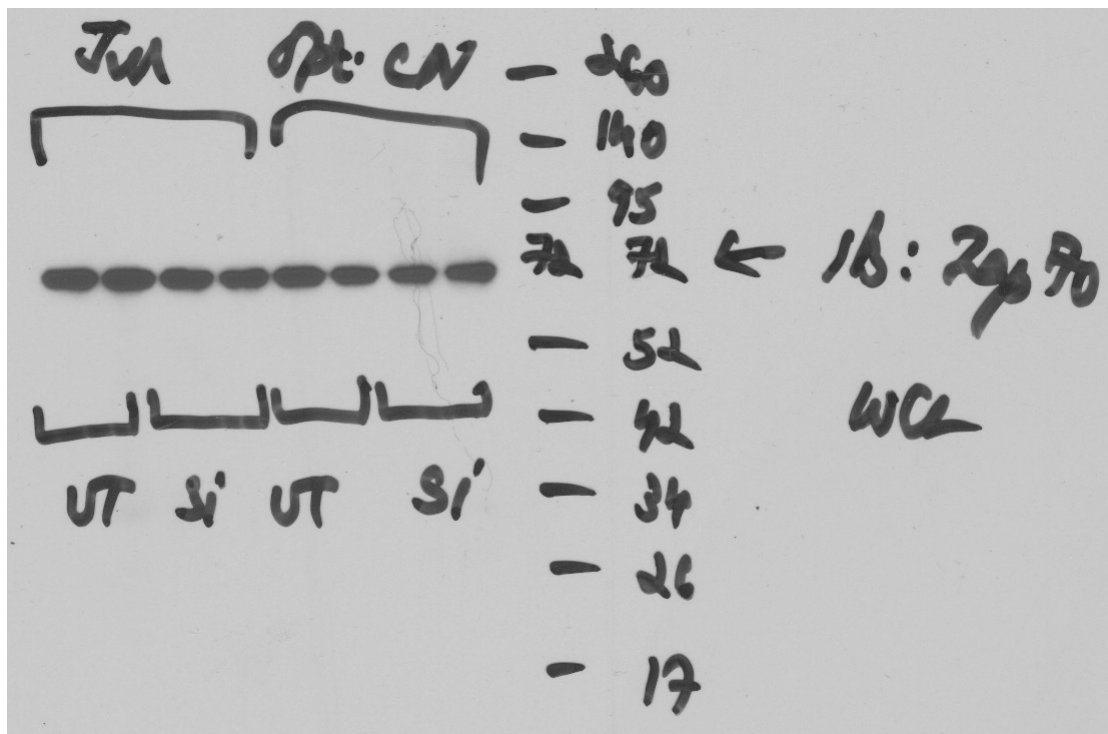

Figure 5a.

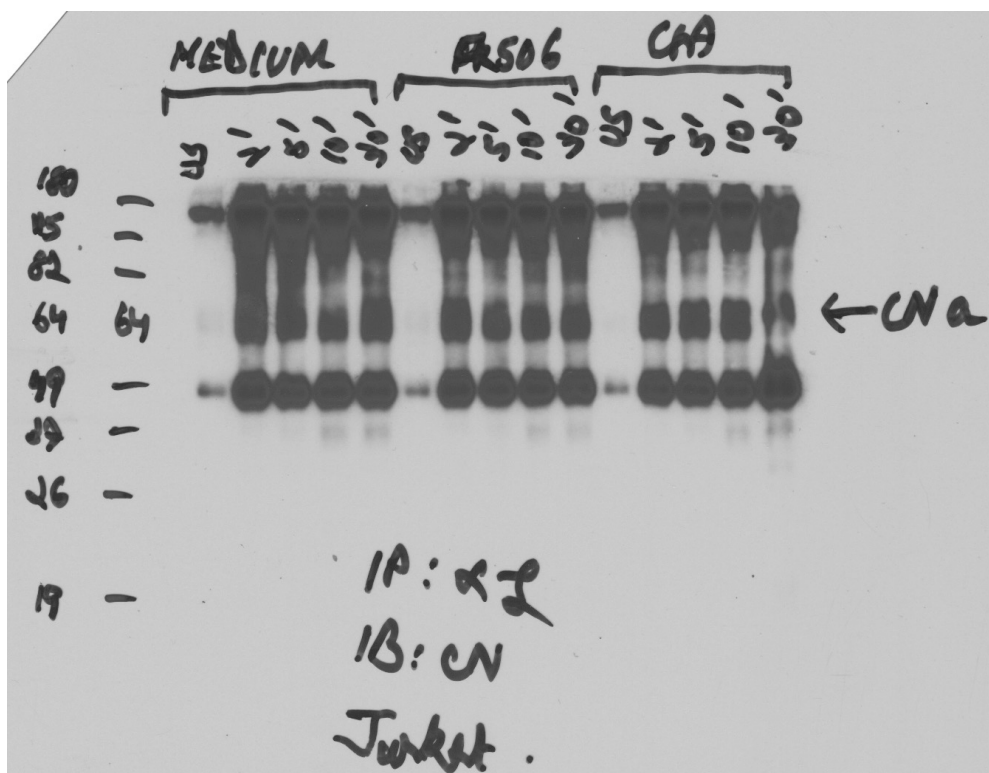

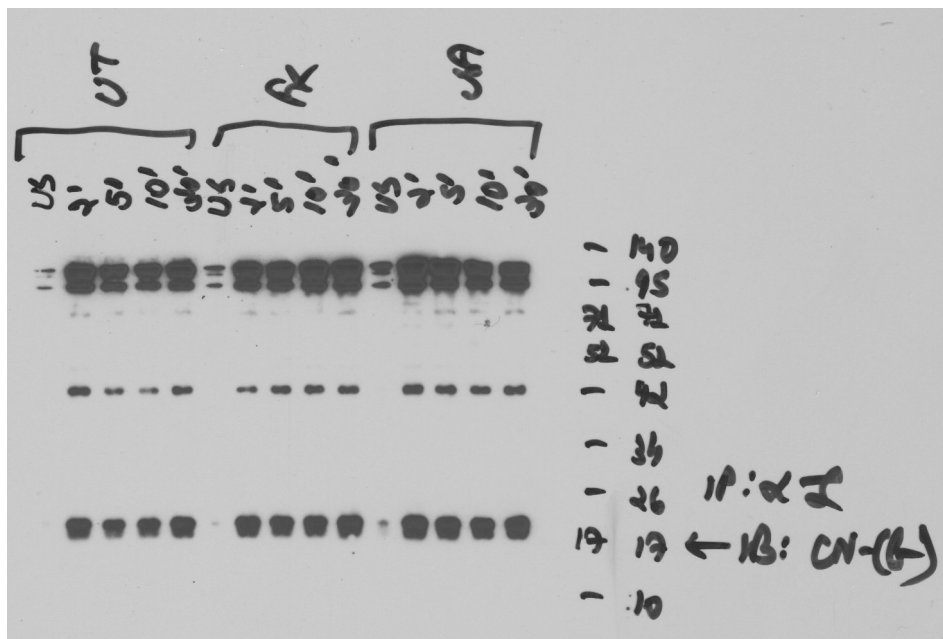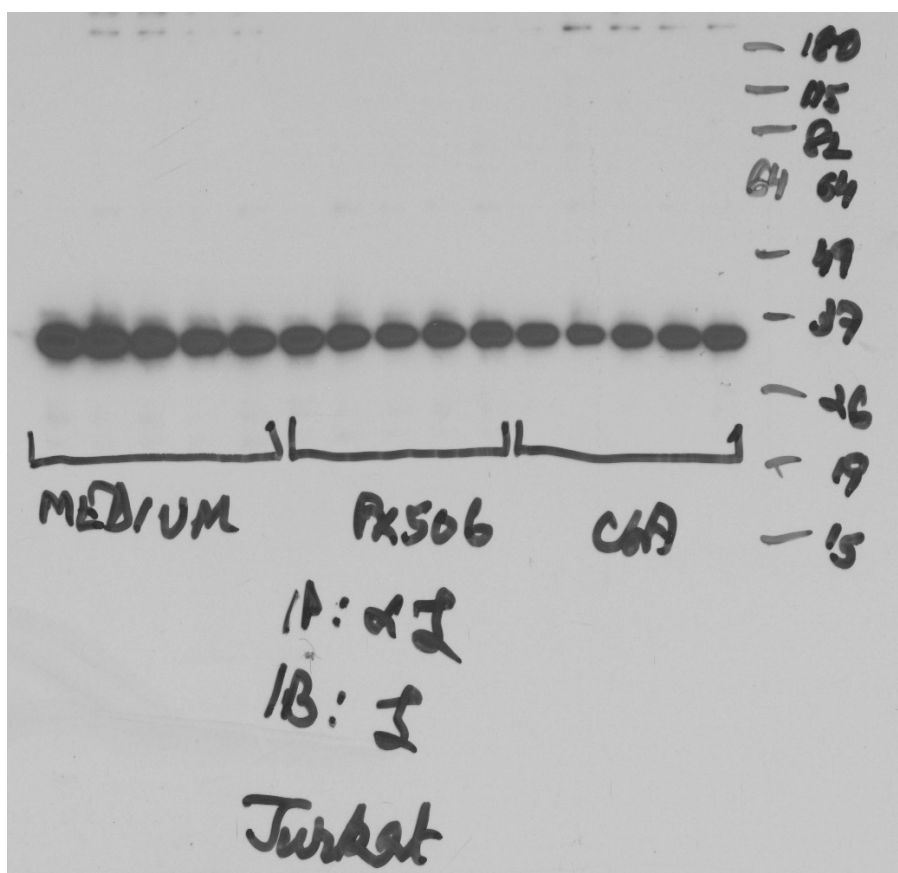

Figure 5b.

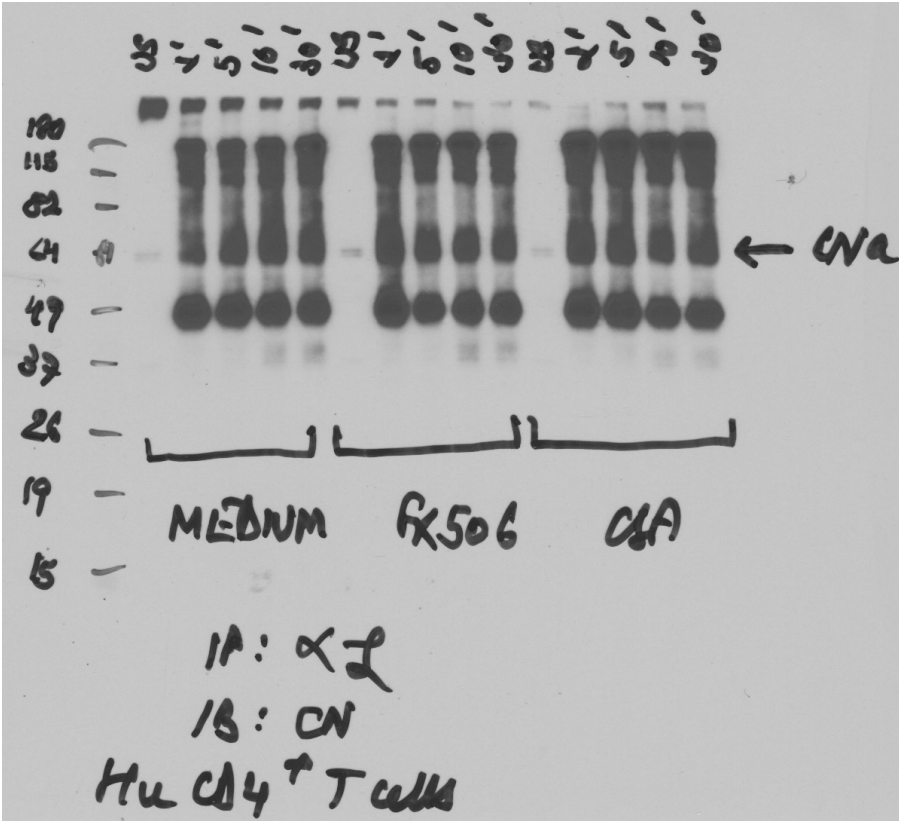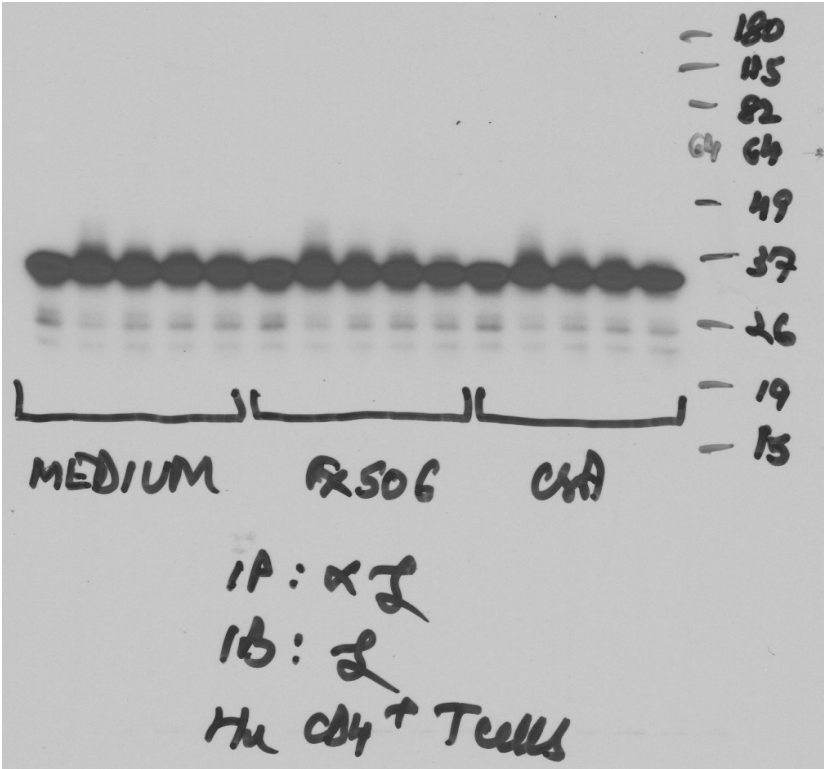

Figure 5c.

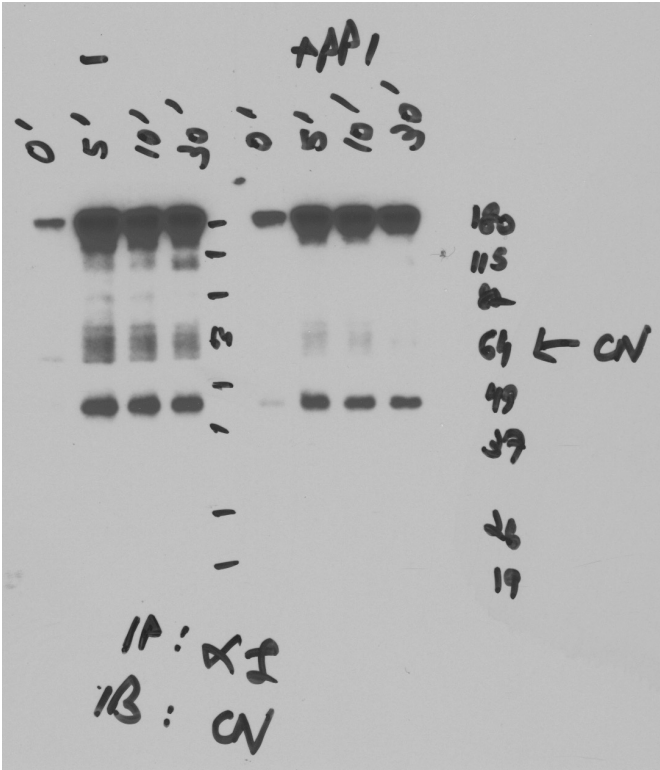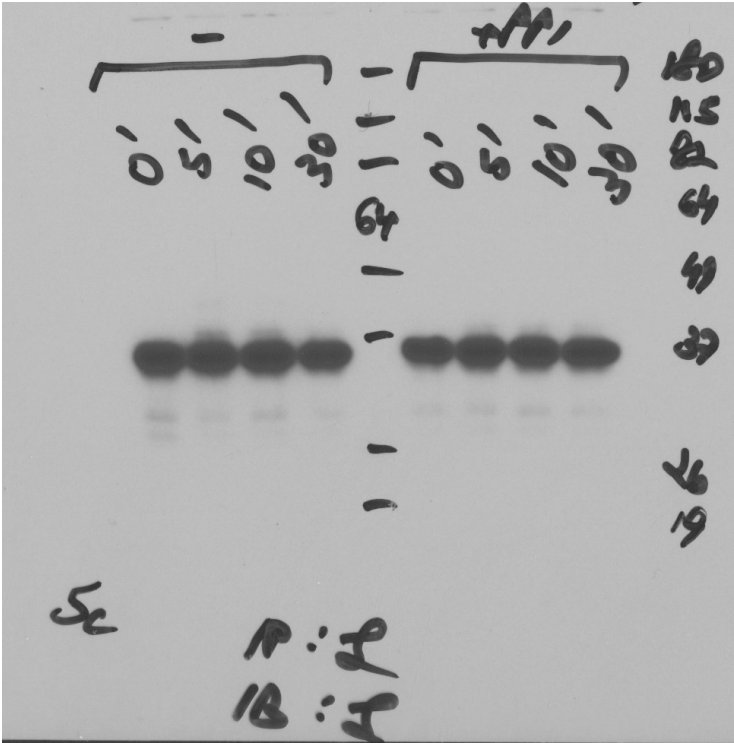

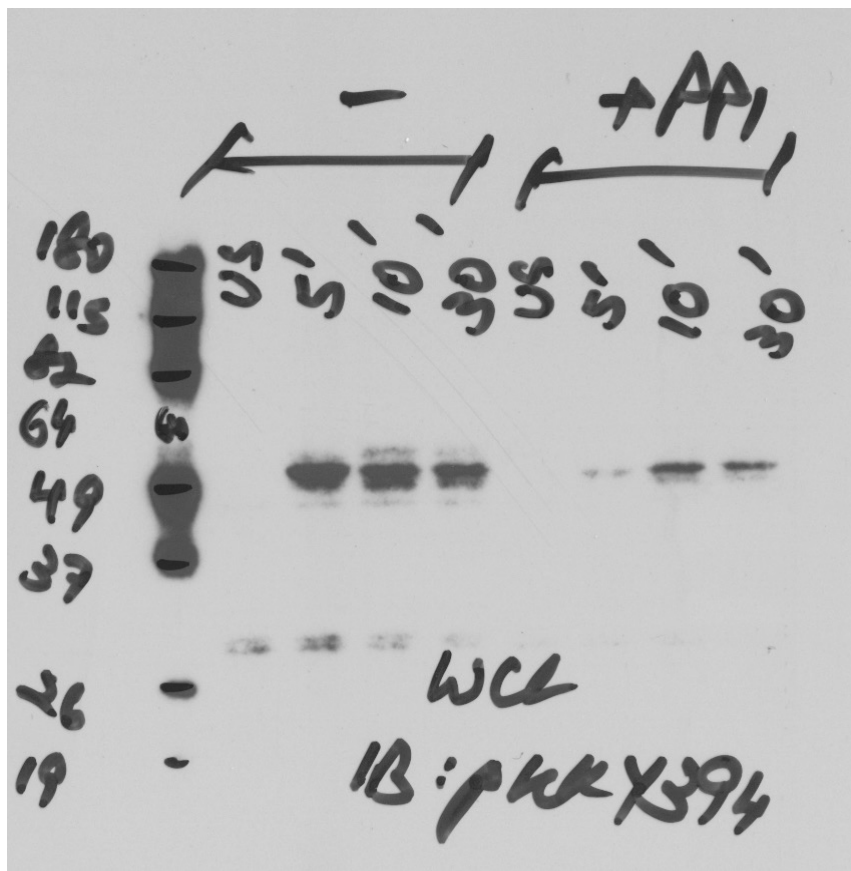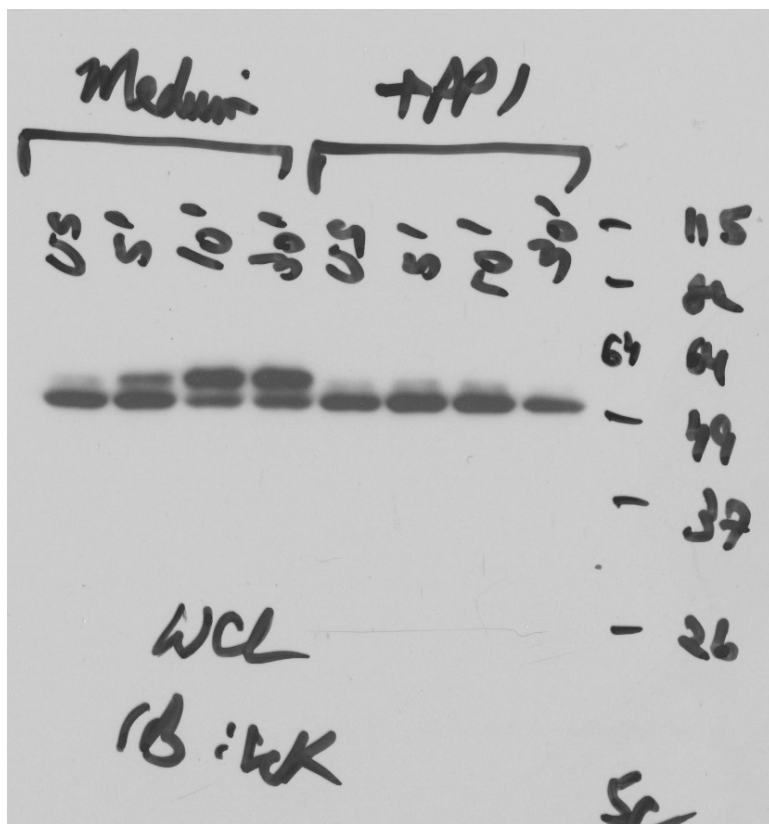

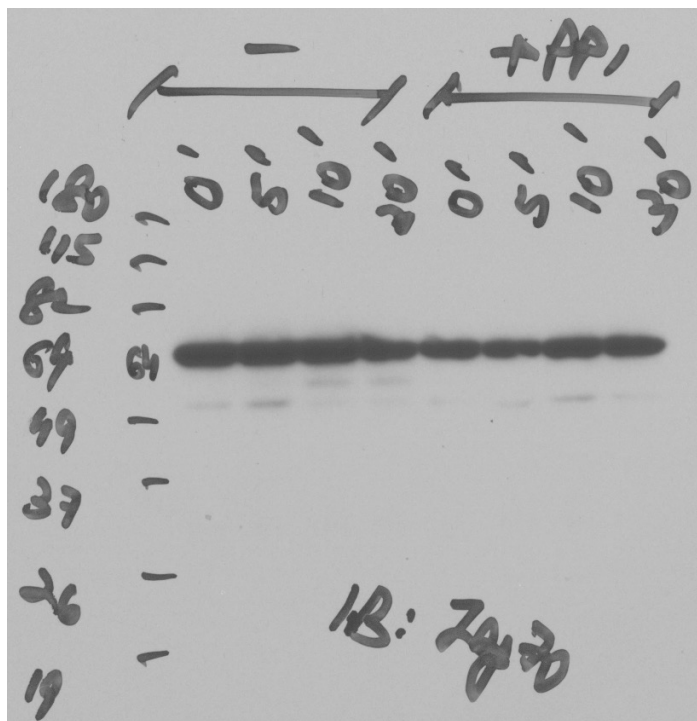

Figure 5d.

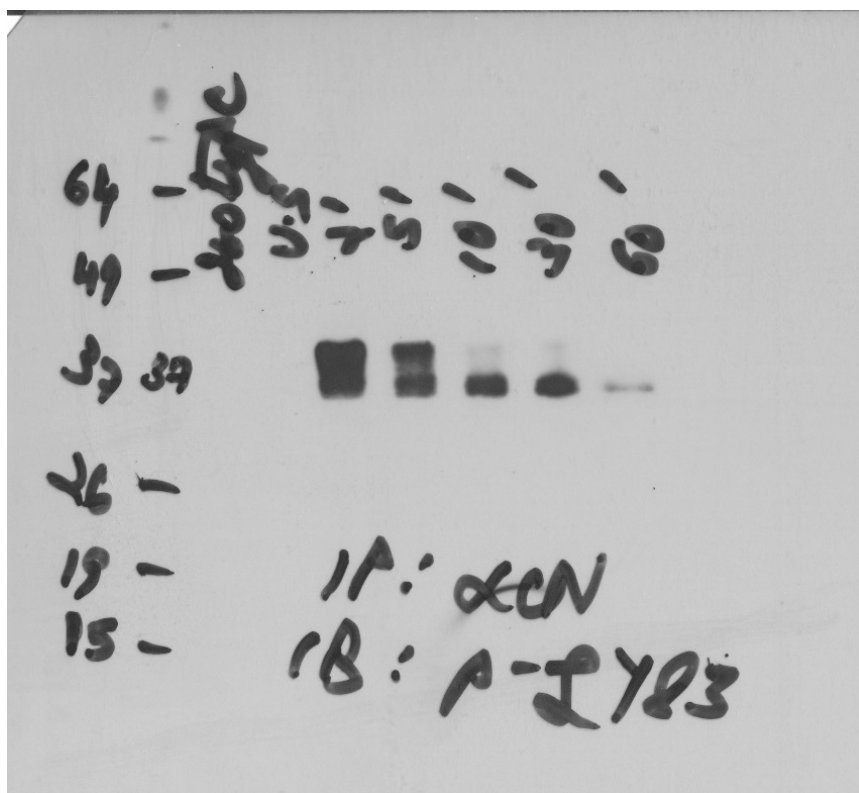

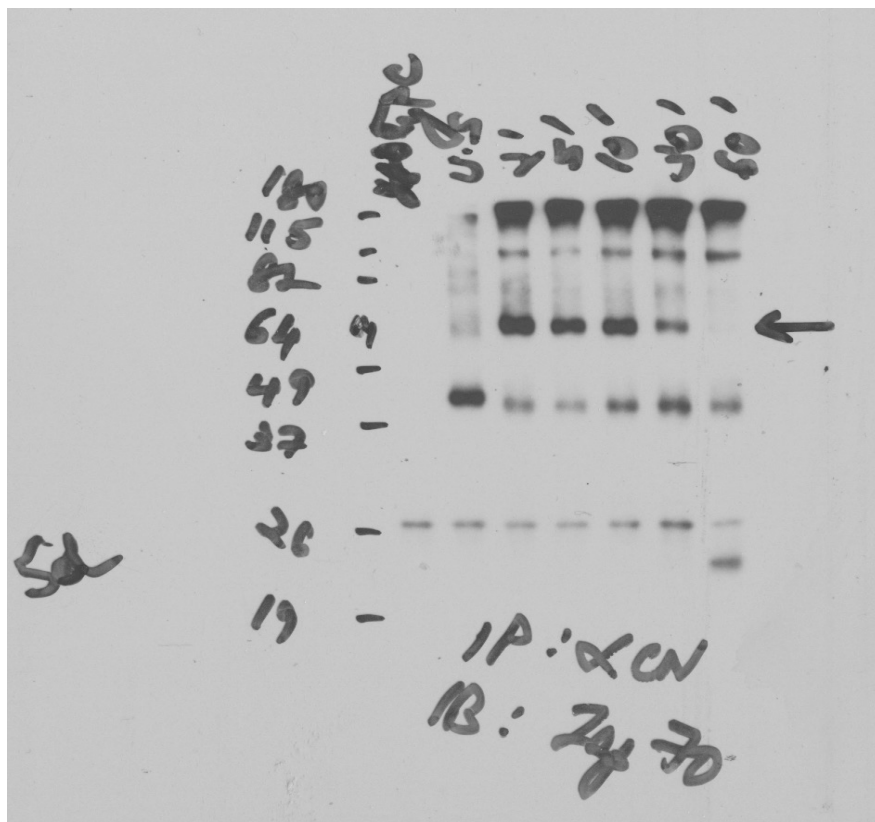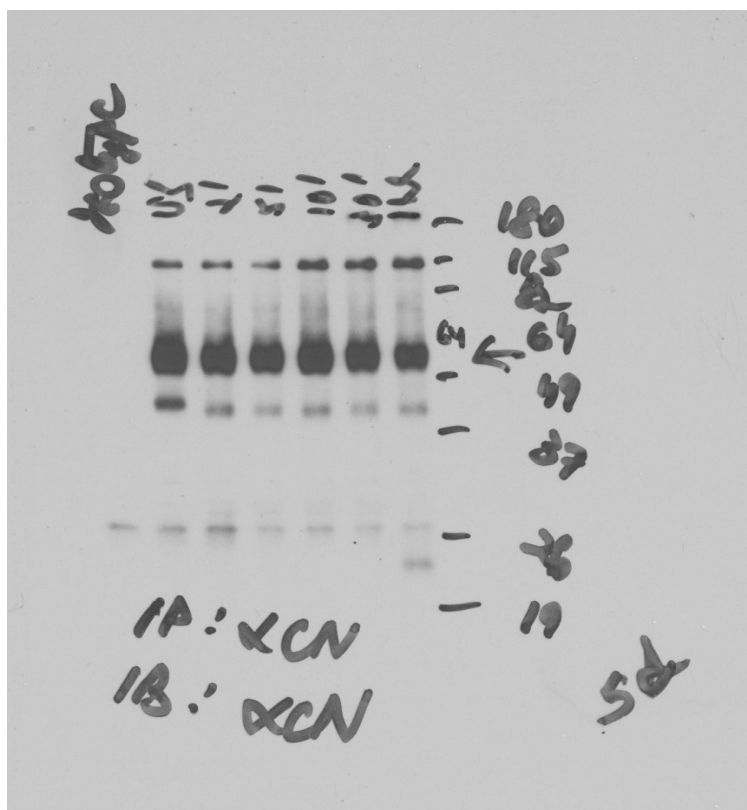

Figure 5e.

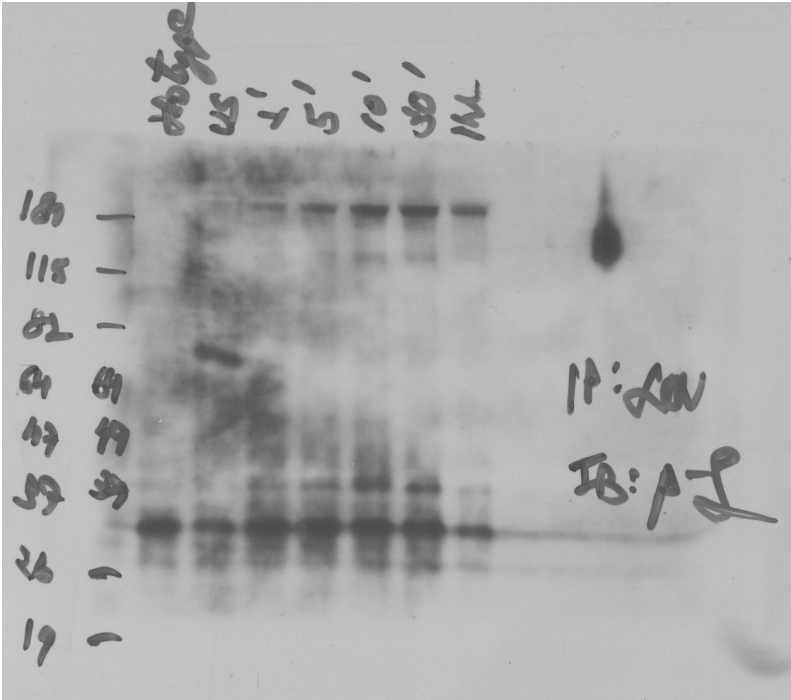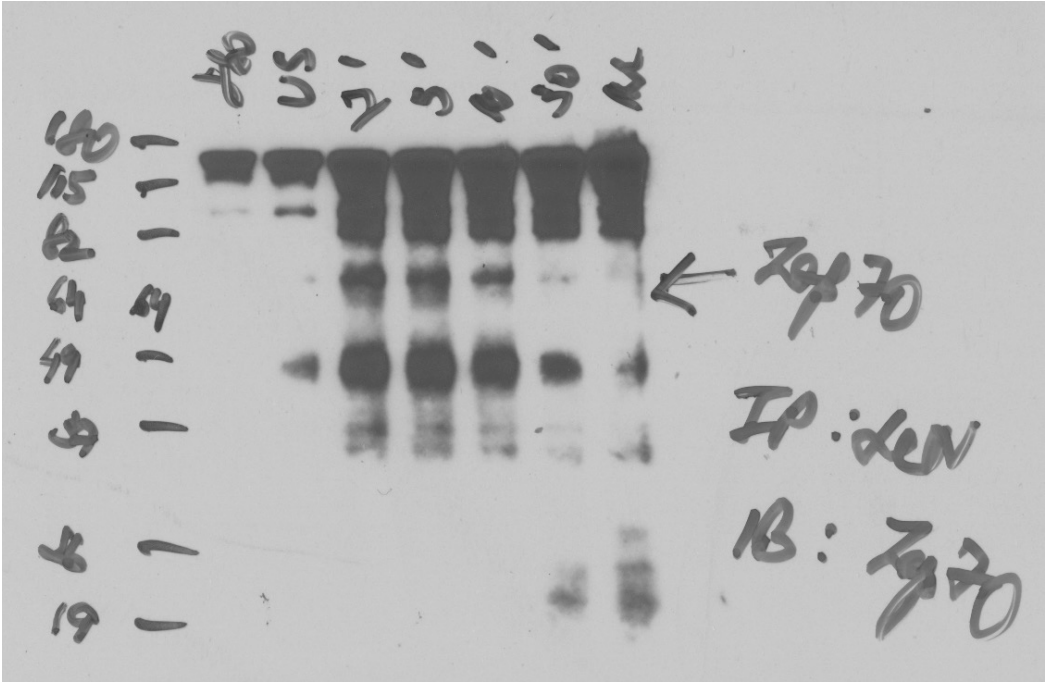



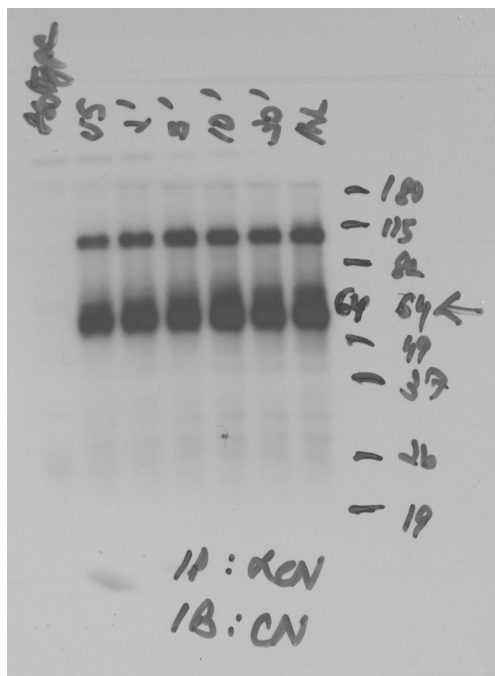

Figure 5f.

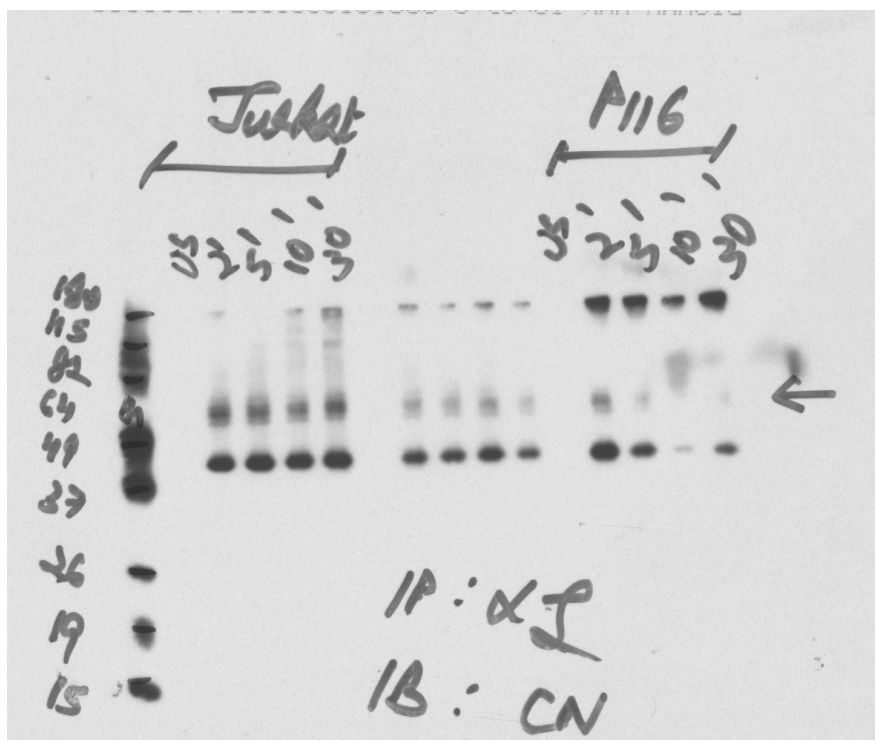

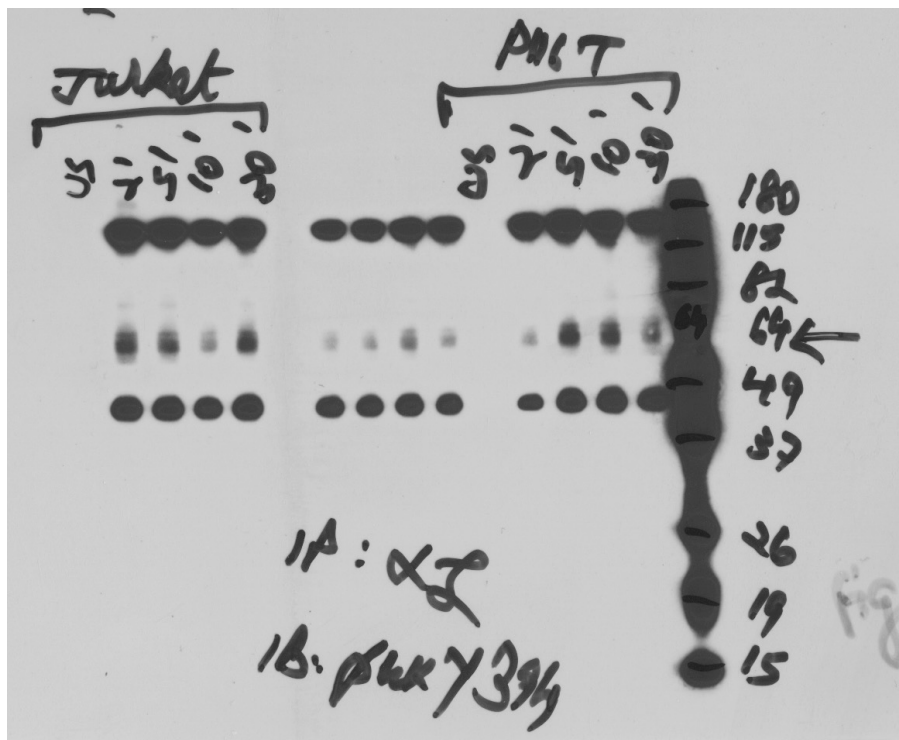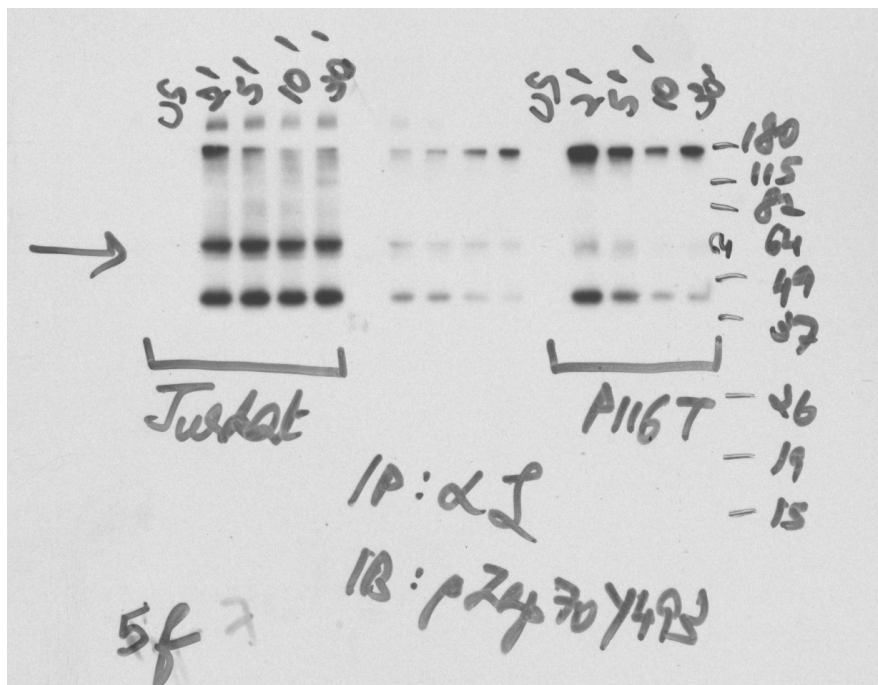

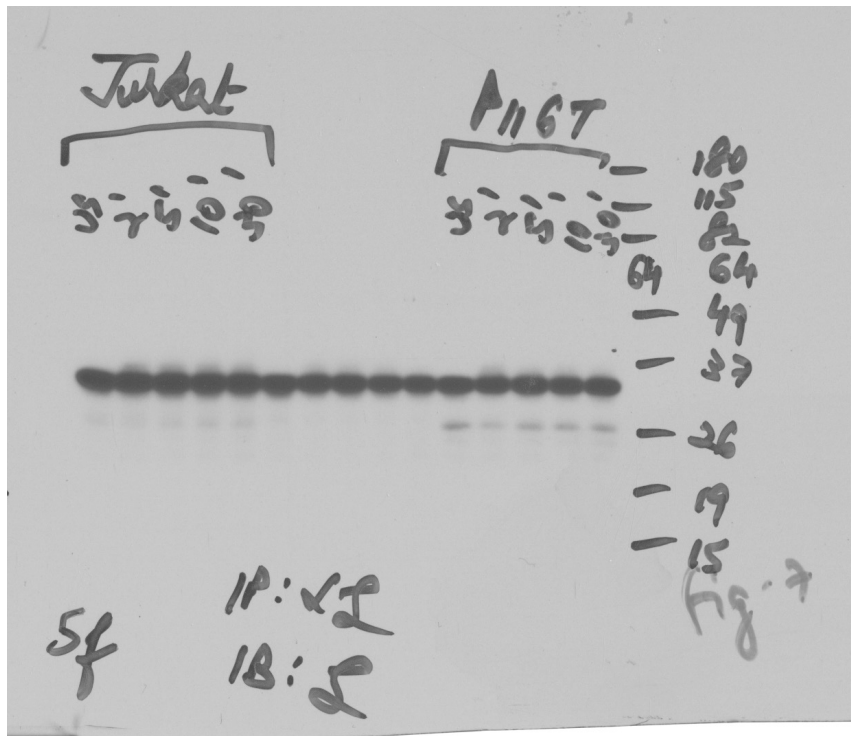

Figure 5g.

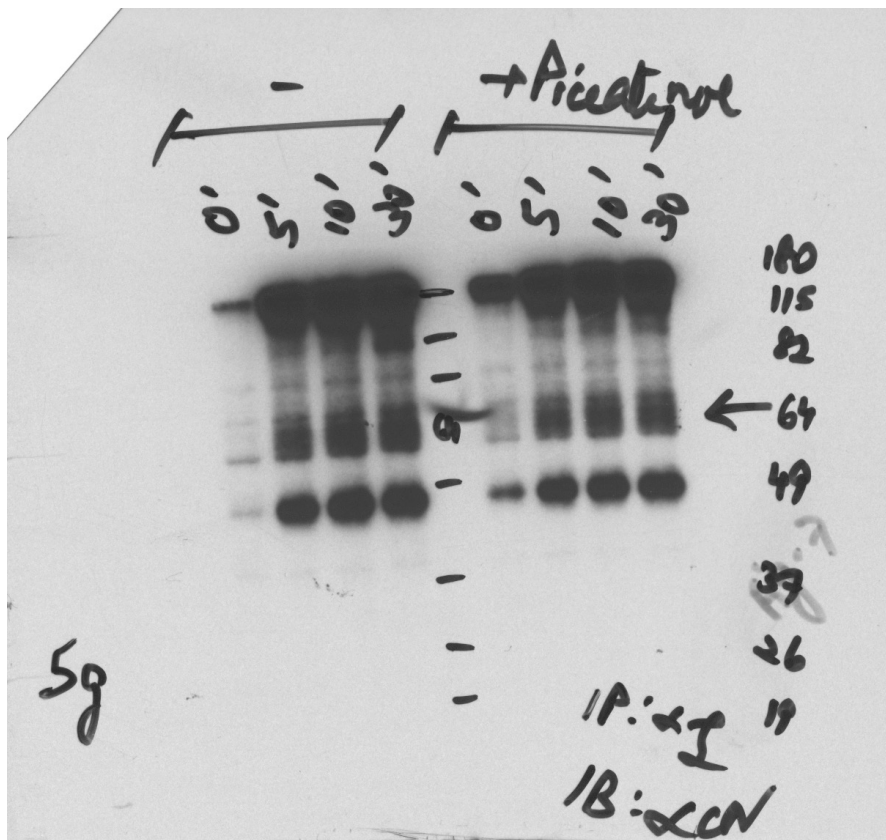

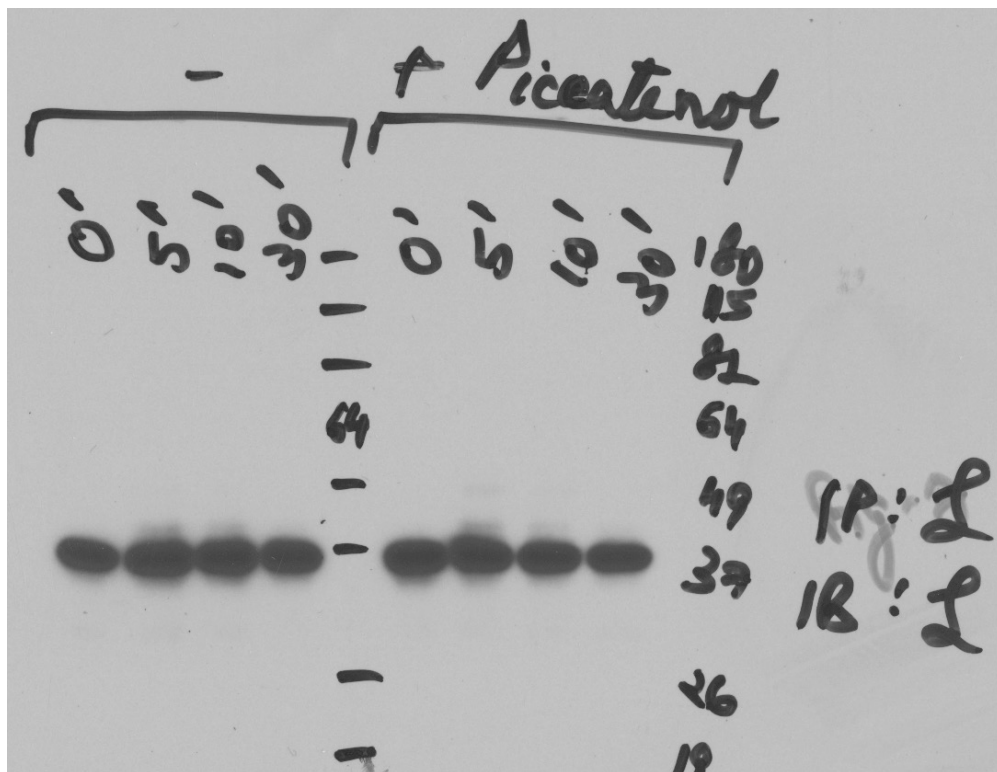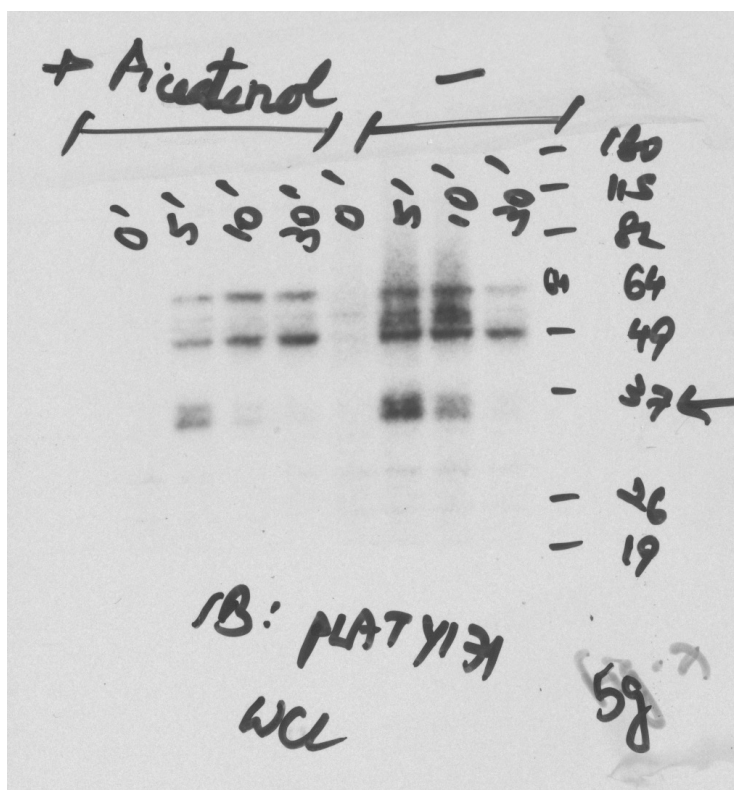

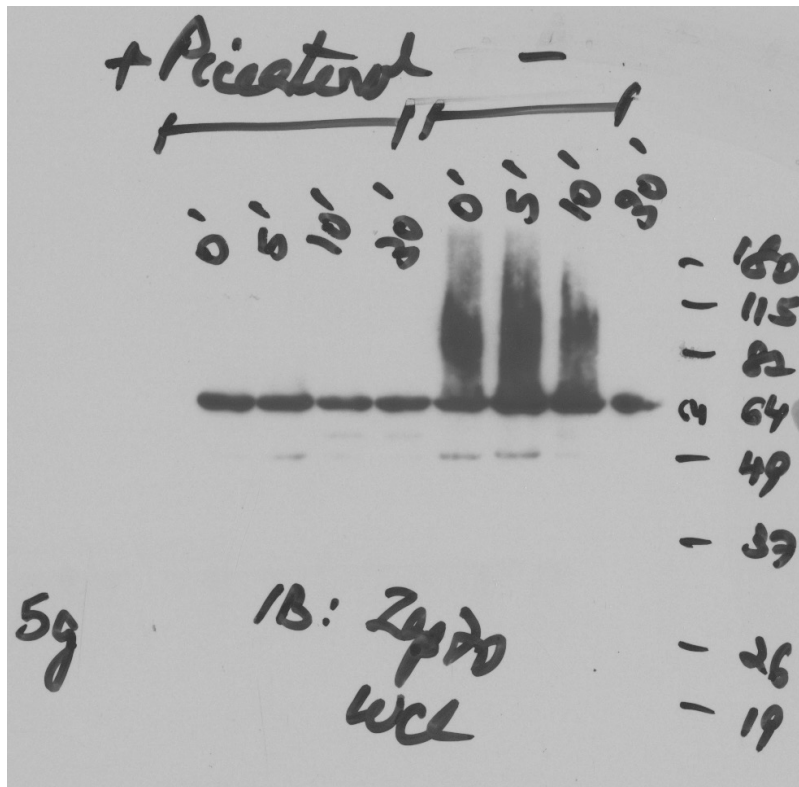

Figure 5h.

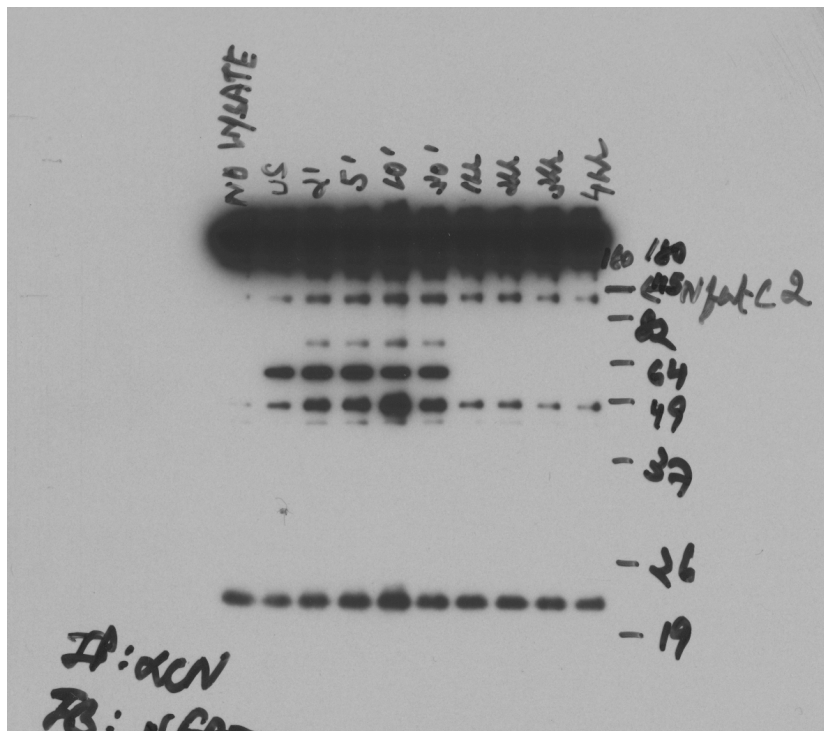

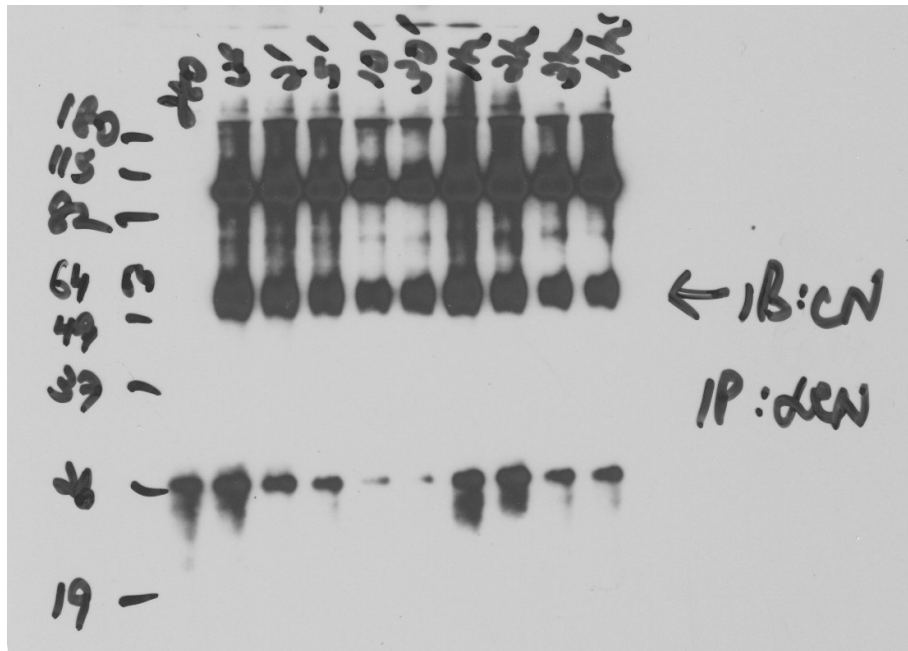

Figure 5i.

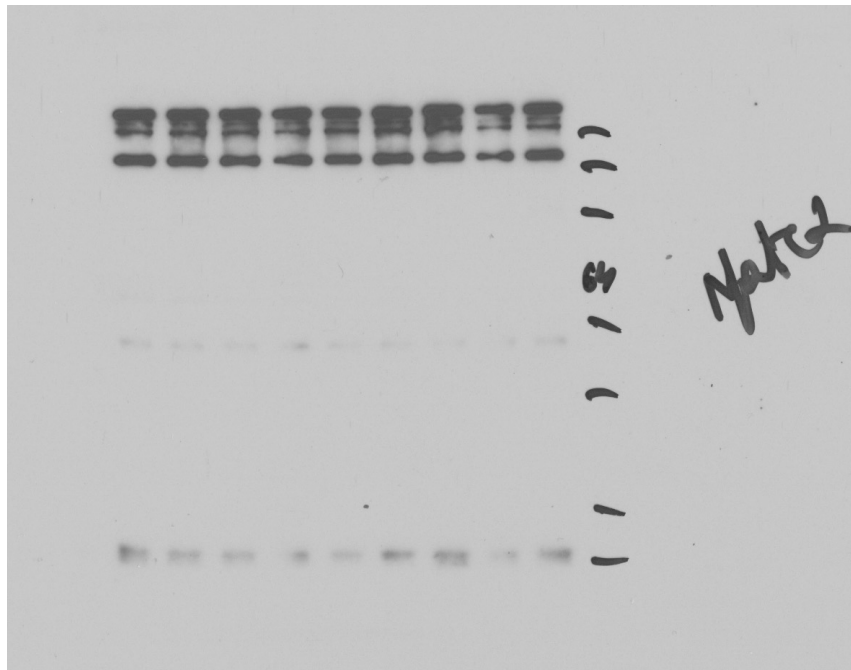

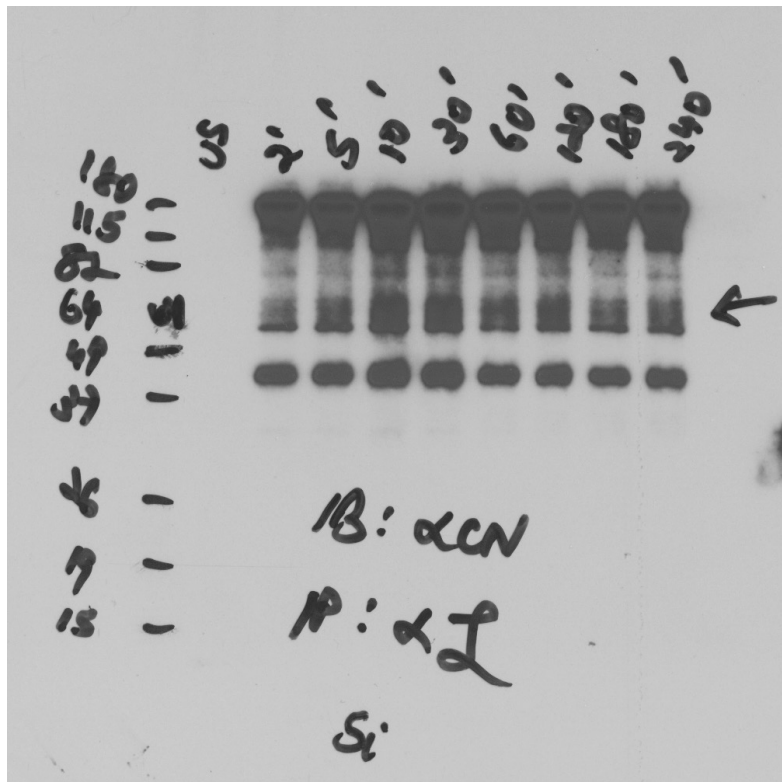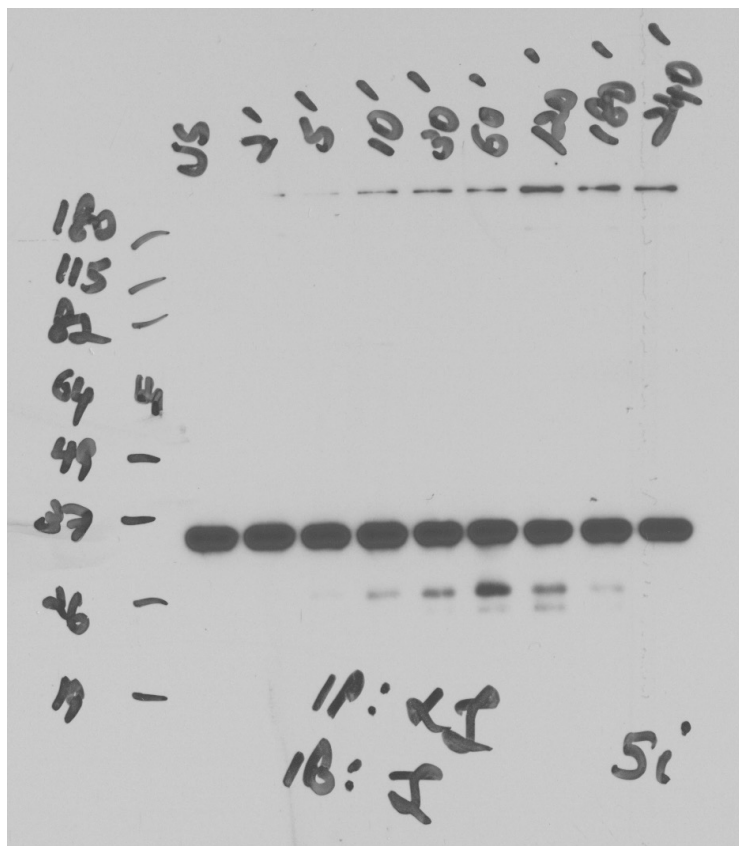

Figure 6a.

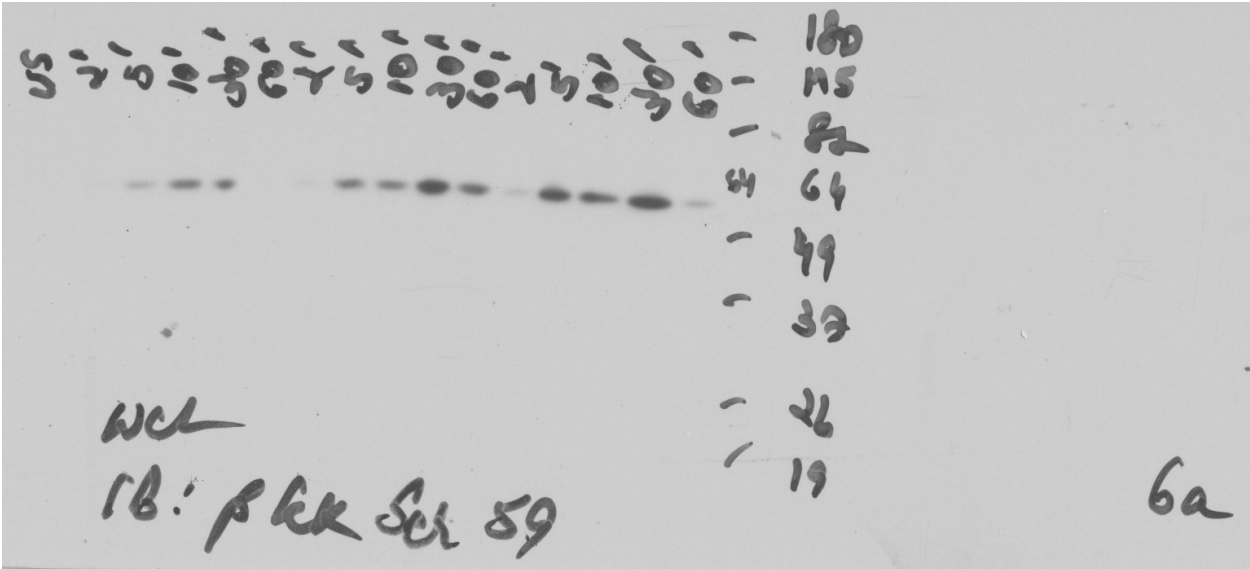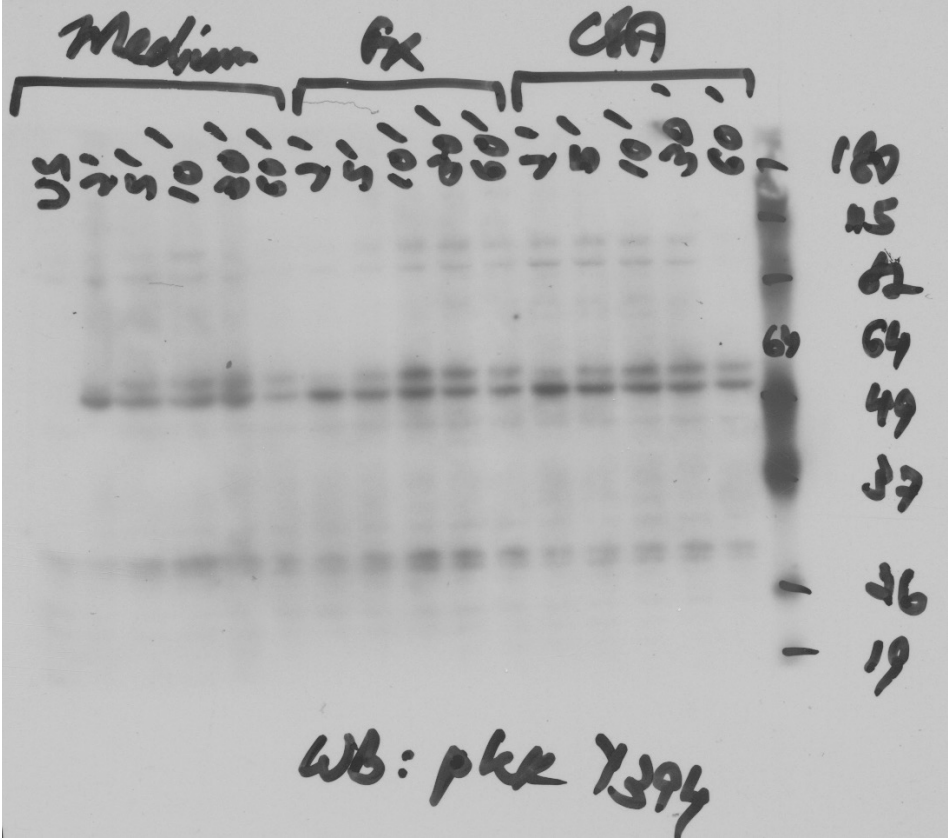



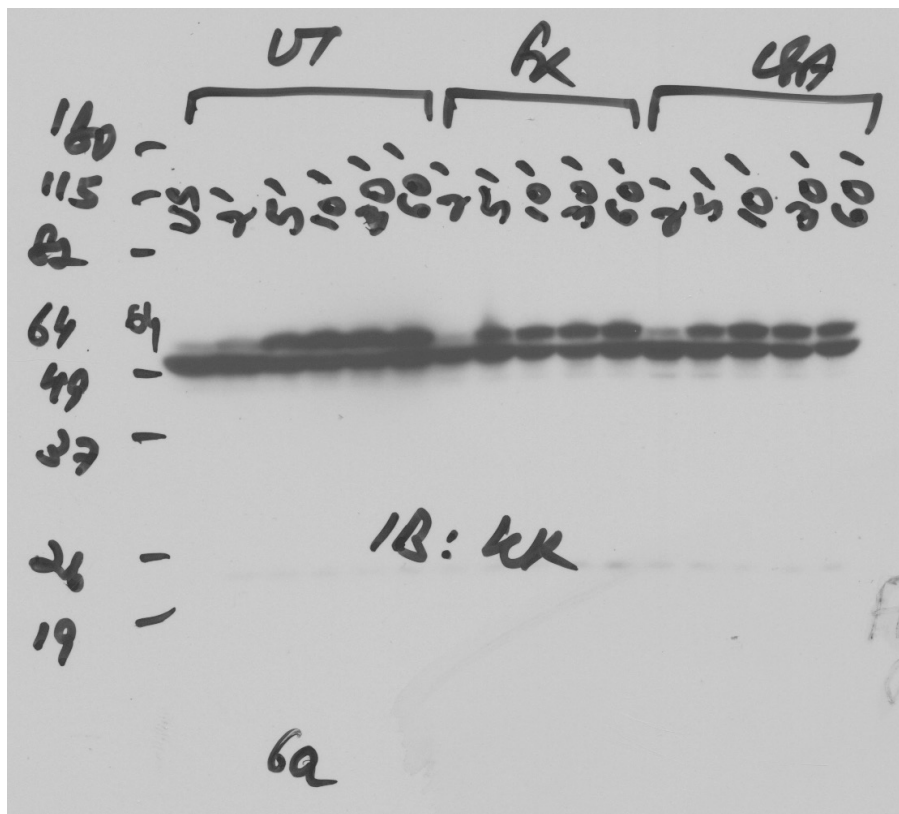

Figure 6b.

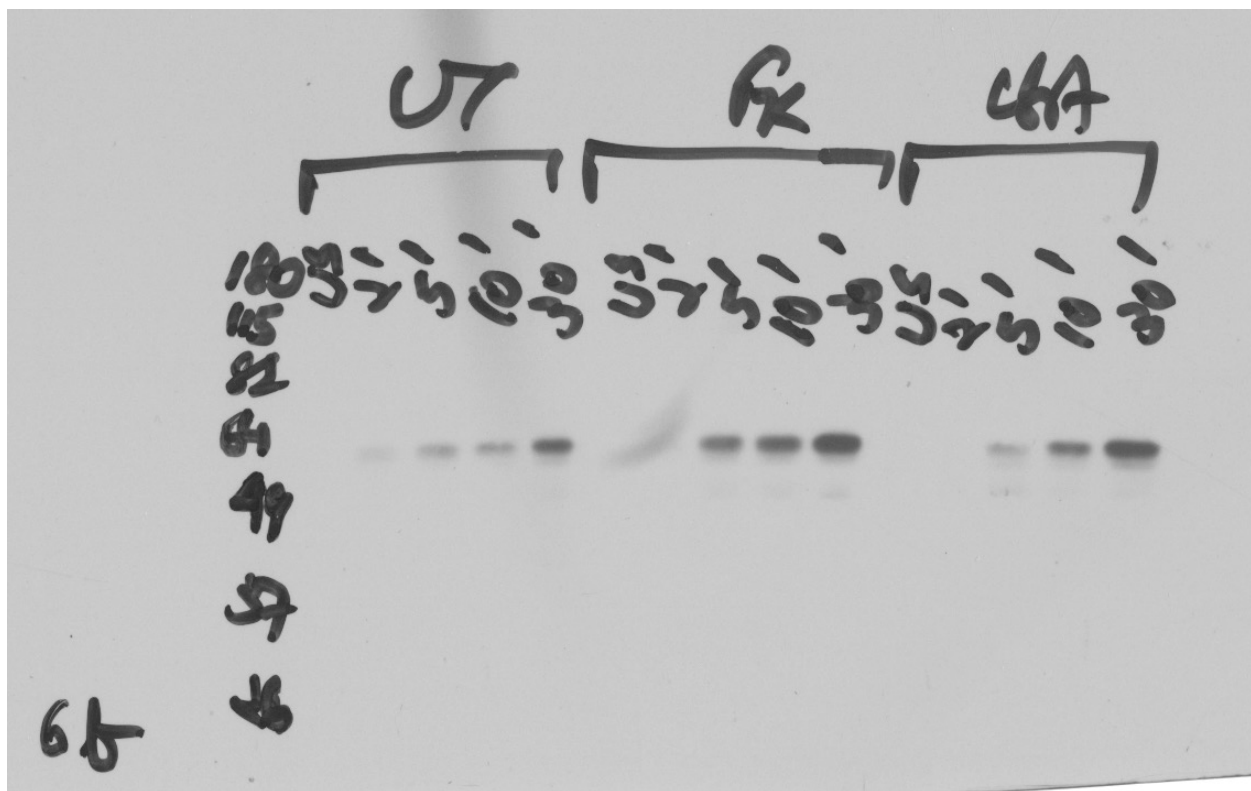

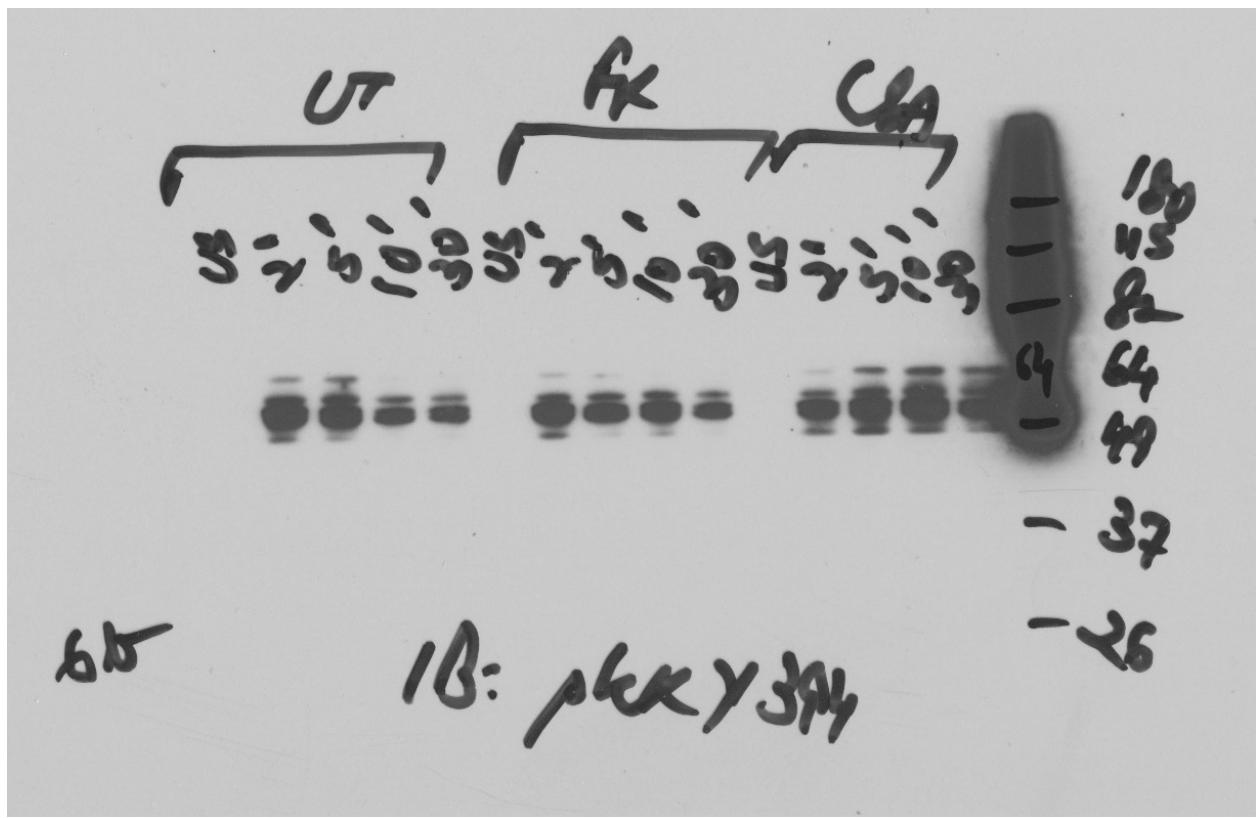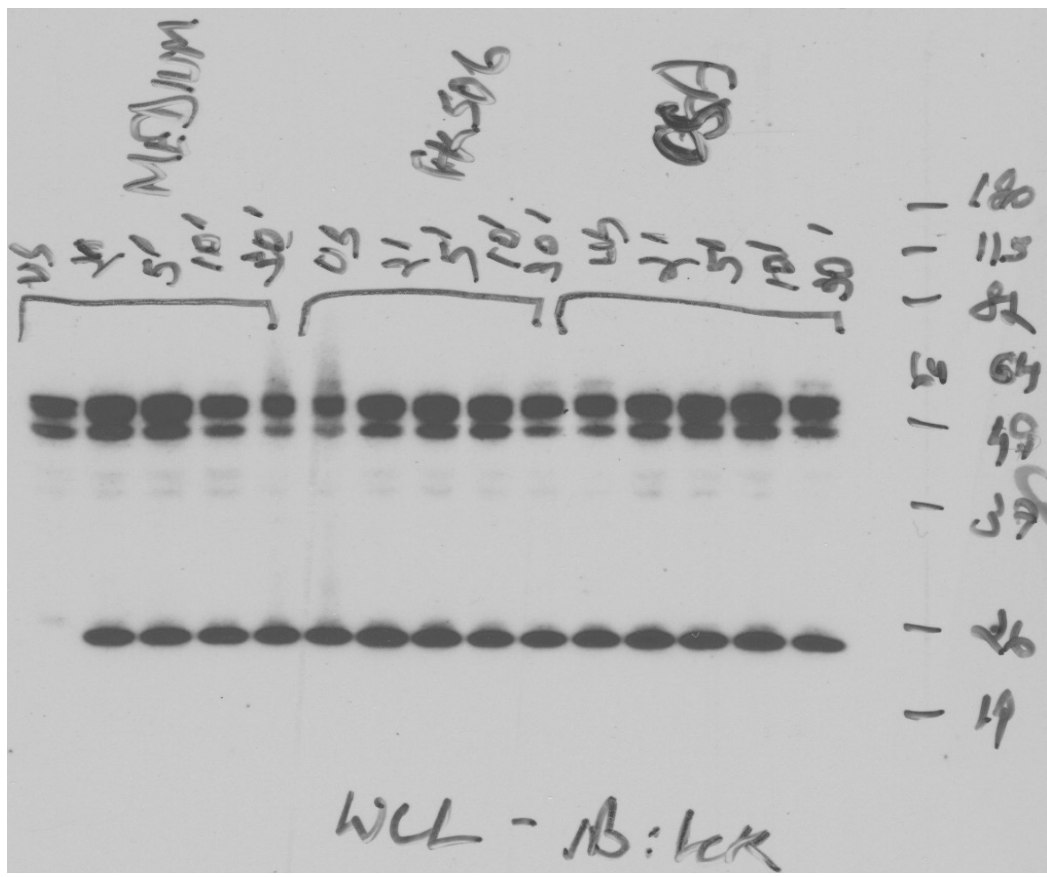

Figure 6c.

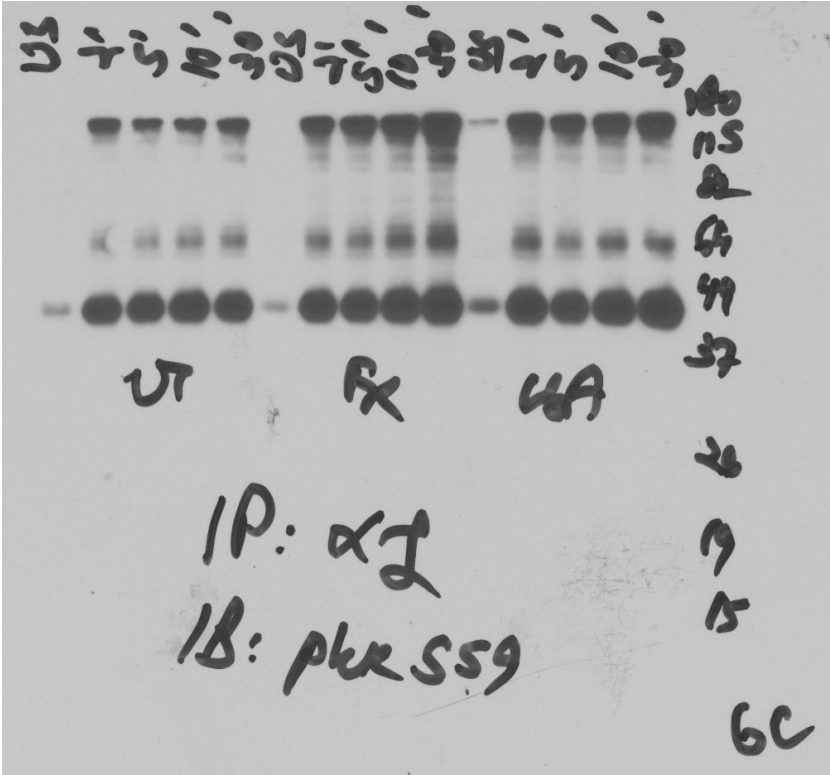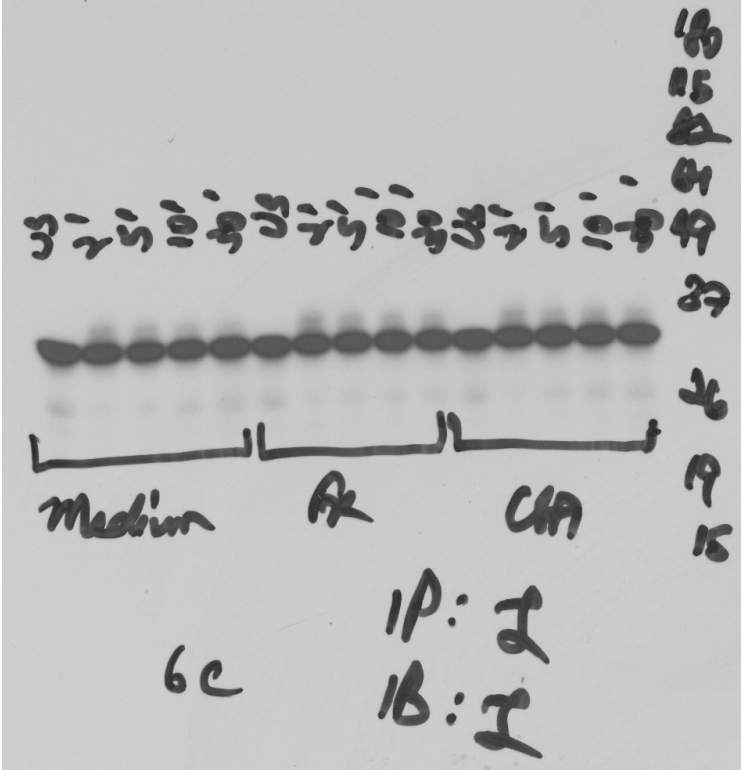

Figure 6d.

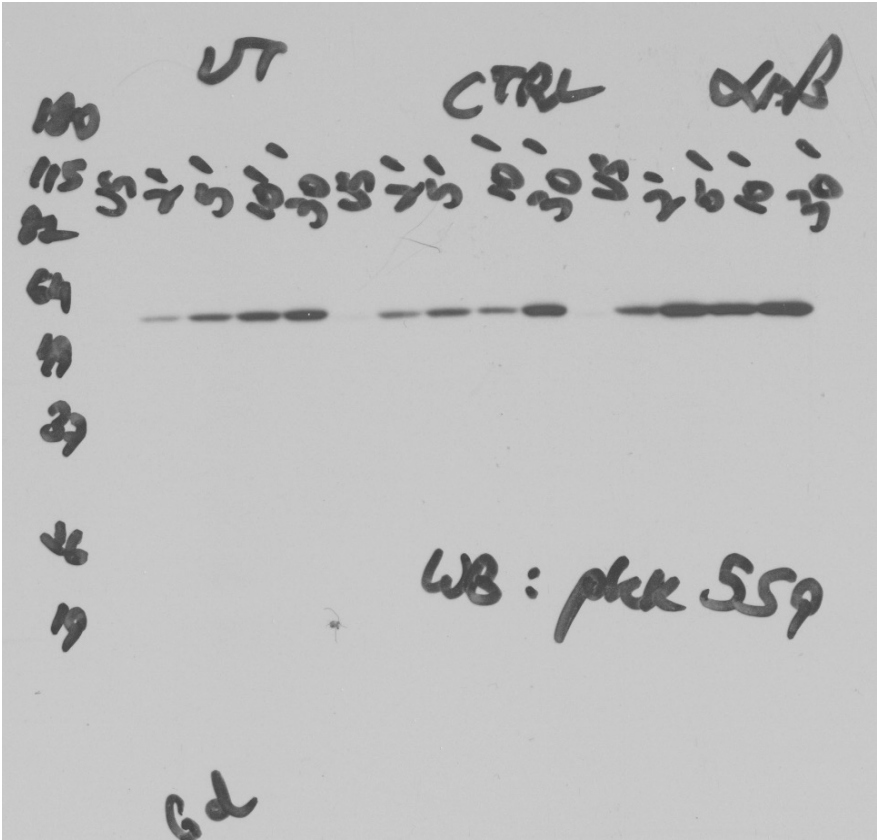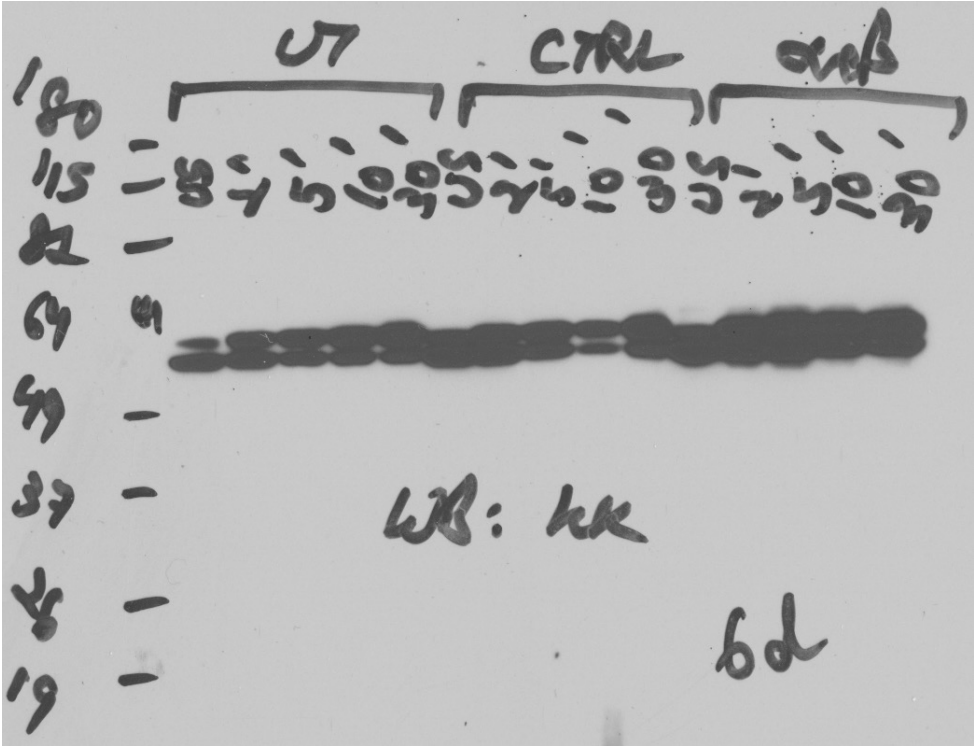

Figure 6e.

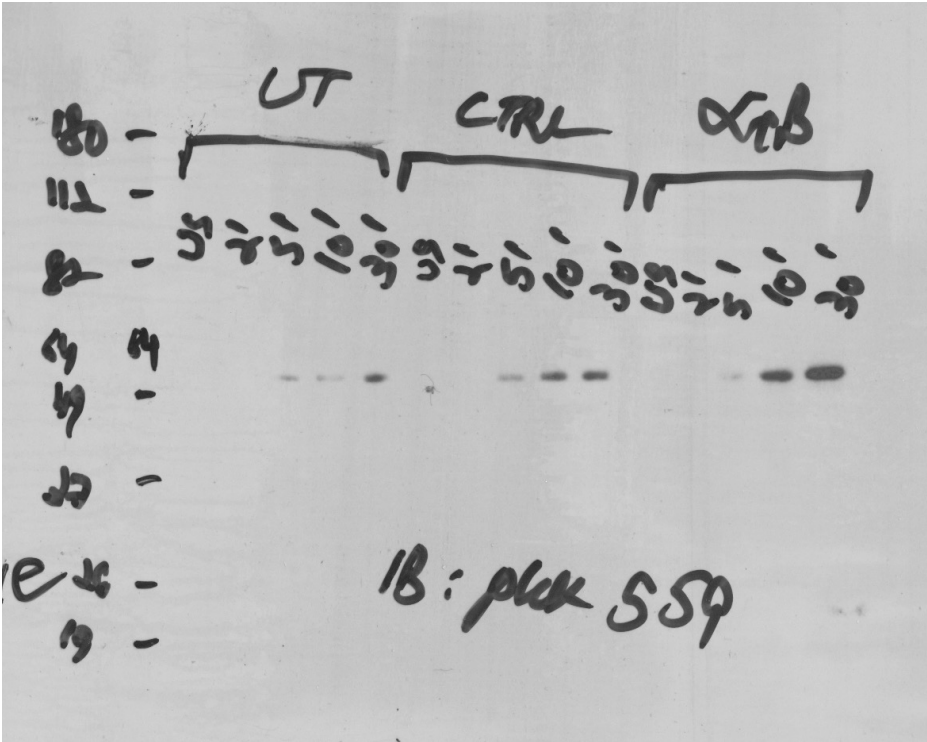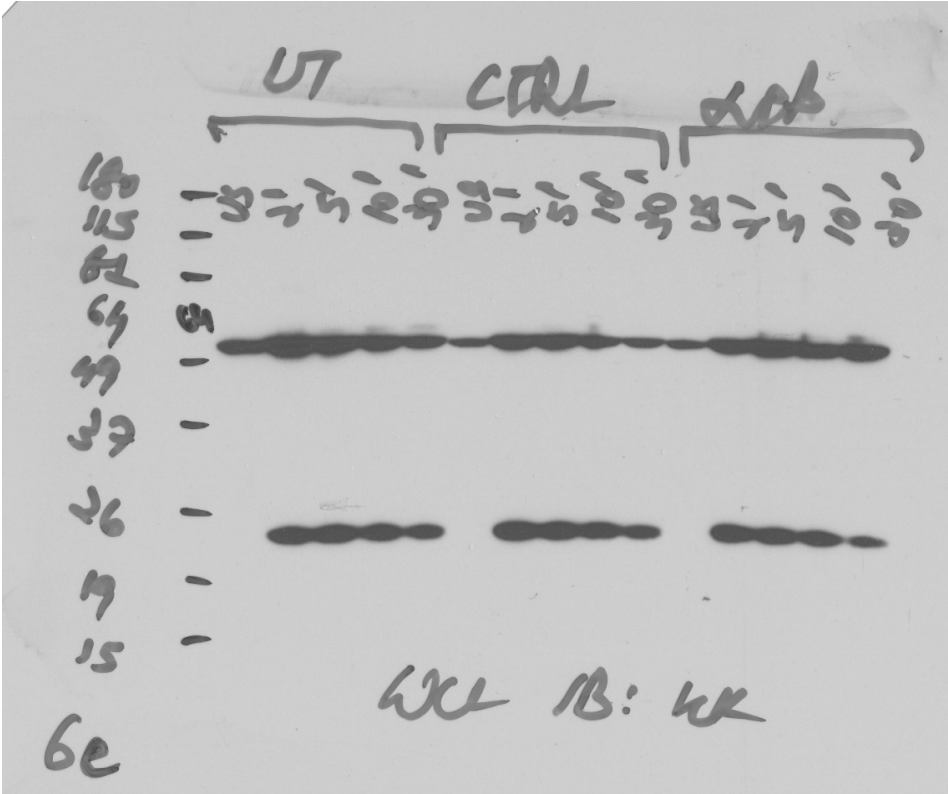

Figure 6f.

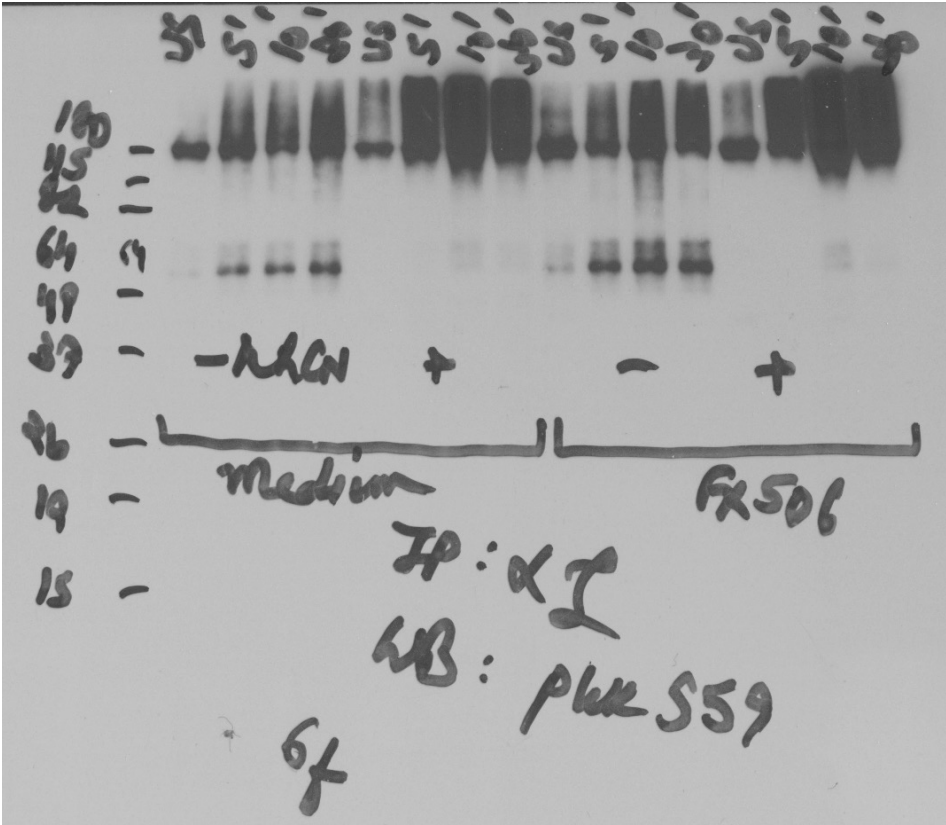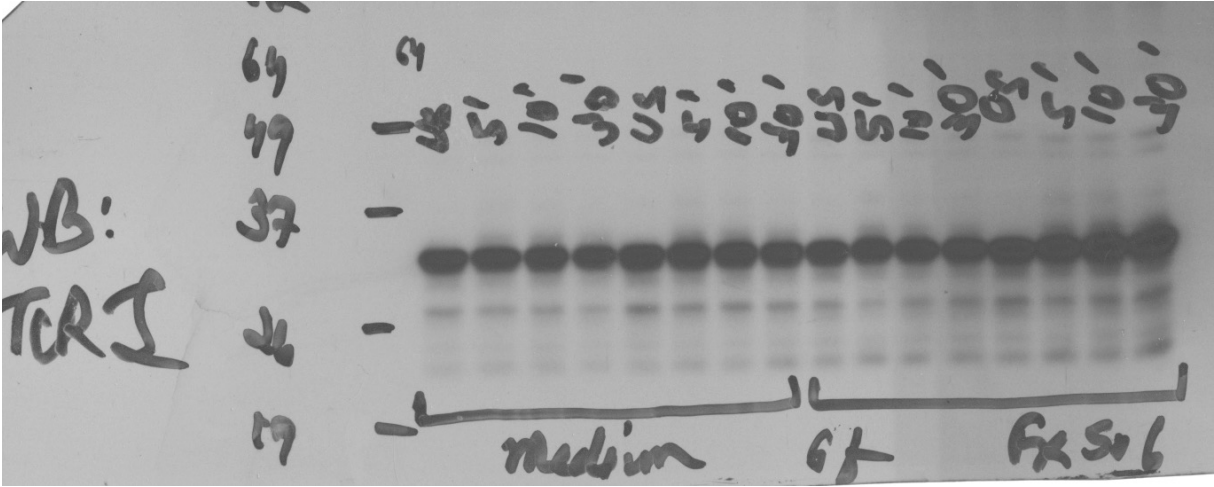

Figure 7a.

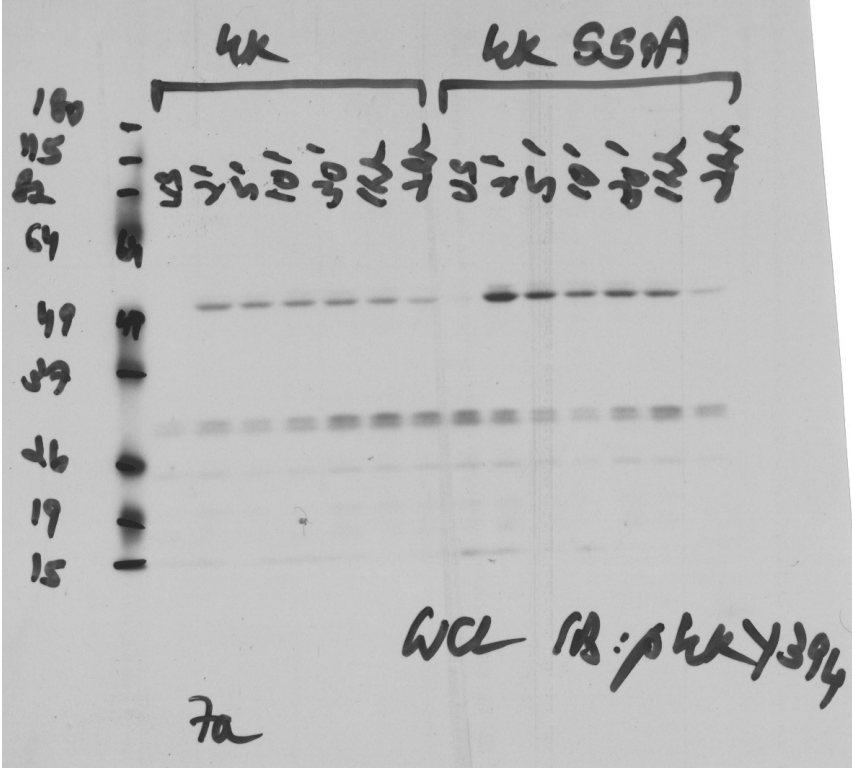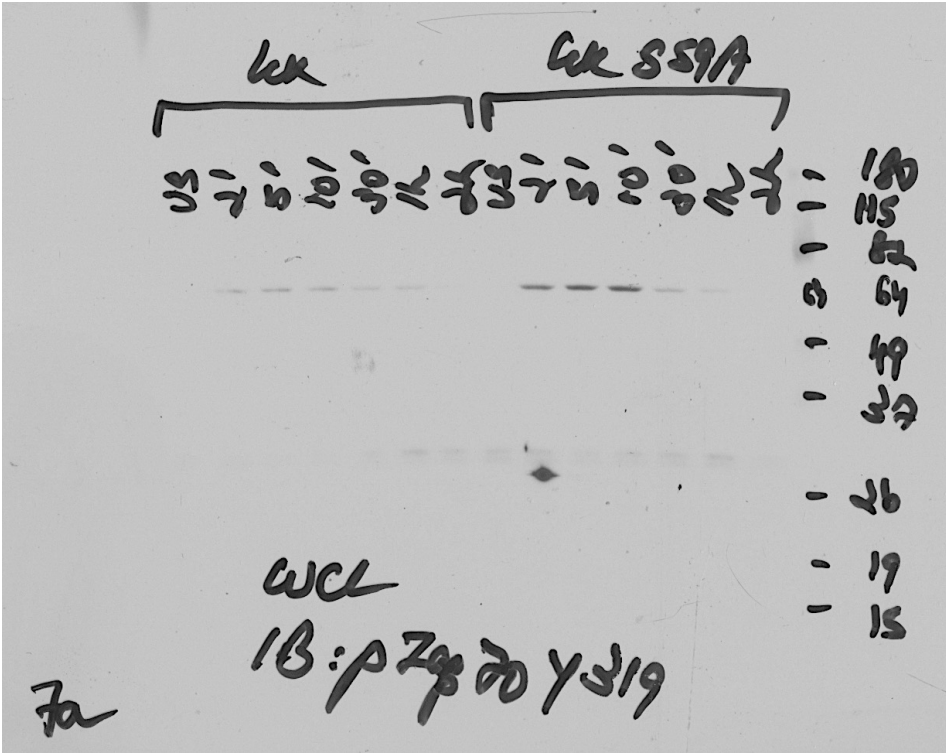

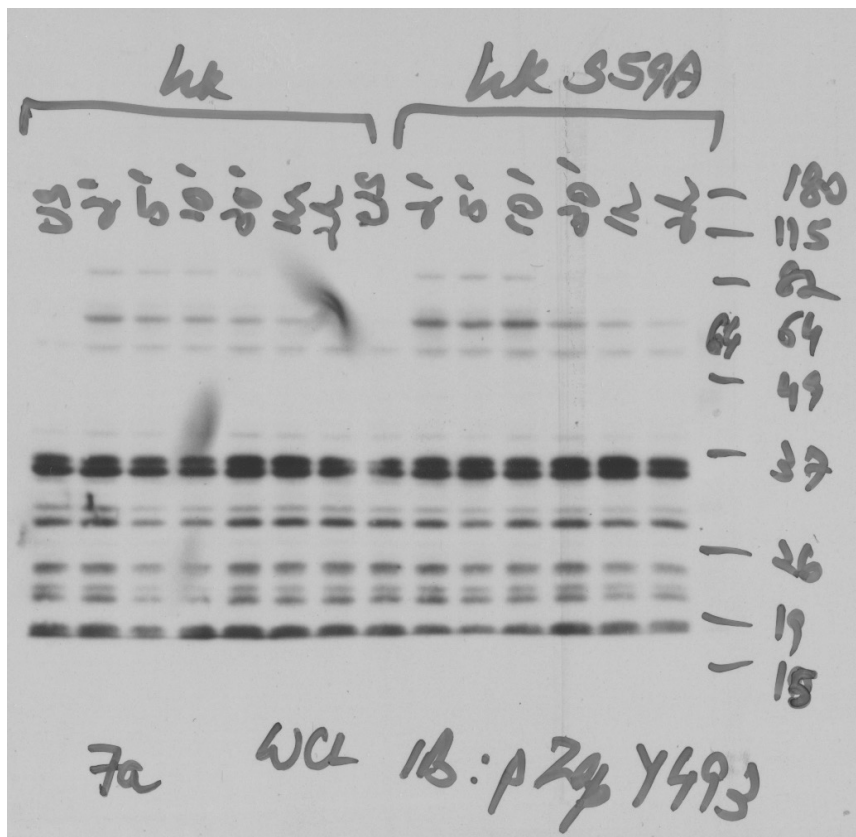



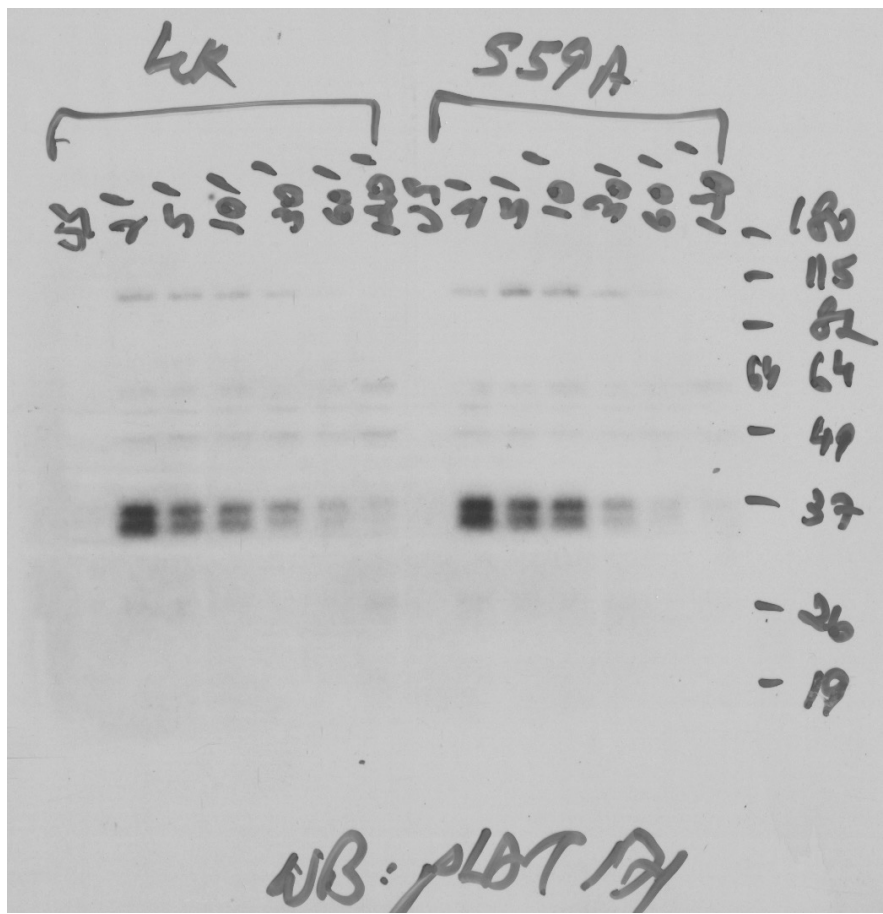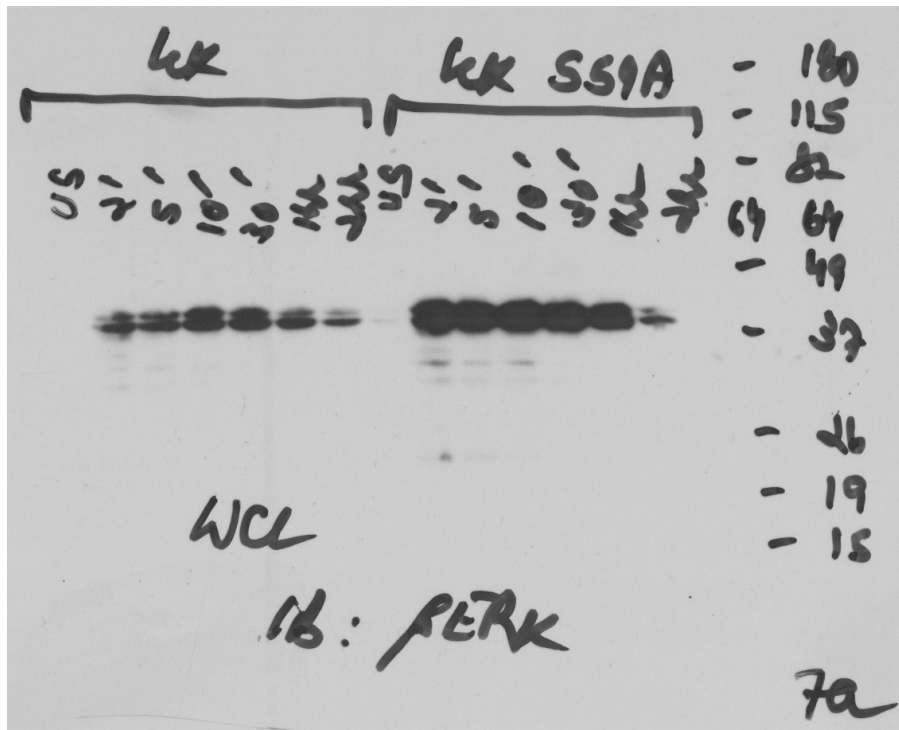

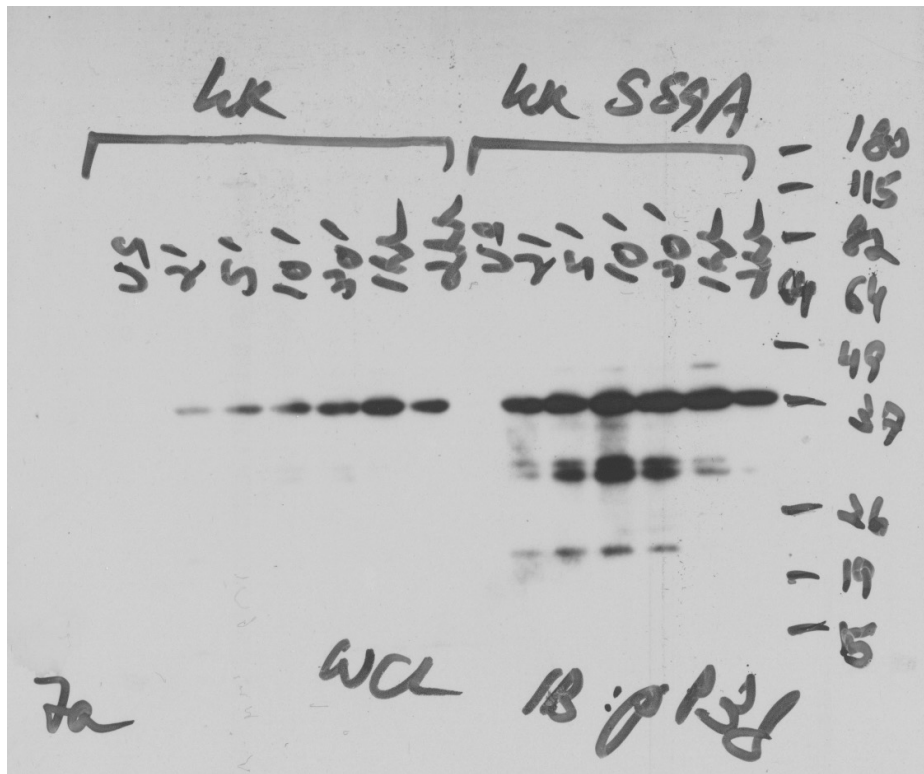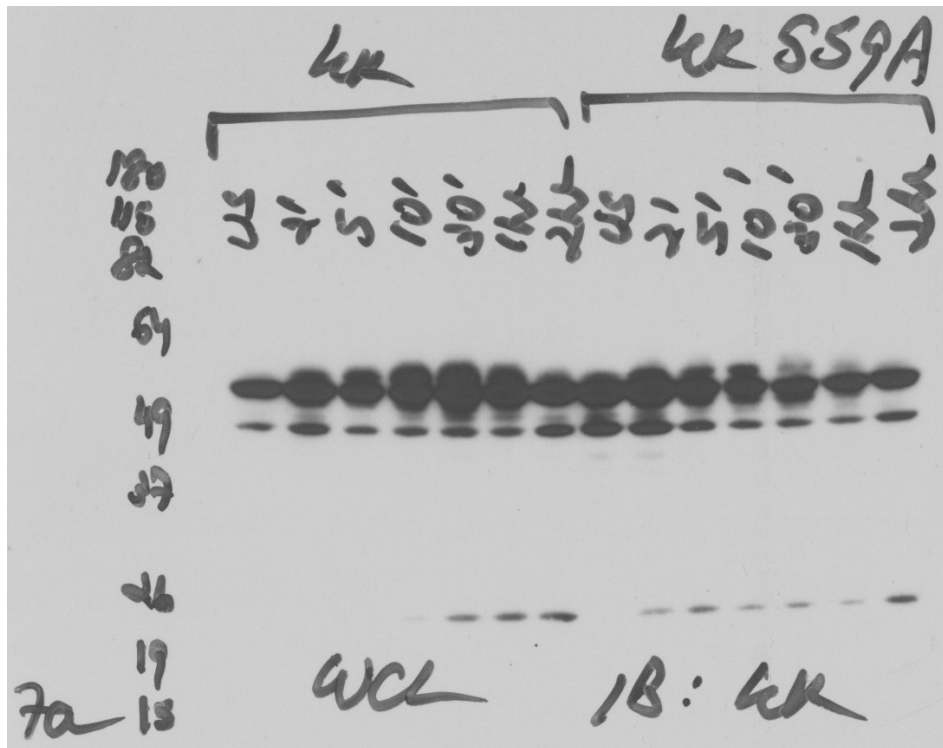

Figure 7b.

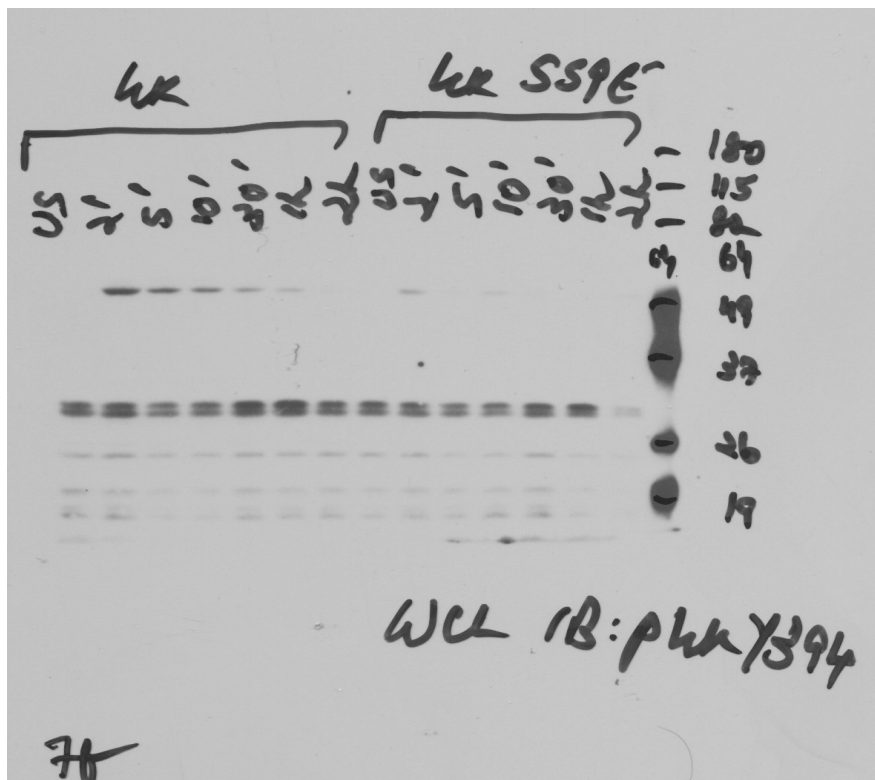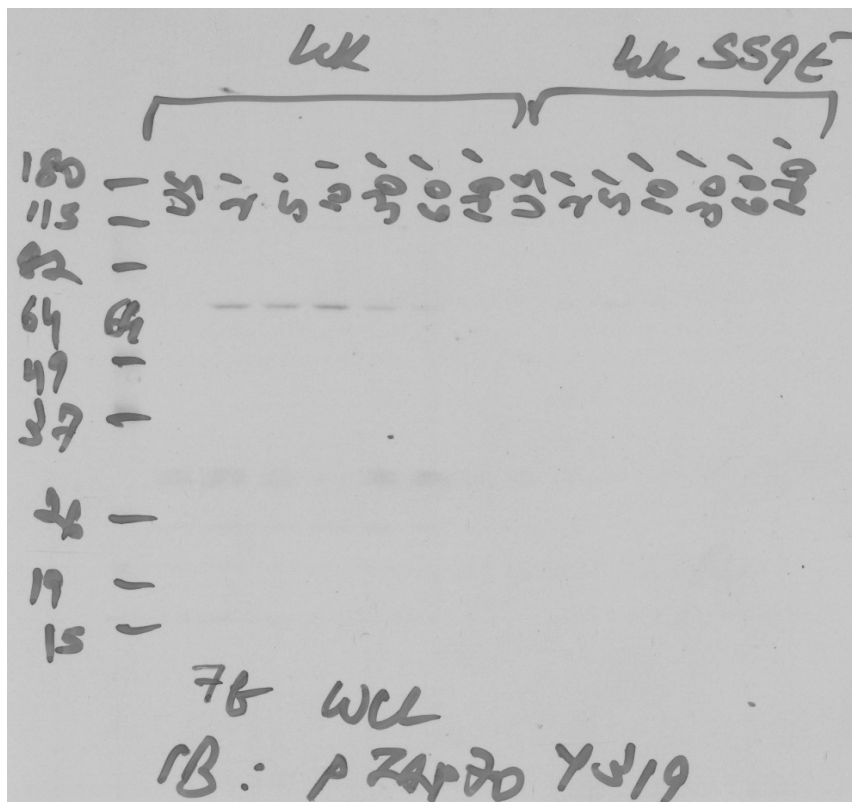

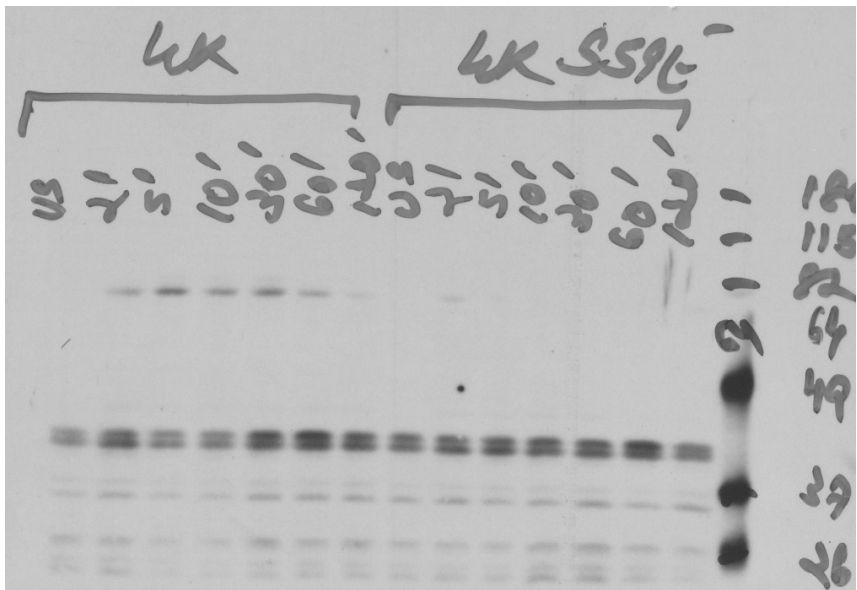

WCL

IB: p24p70Y49J

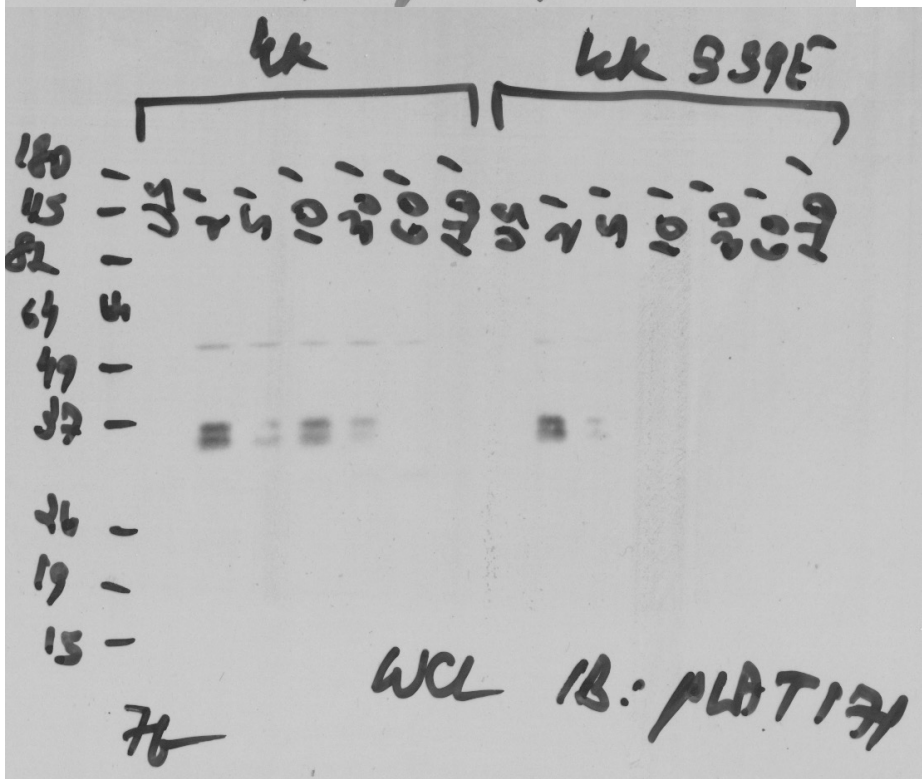

WCL IB: PLAT17H

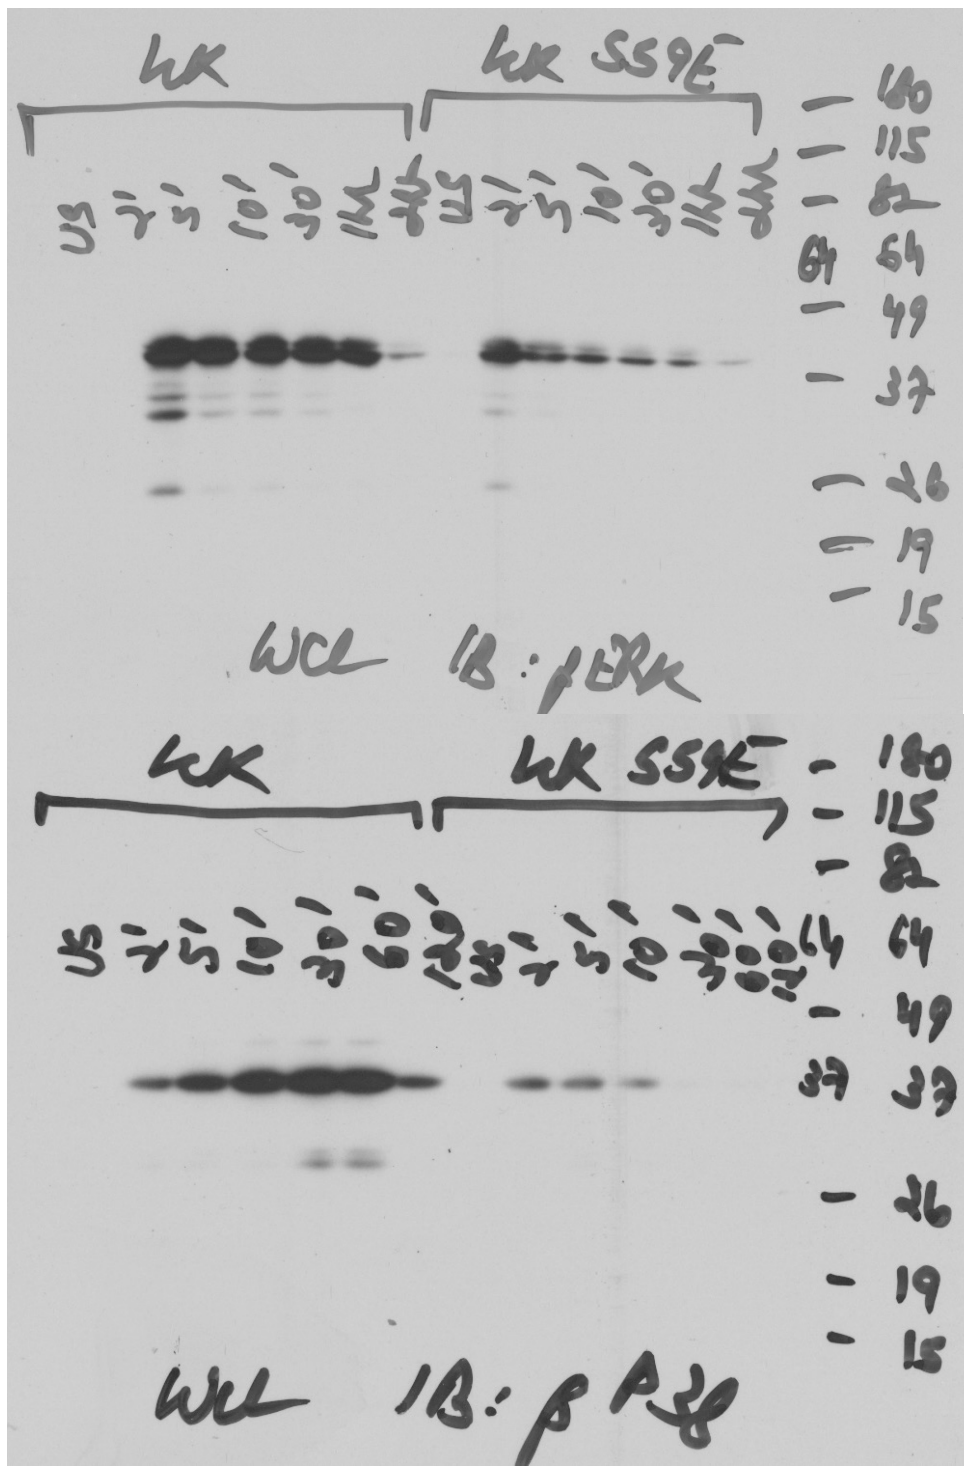

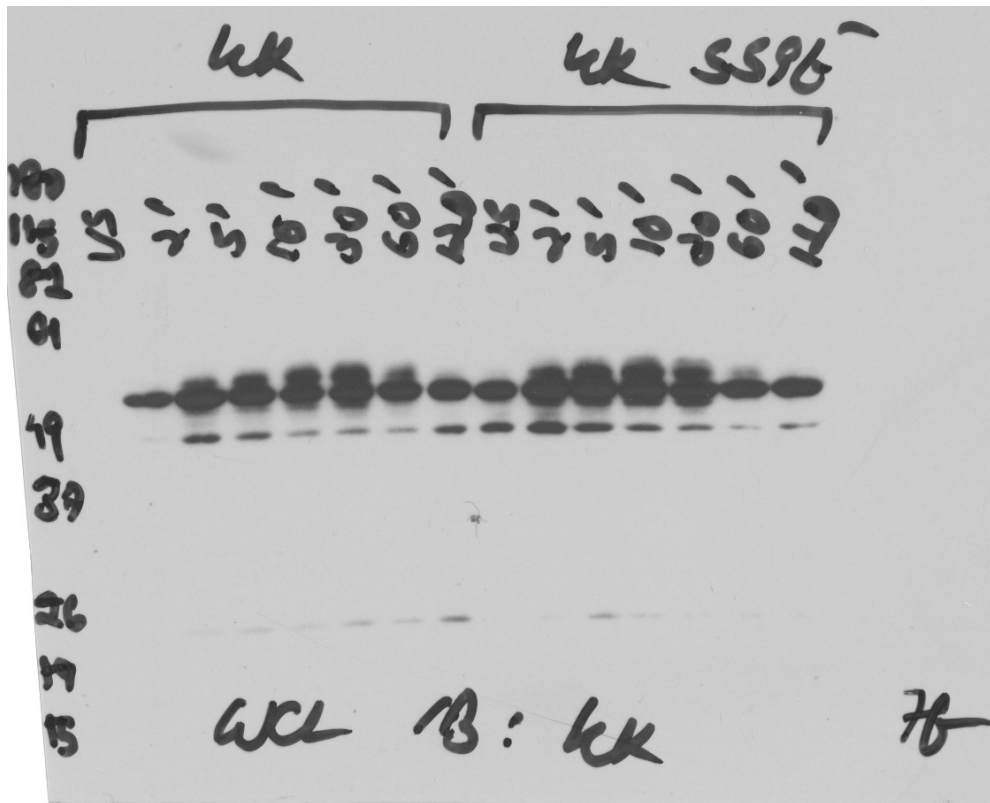

Figure 8c.

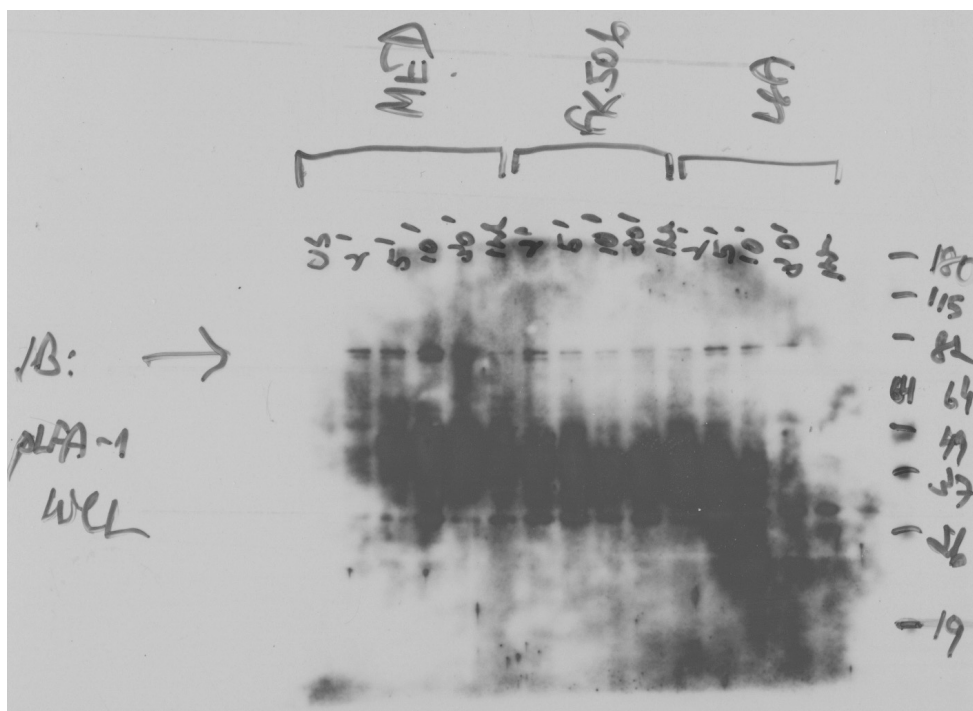

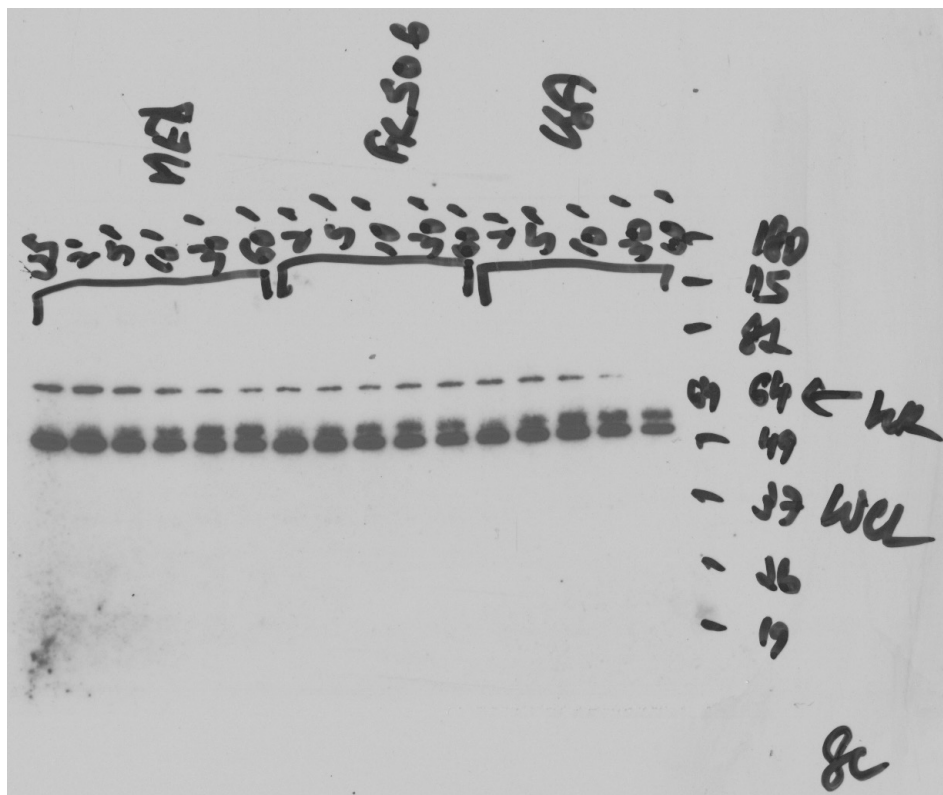

Supplementary Figure 1a.

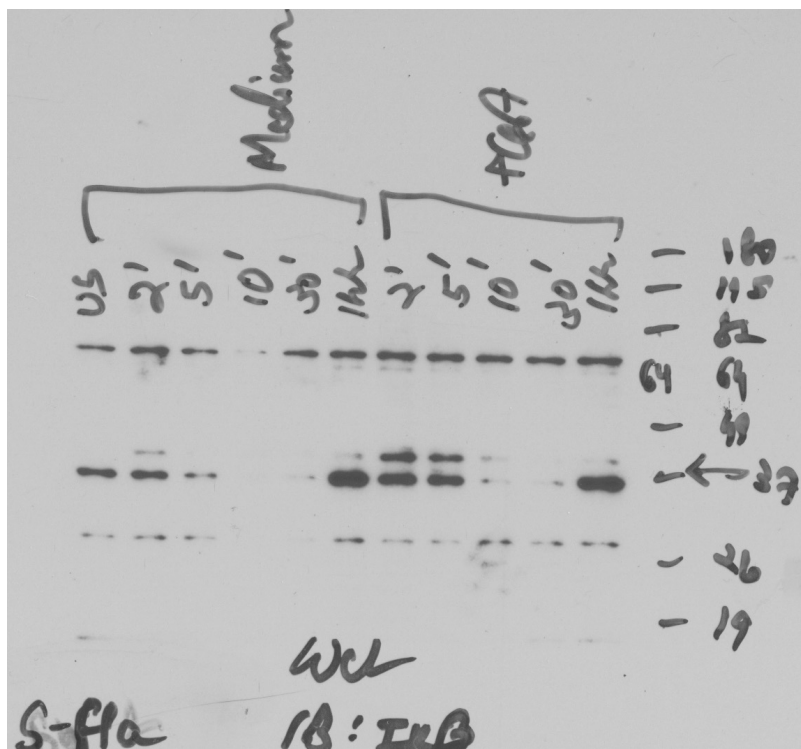



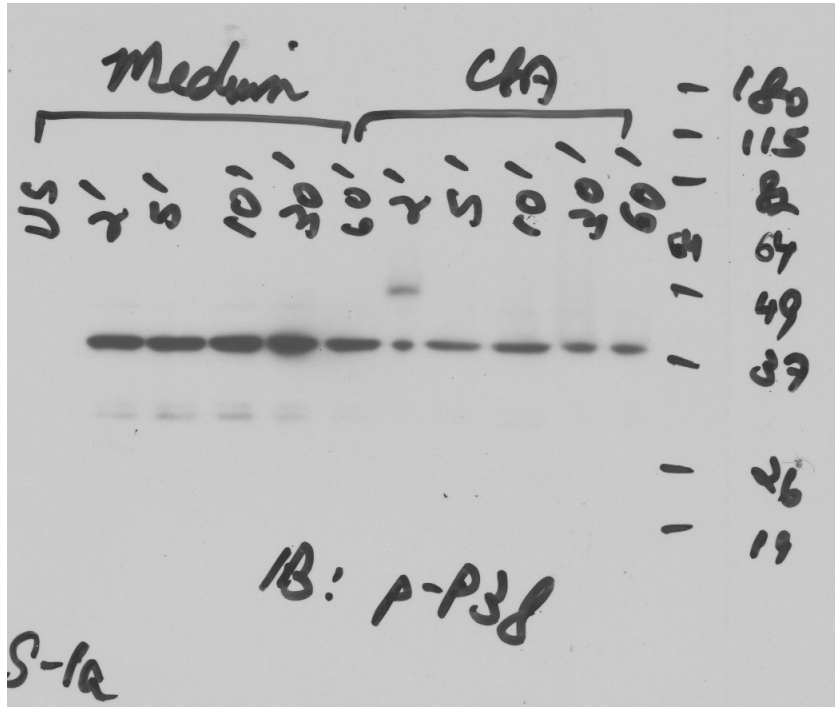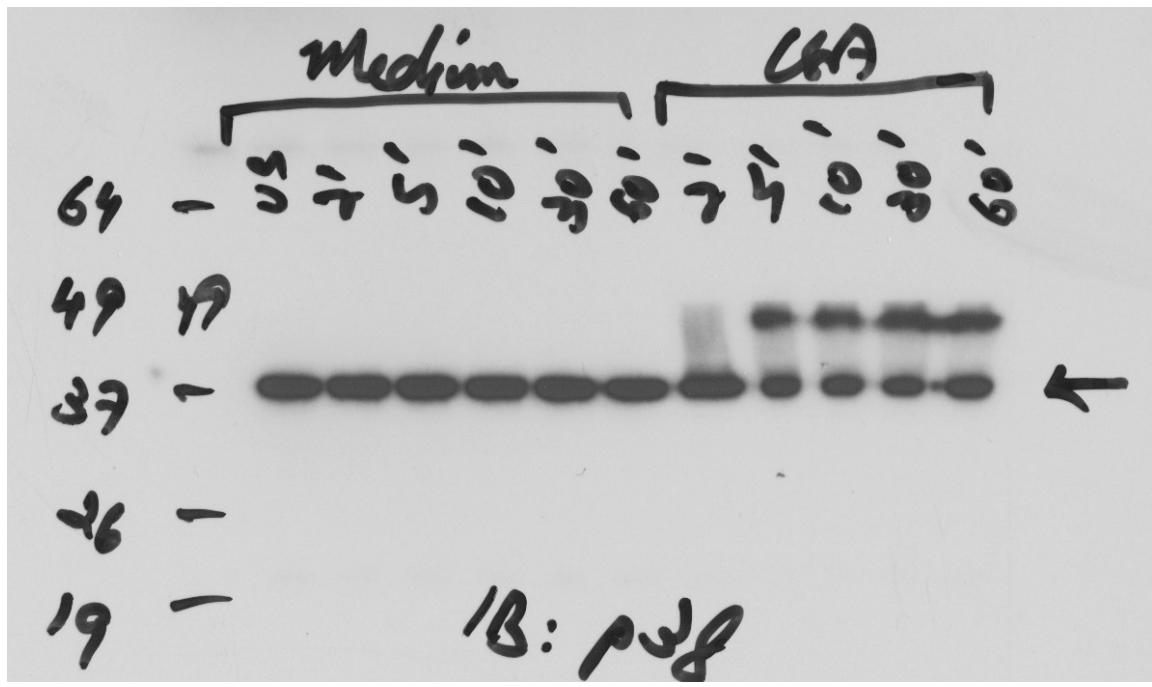



Supplementary Figure 1b.

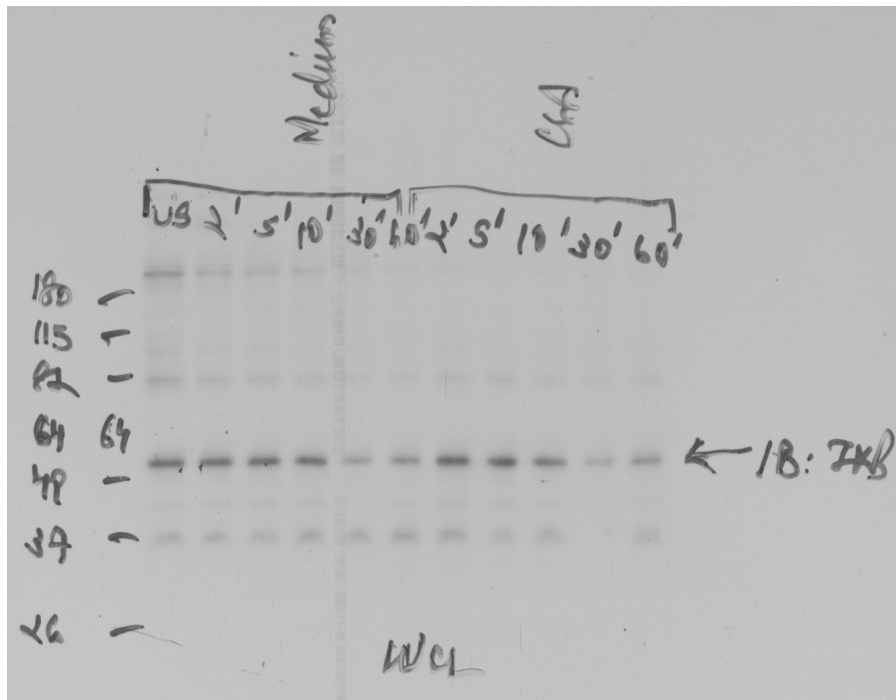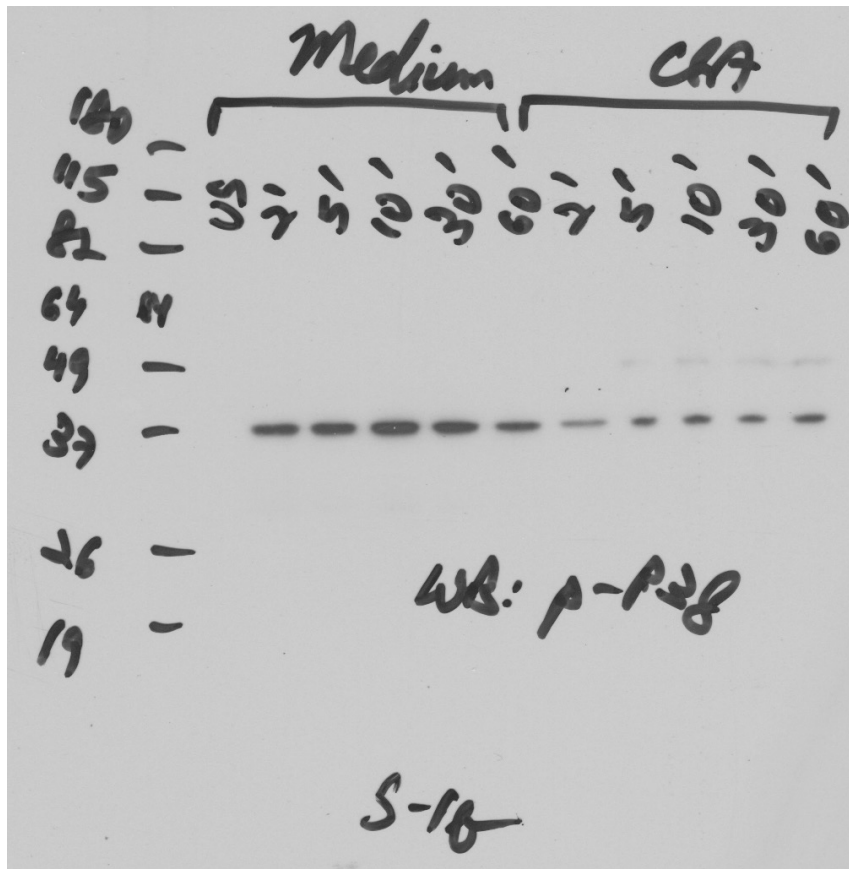

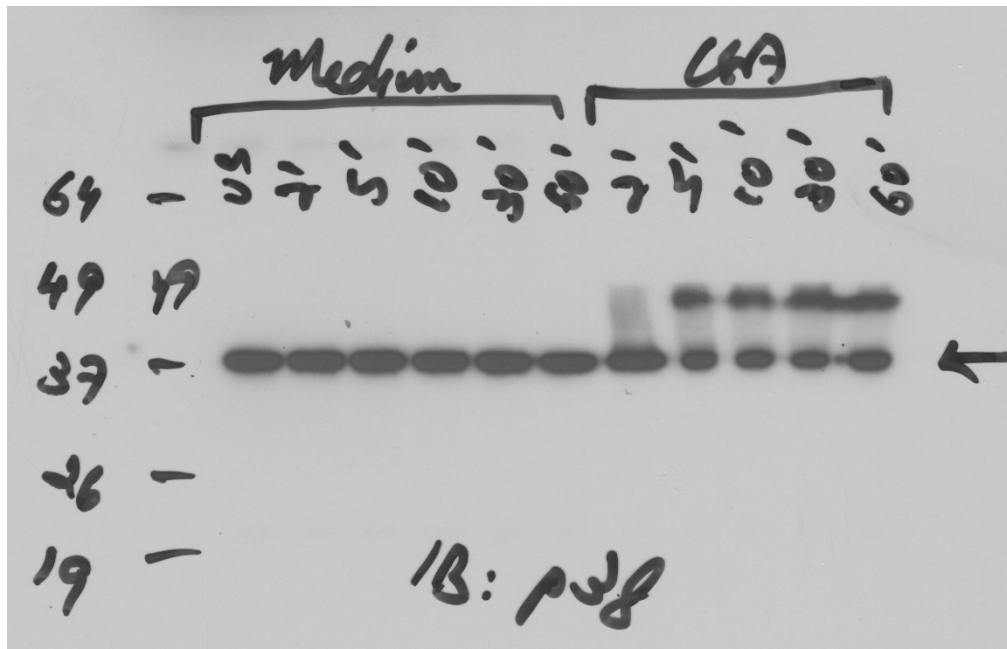

Supplementary Figure 1c.

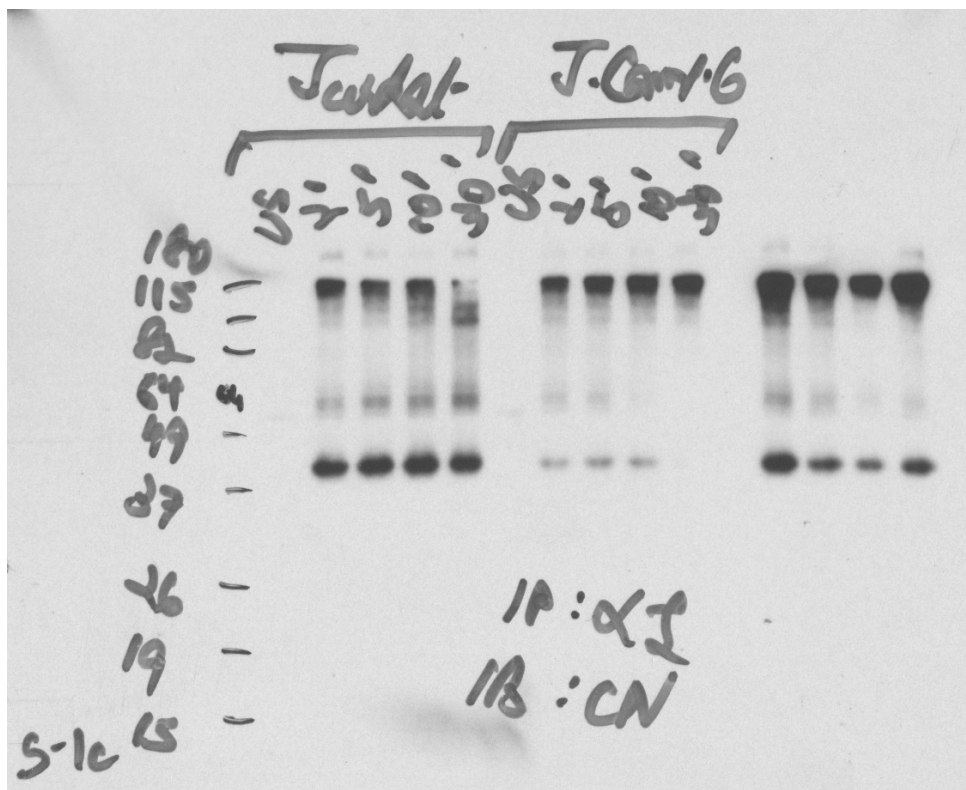



Supplementary Figure 1d.

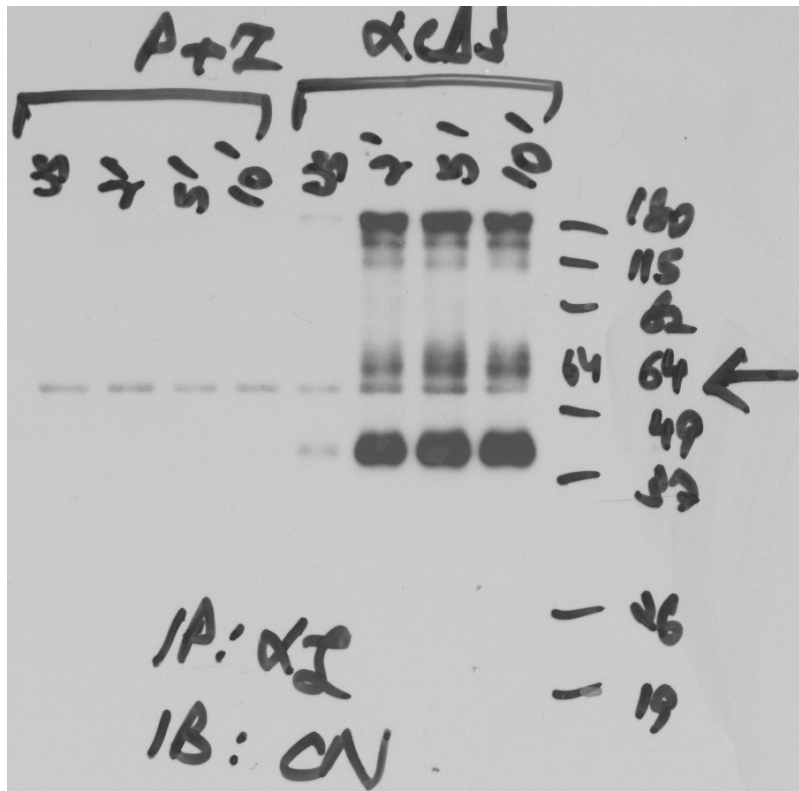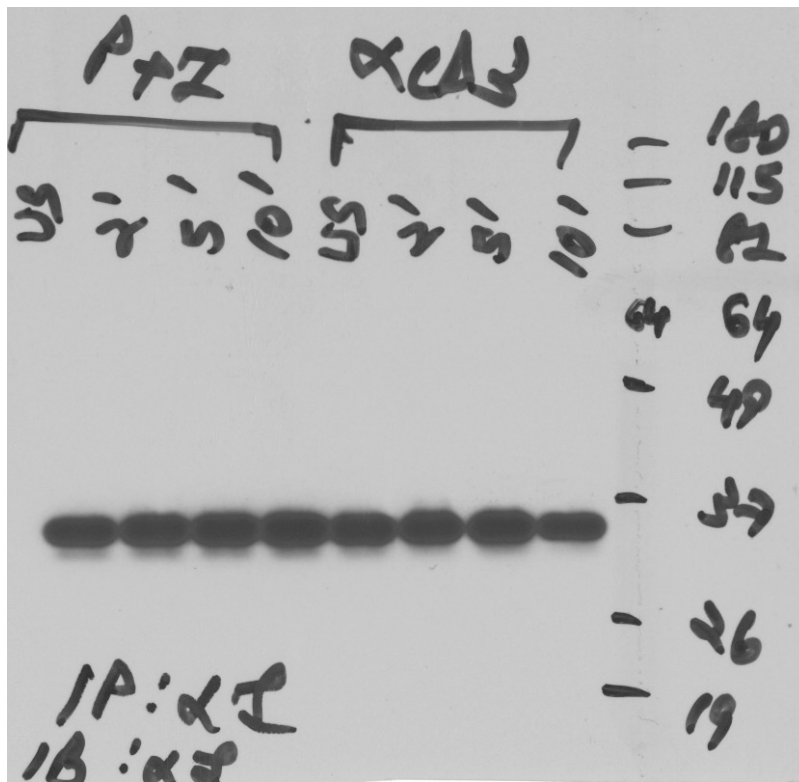

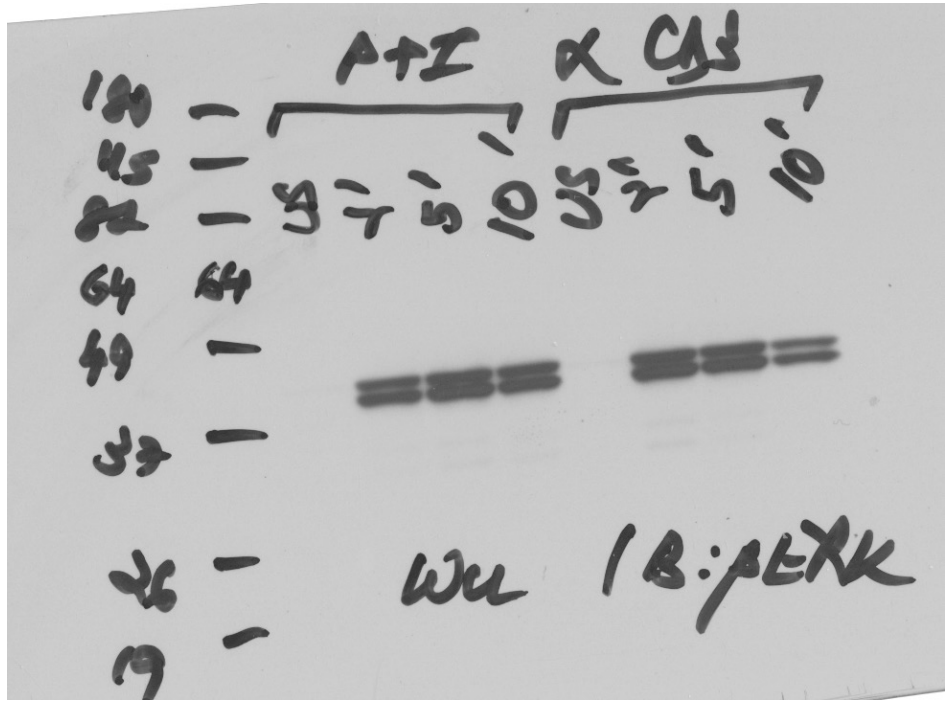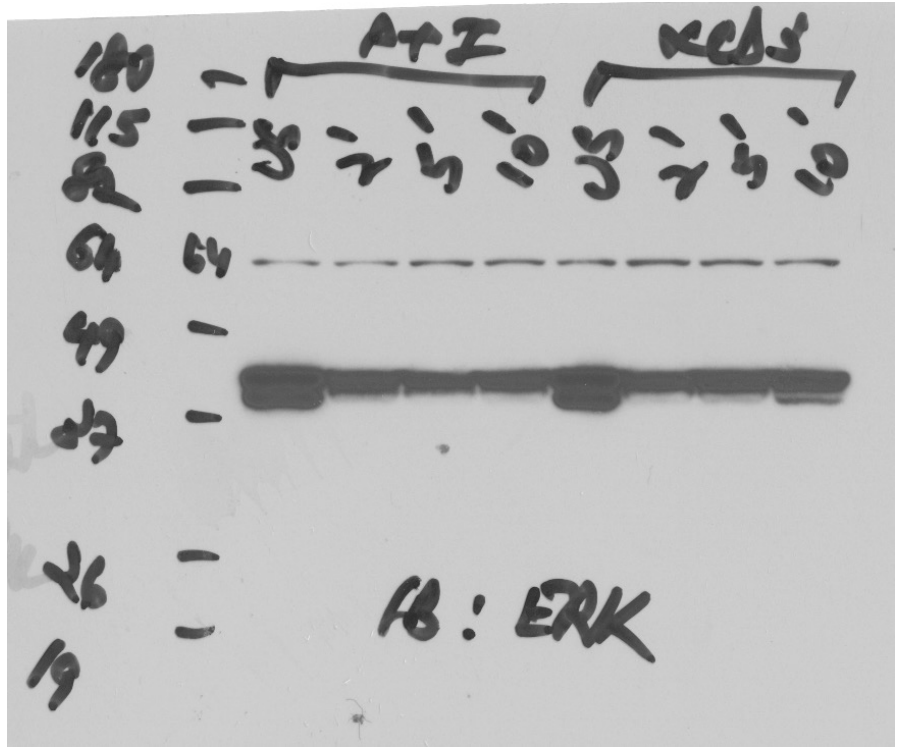

Supplementary Figure 2a.

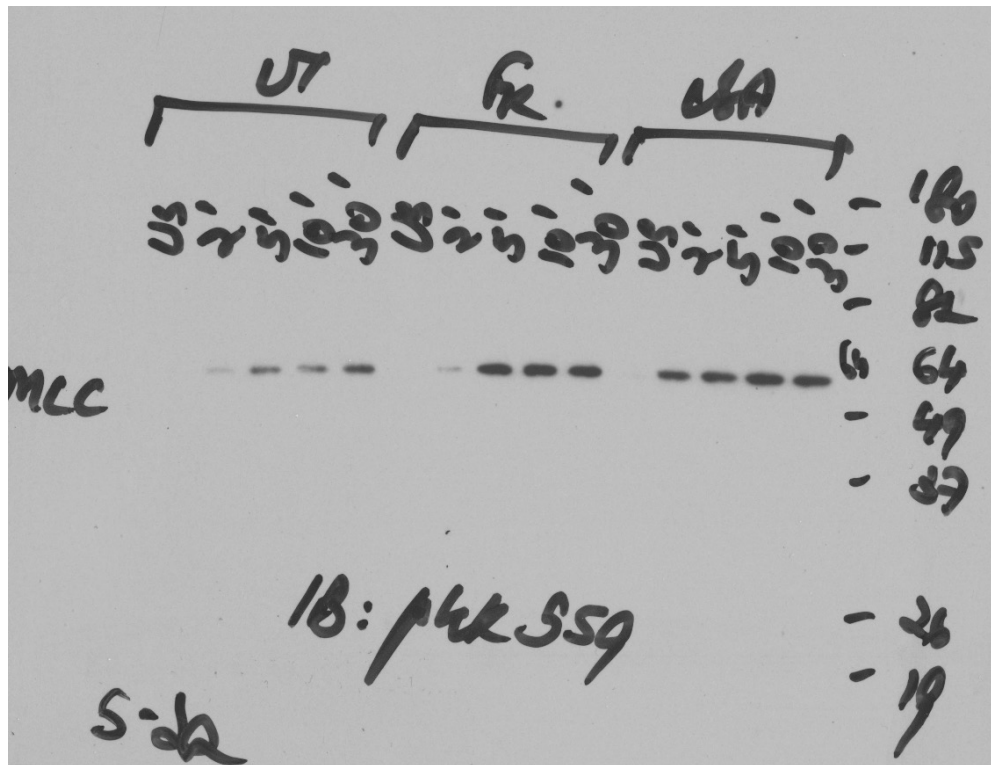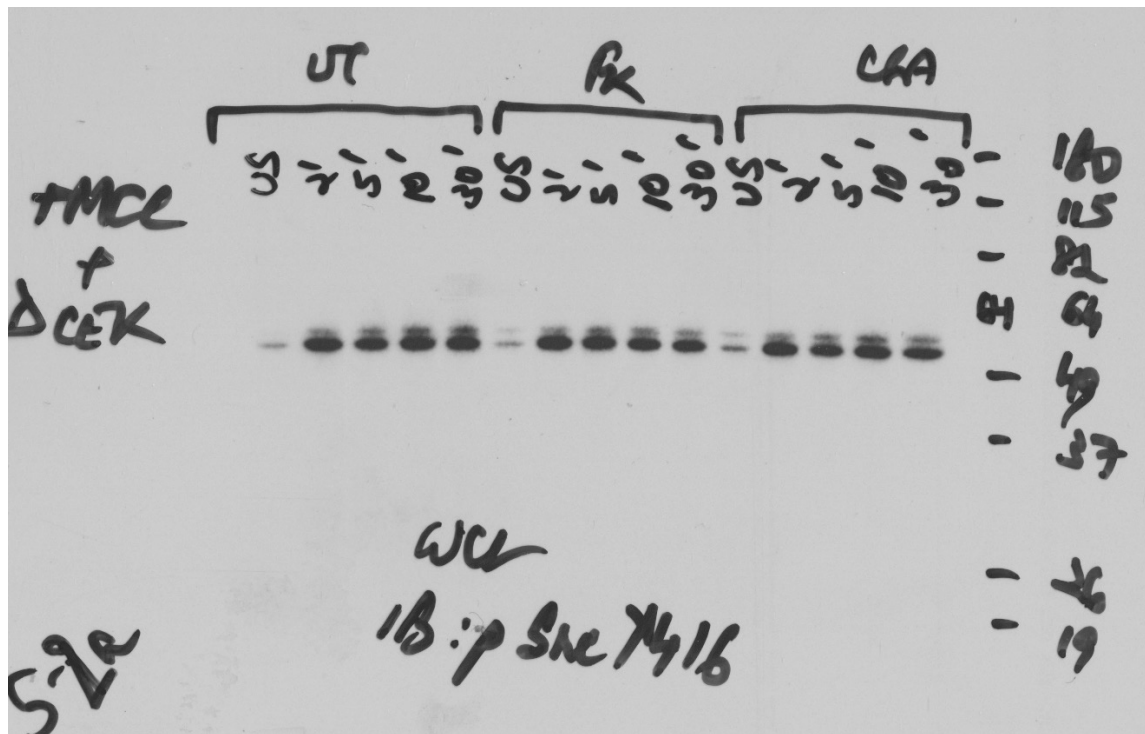

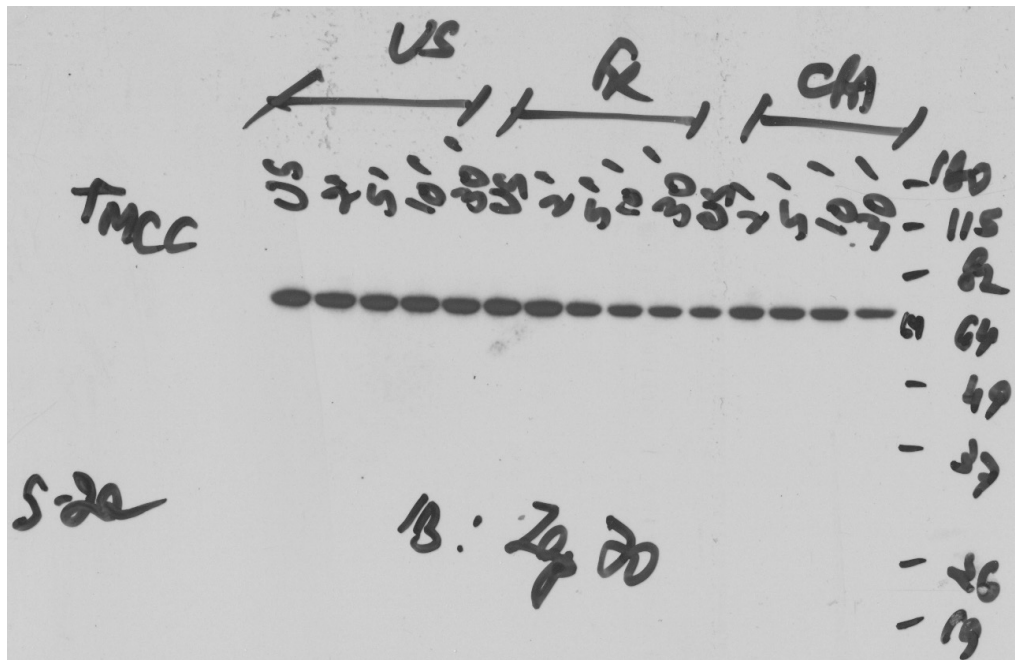

Supplementary Figure 2b.

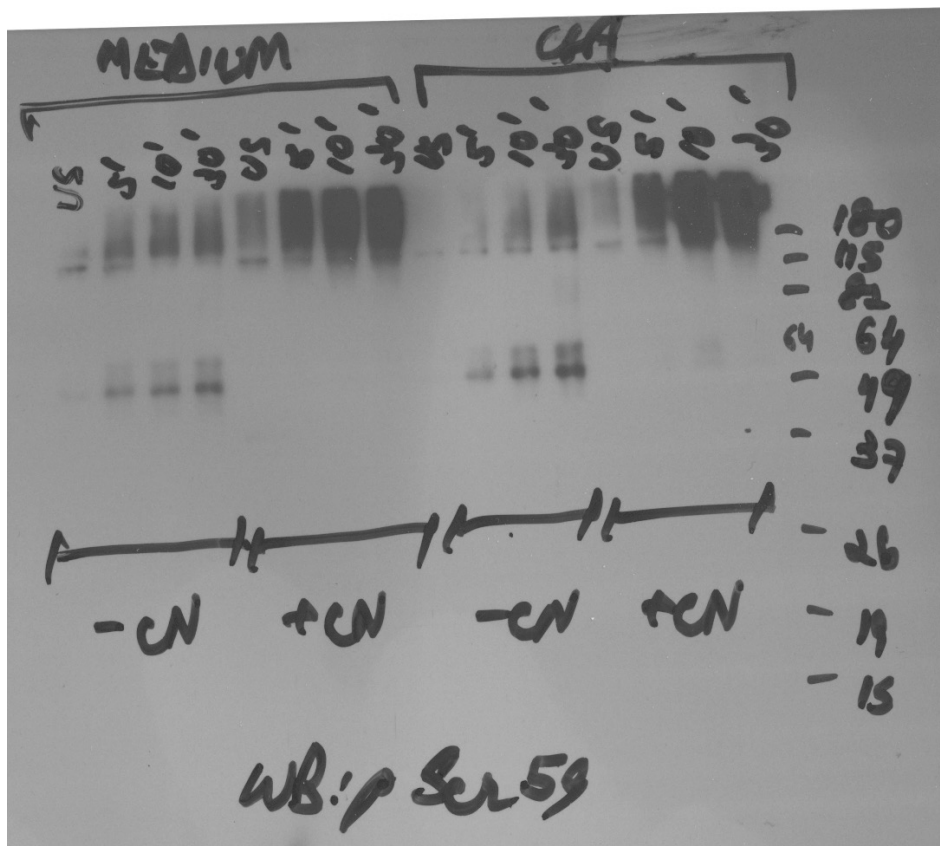



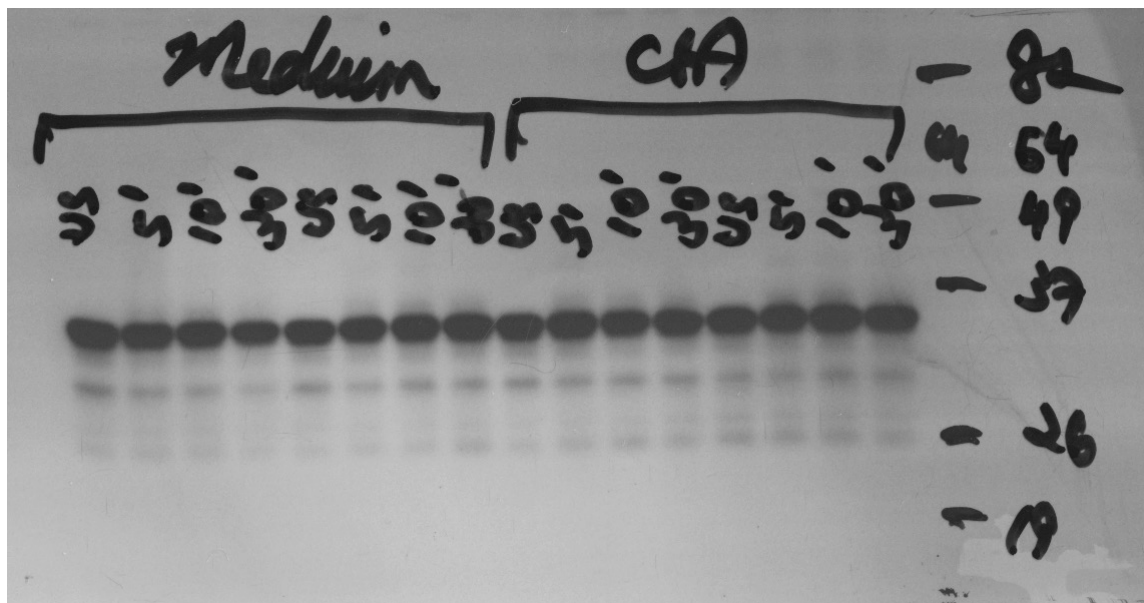

Supplementary Figure 2c.

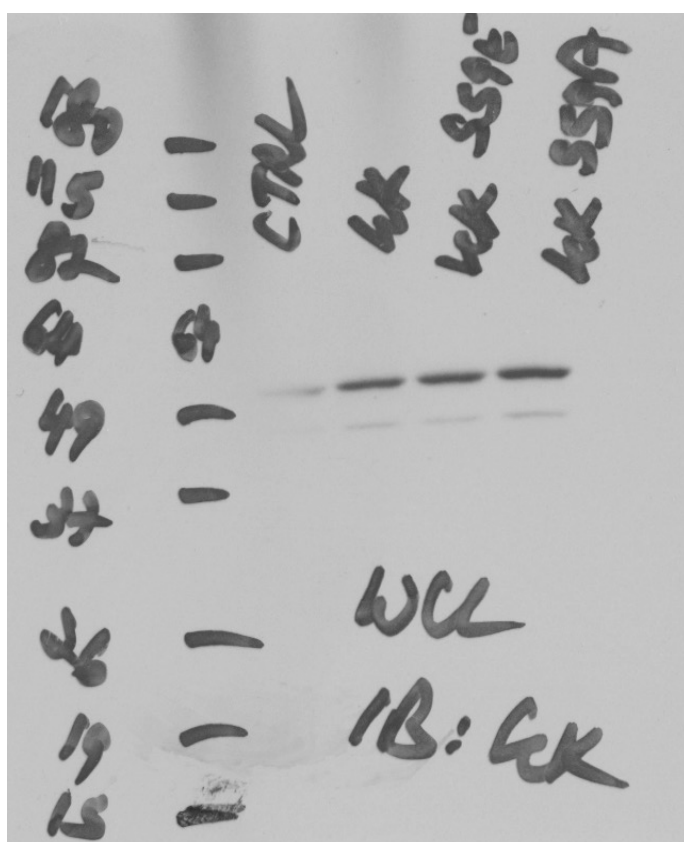



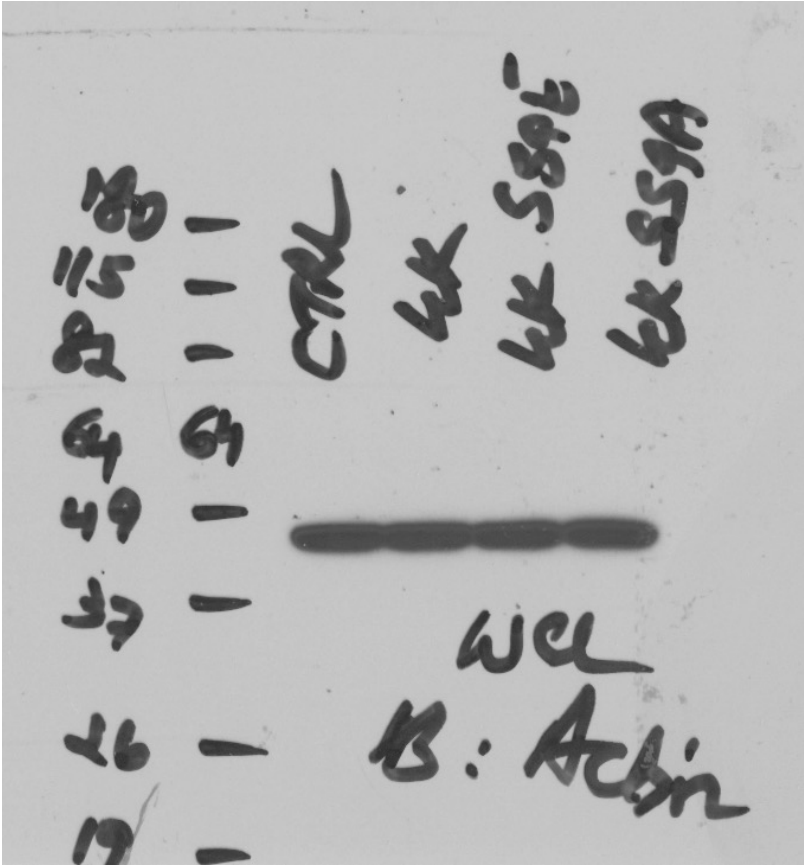

Rebuttal letter blot.

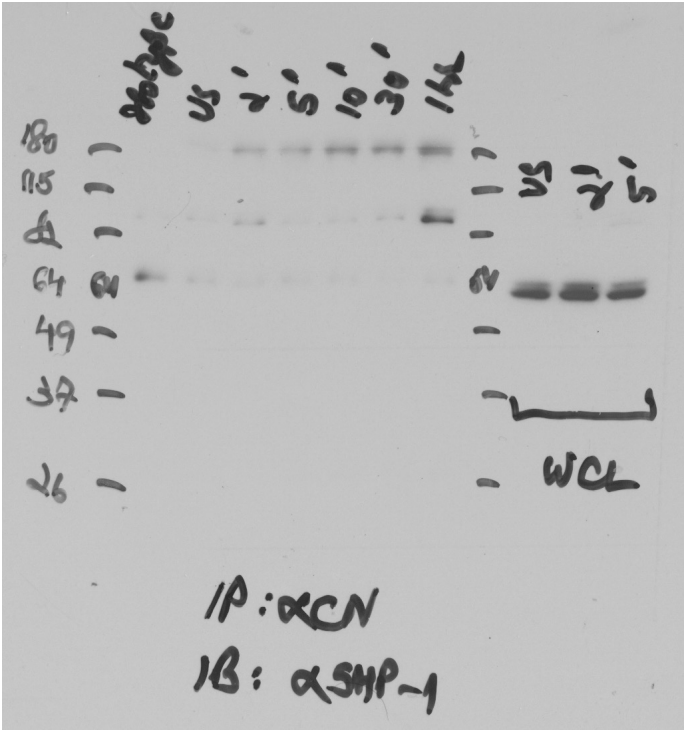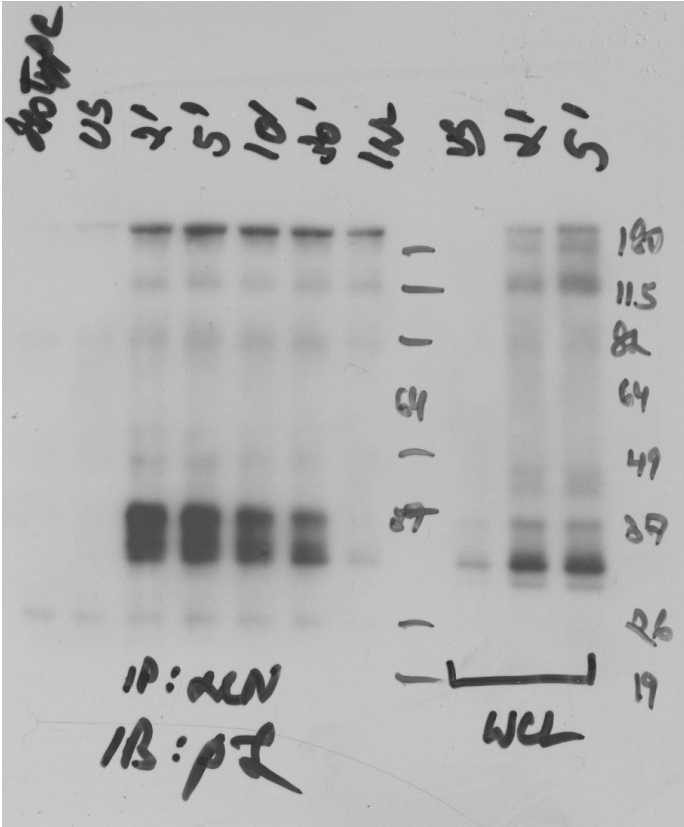

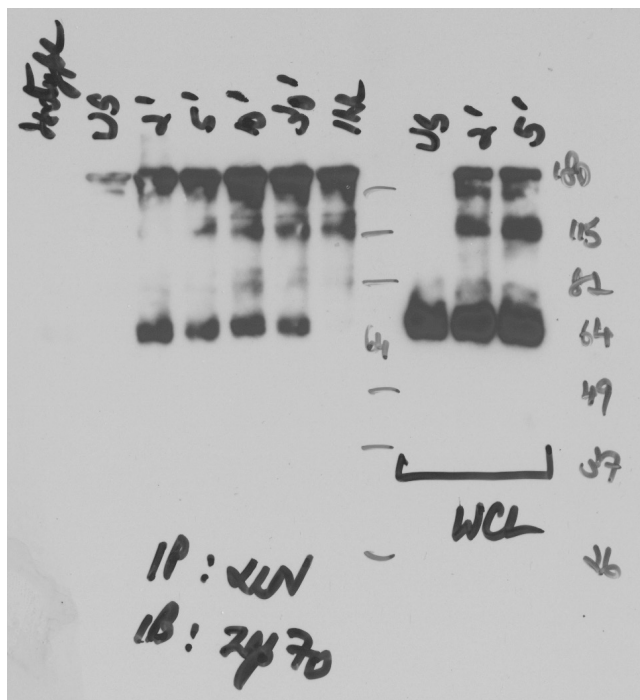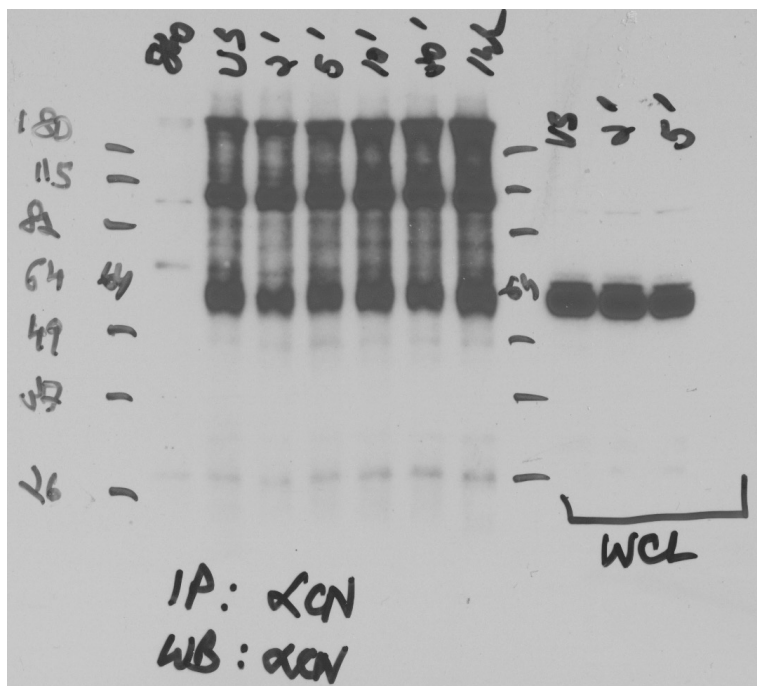

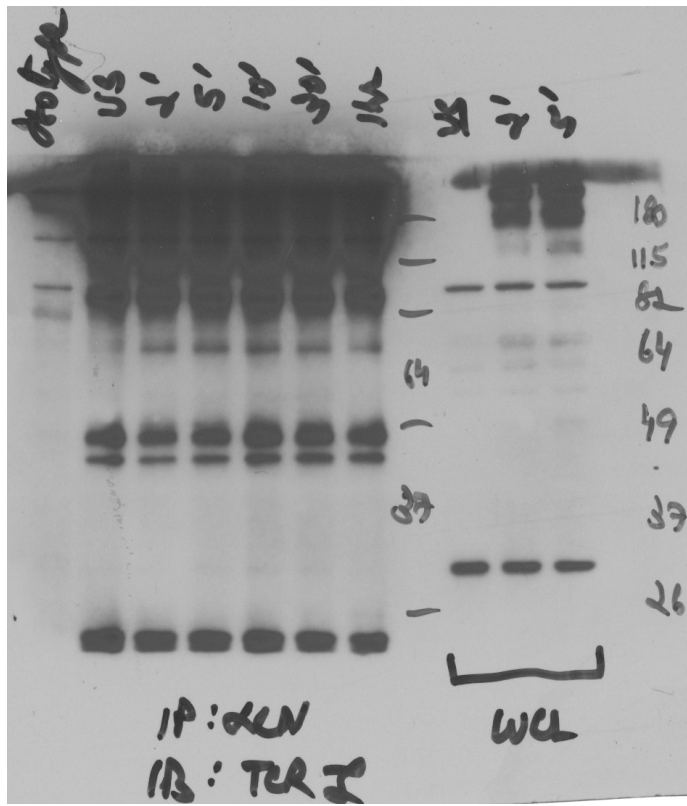

Supplement: NIHMS997931-supplement-Data_Set_1.pdf [file NIHMS997931-supplement-Data_Set_1.pdf]
