# Supplementary material
Source: PubMed Central journal article supplement (PMC6352896)

# CD3, 2.5 min

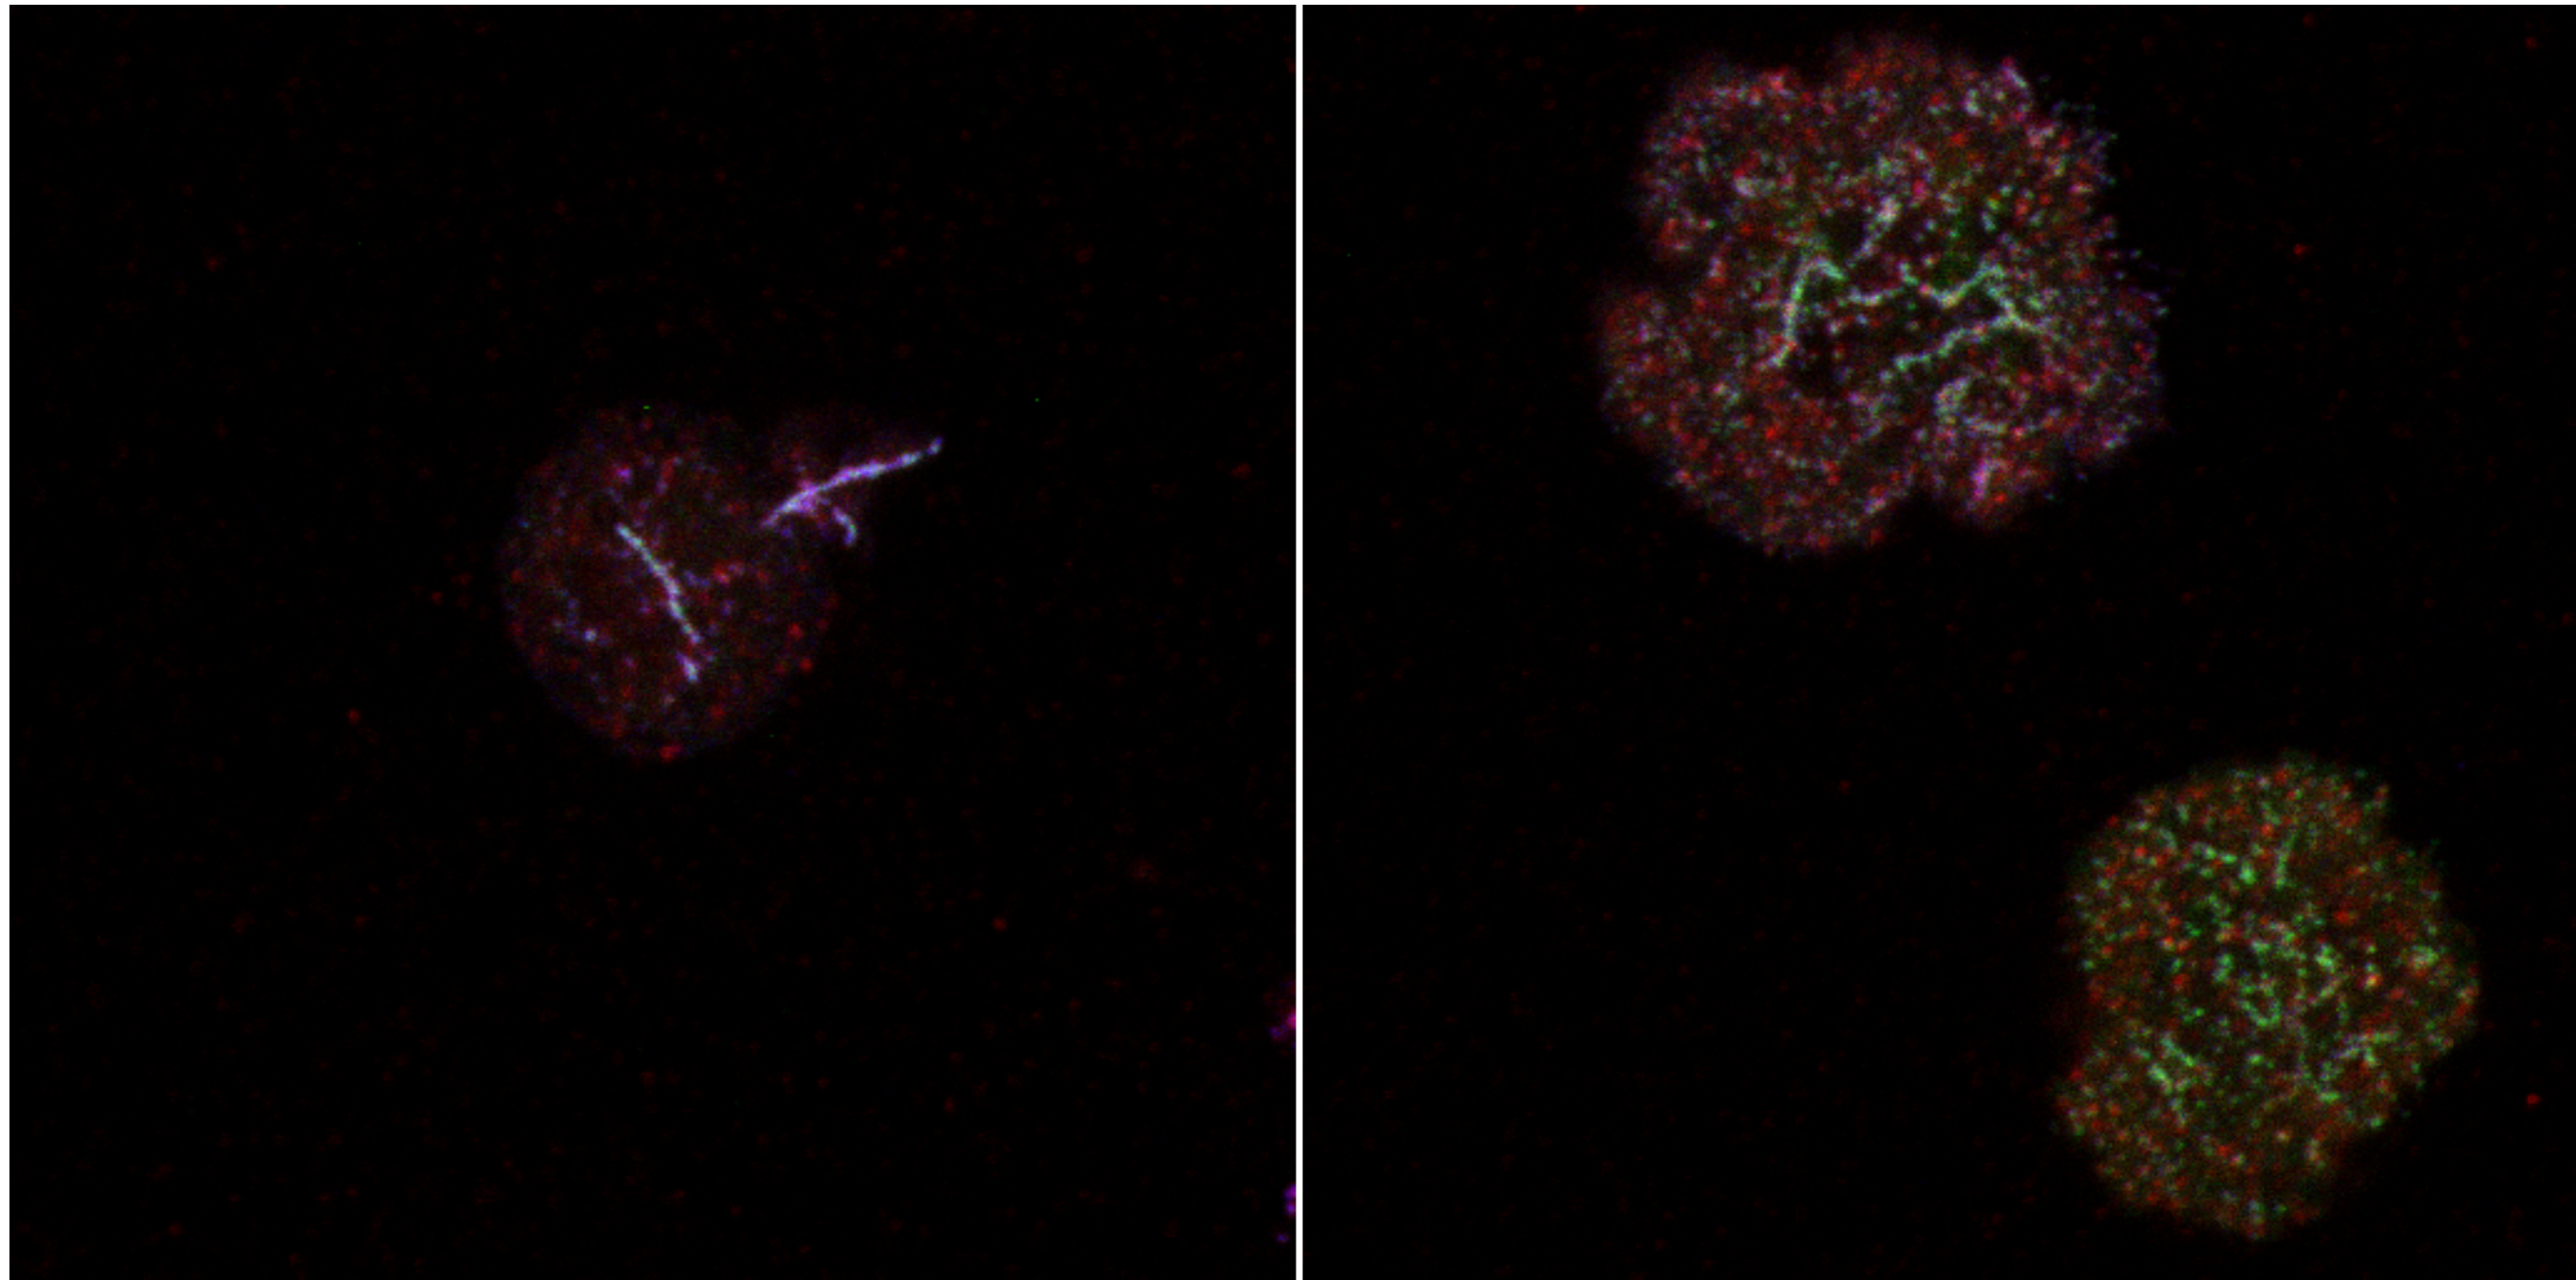



# CD45, 2.5 min

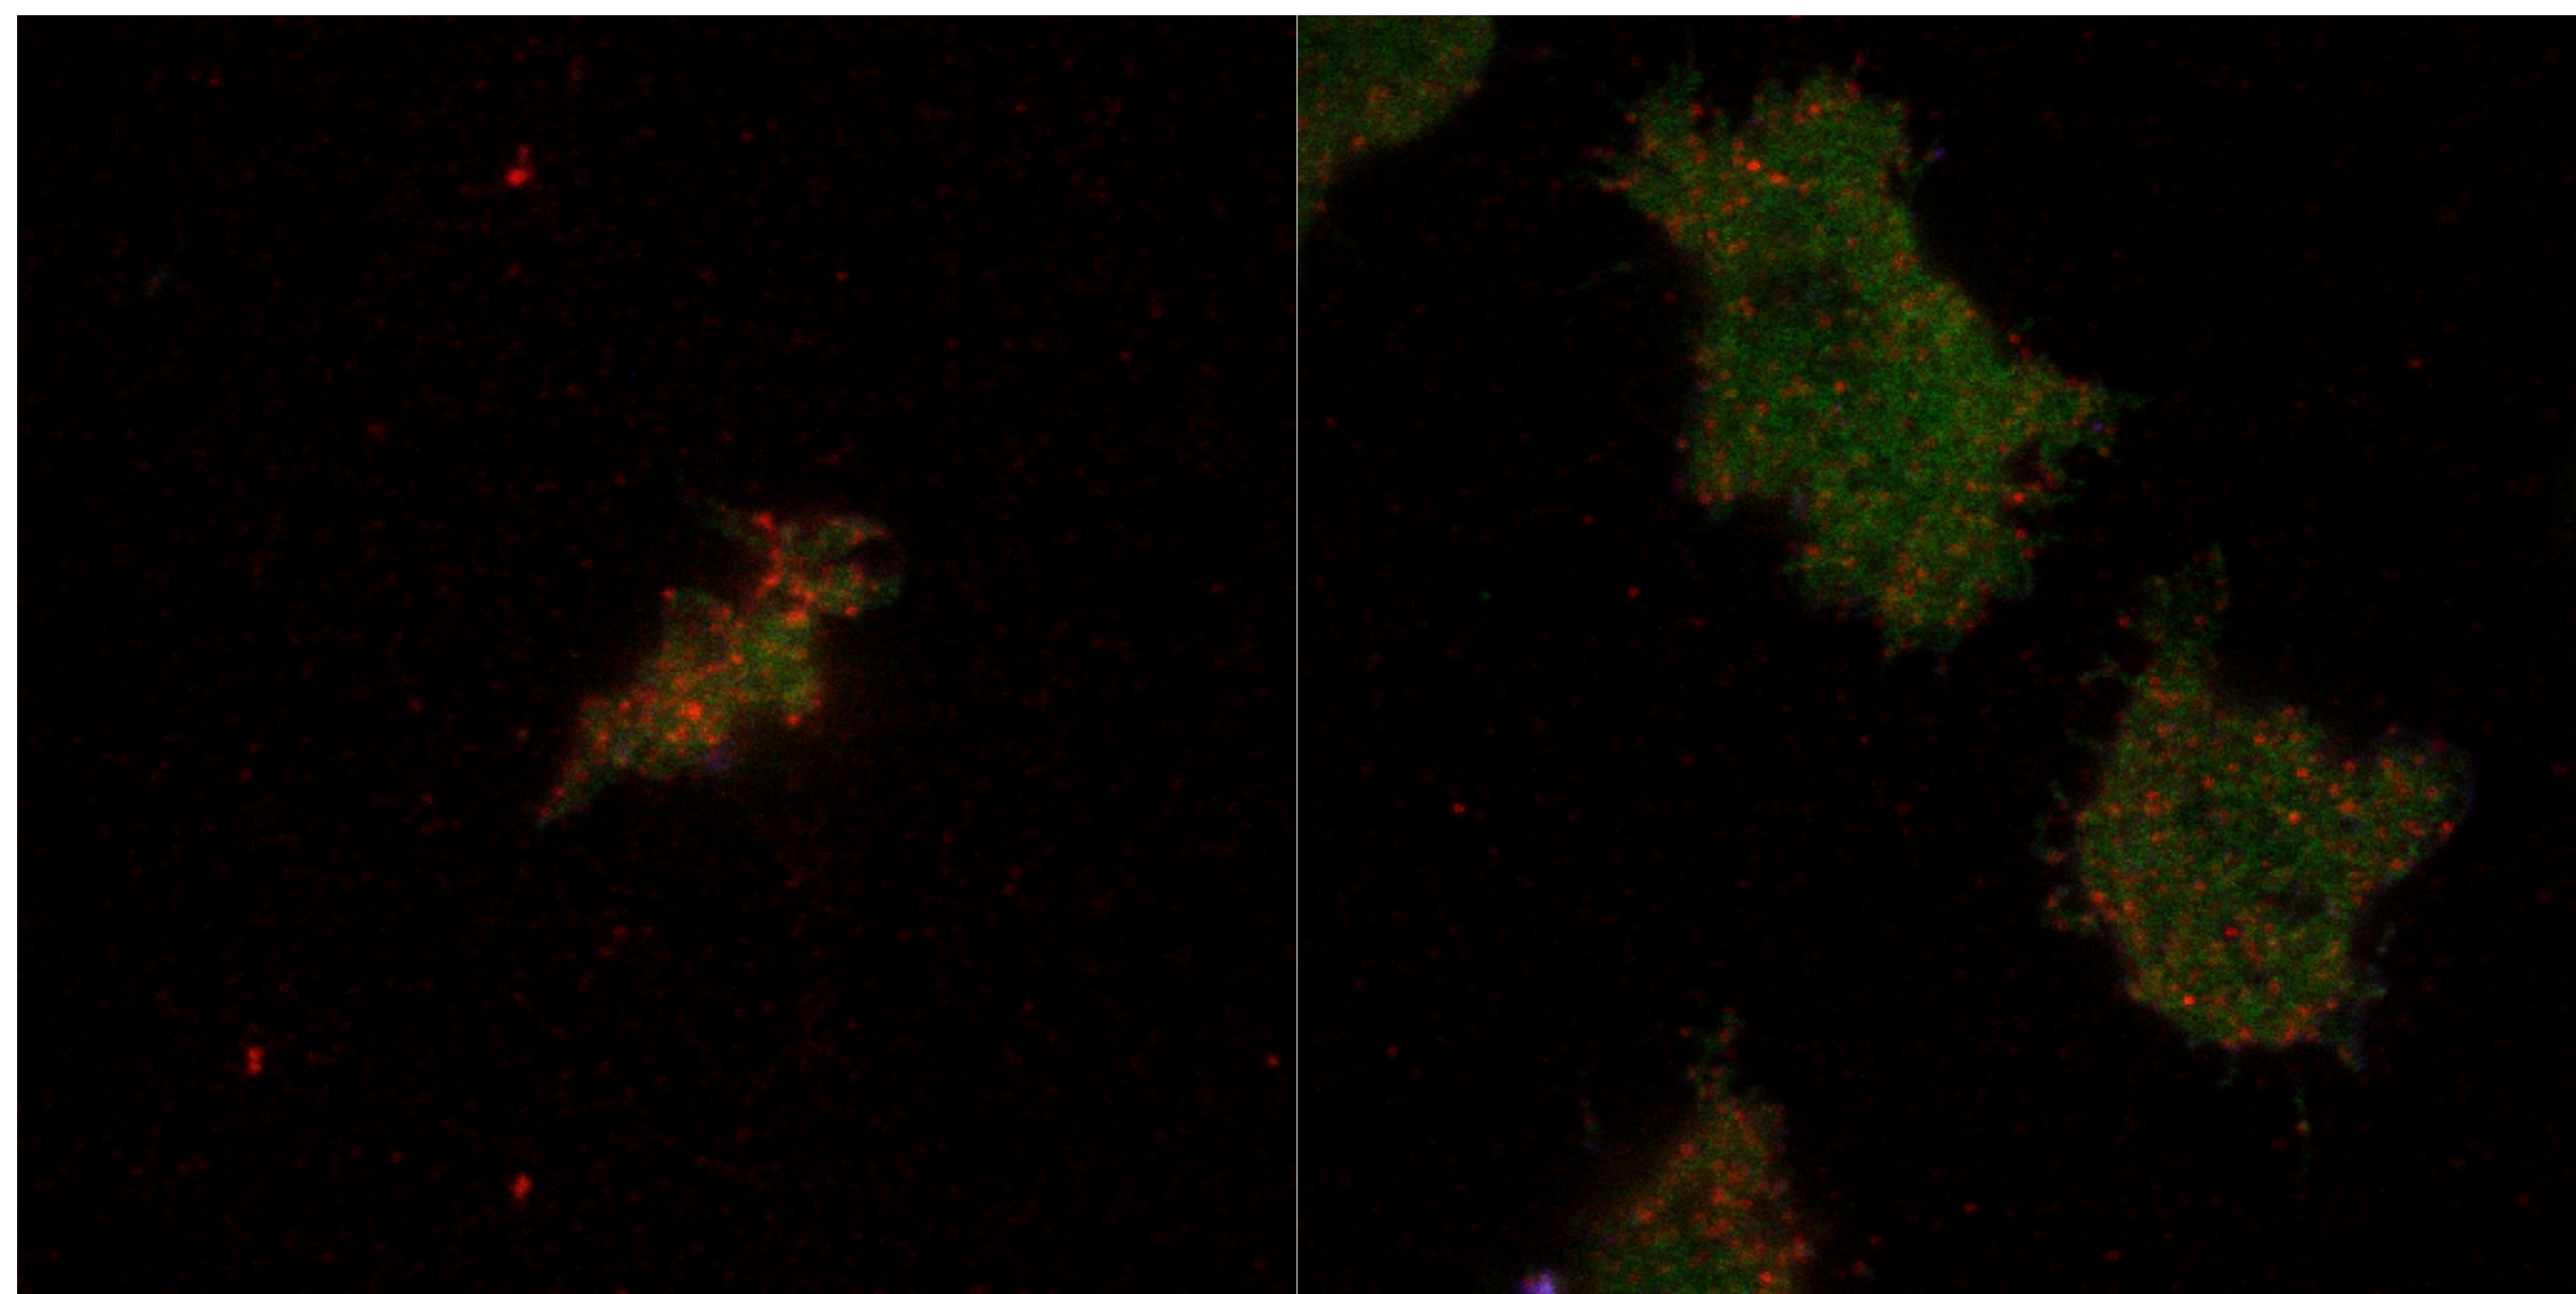



# CD3, 10 min

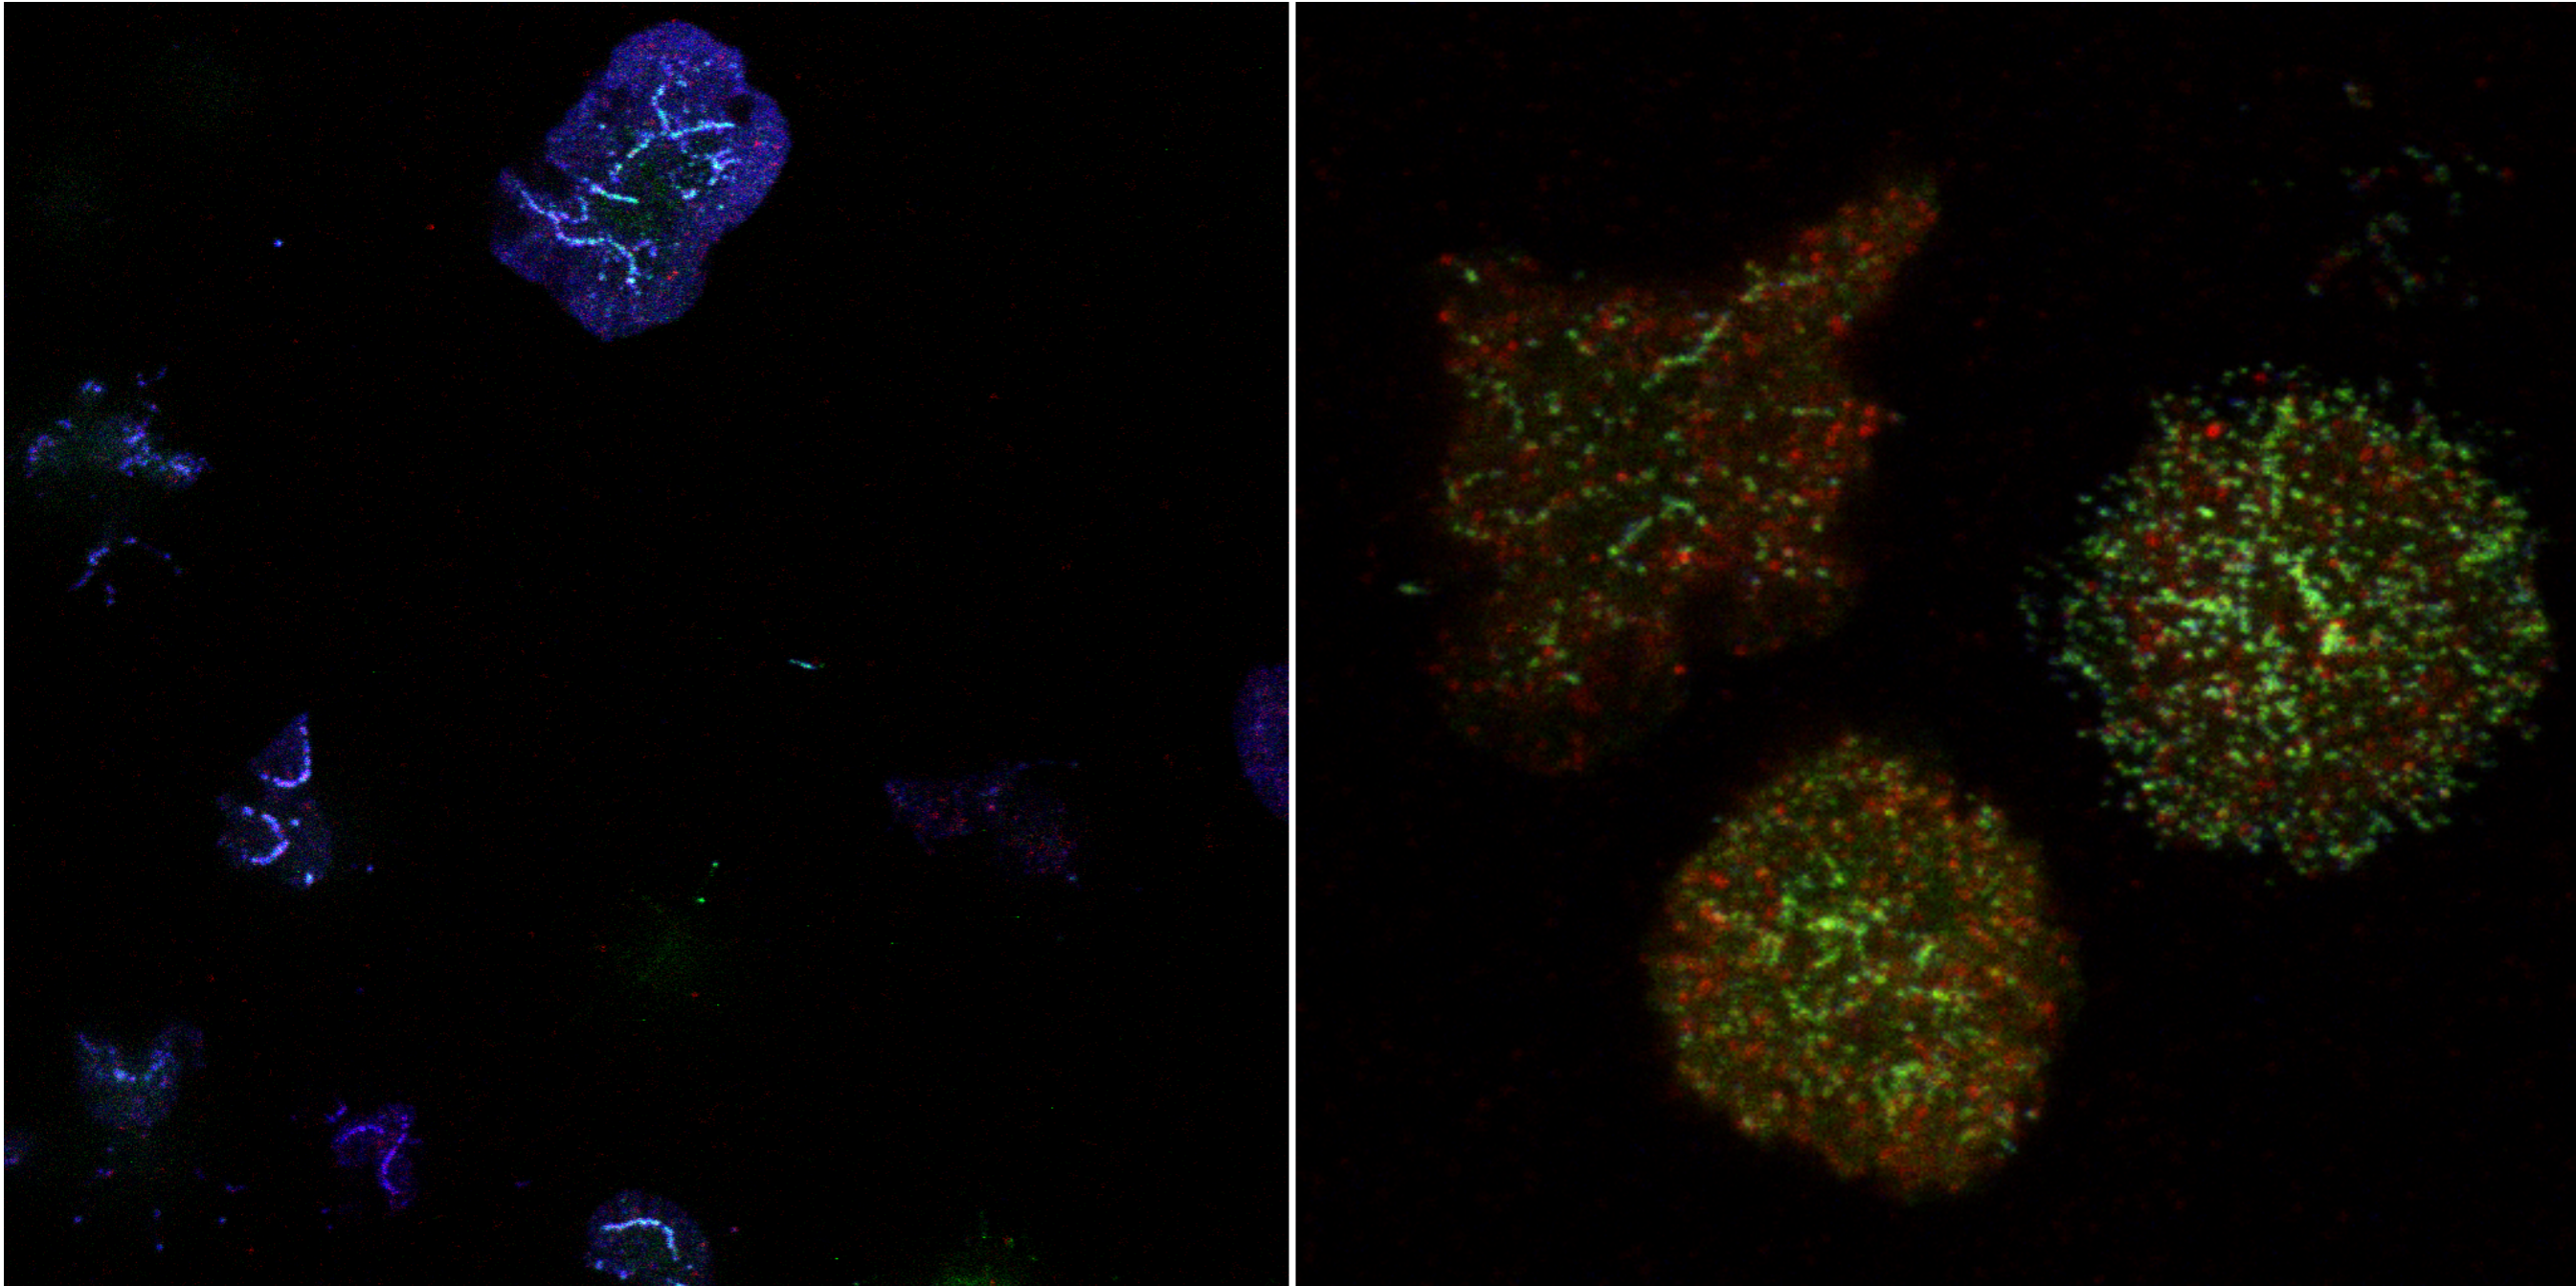



# CD45, 10 min

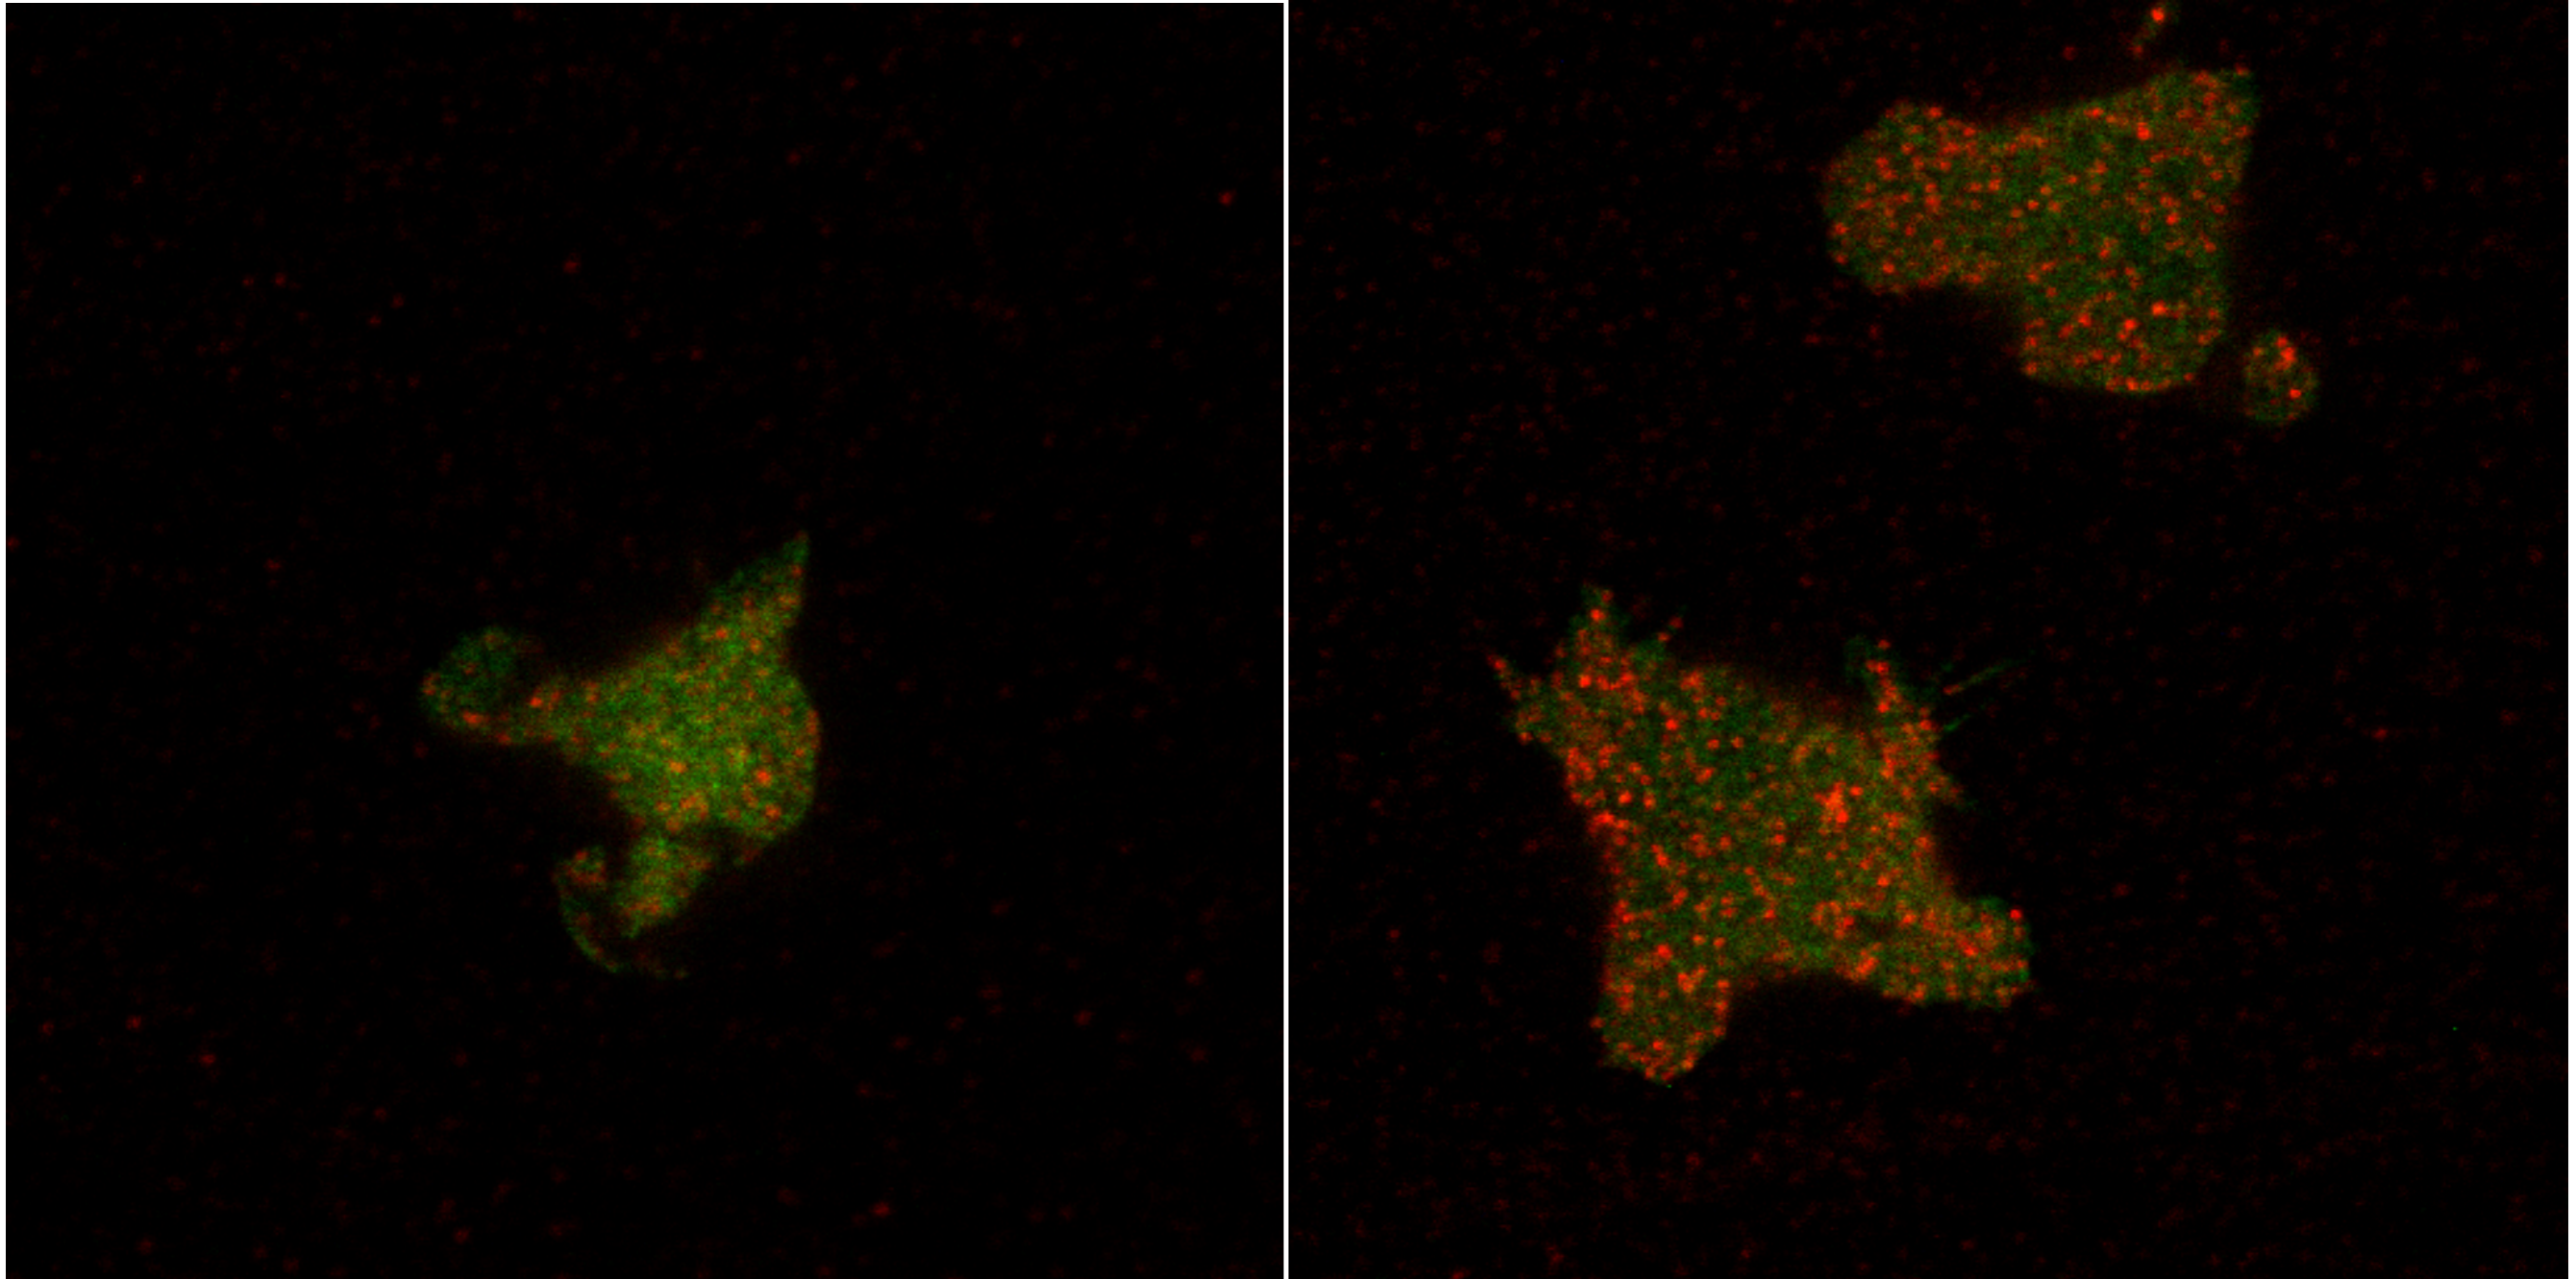

Supplement: NIHMS997931-supplement-Data_Set_2.pdf [file NIHMS997931-supplement-Data_Set_2.pdf]
